# Supplementary material for: Transactive Response DNA-Binding Protein (TARDBP/TDP-43) Regulates Cell Permissivity to HIV-1 Infection by Acting on HDAC6
Source: MDPI journal article supplement (doi:10.3390/ijms23116180), 2022-05-31

**A** Replicate 1 as figure format

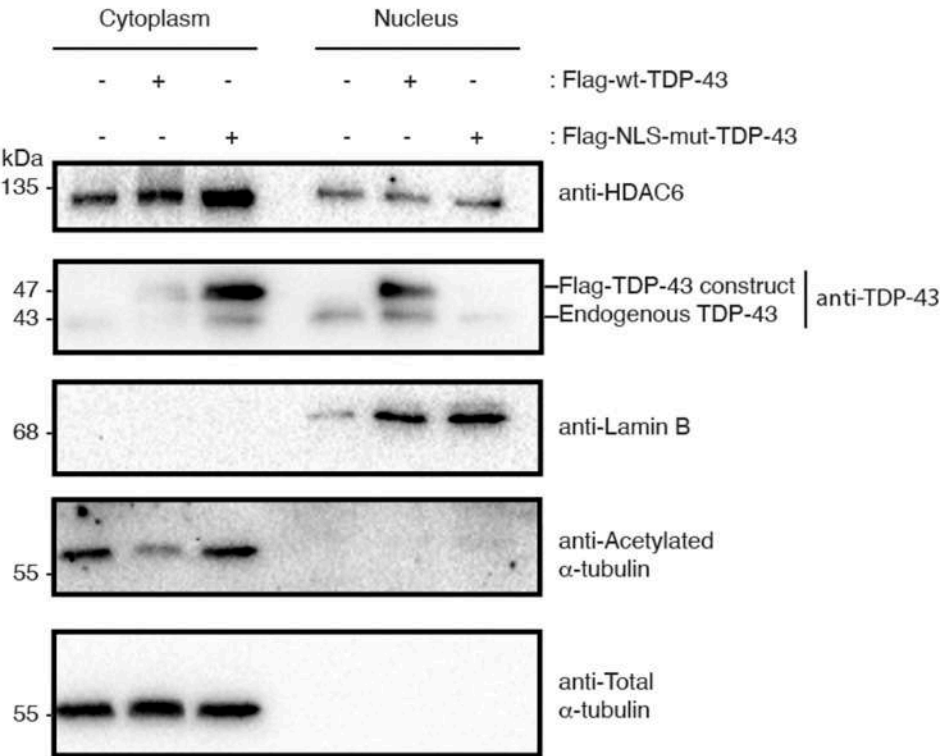

**A** Replicate 2 as figure format

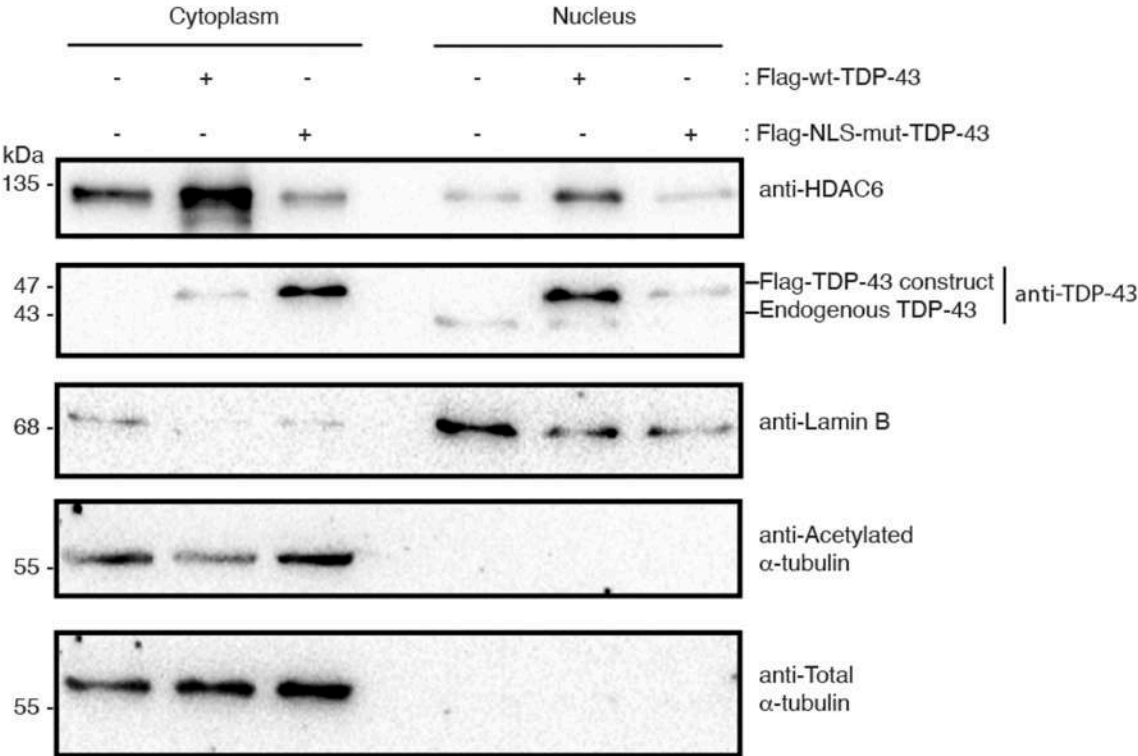

**A** Replicate 3 as figure format

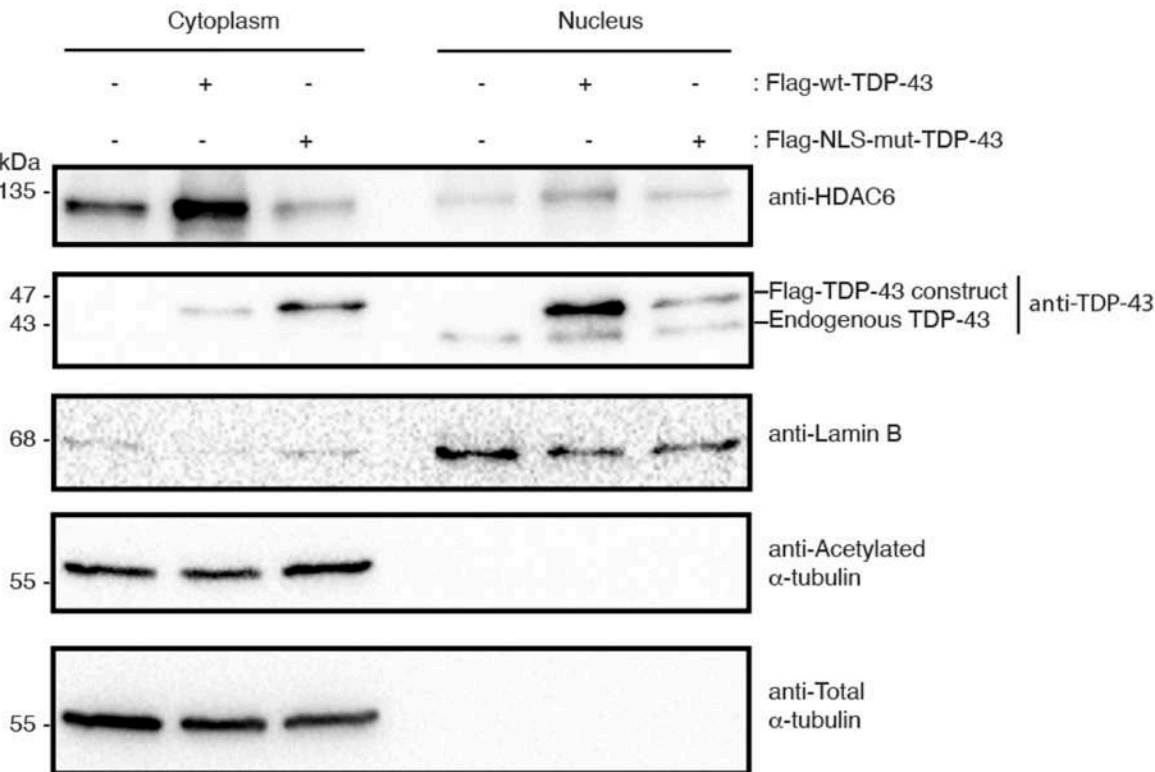

**Figure S1.** Replicate 1 HDAC6 complete gel Western-blot associated with Figure 1A  
Cabrera-Rodríguez, R., *et al.*

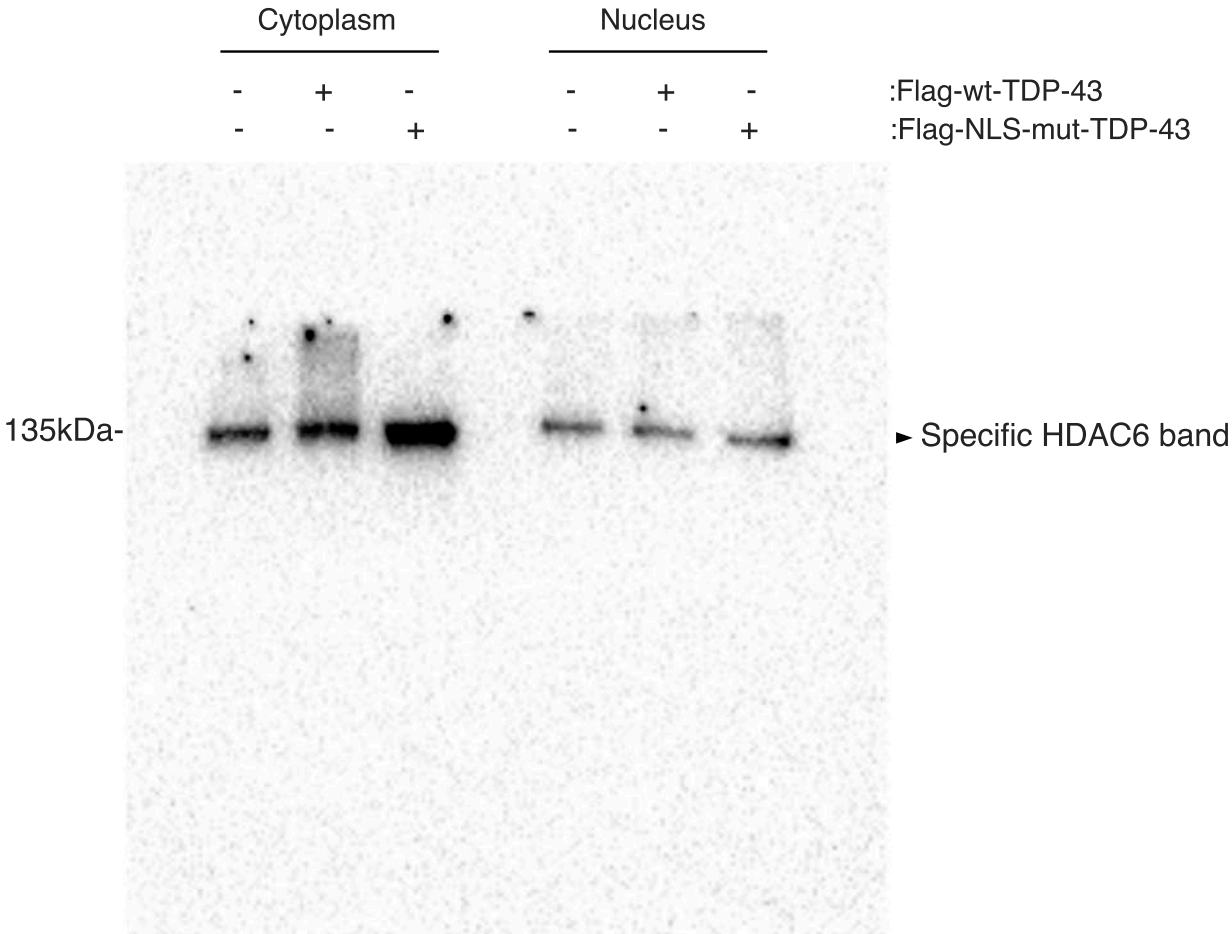

**Figure S1.** Replicate 1 TDP-43 complete gel Western-blot associated with Figure 1A  
Cabrera-Rodríguez, R., *et al.*

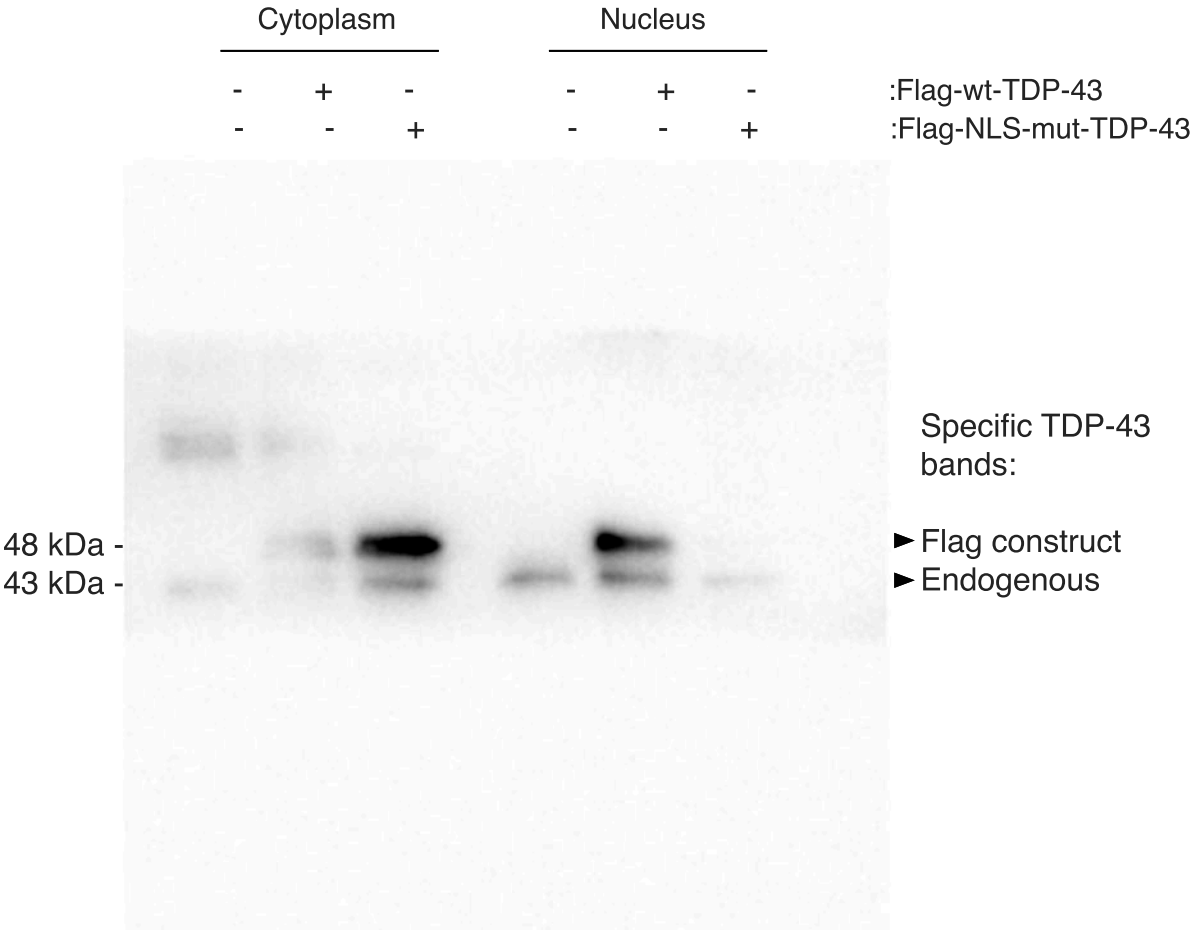

**Figure S1.** Replicate 1 Lamin B complete gel Western-blot associated with Figure 1A  
Cabrera-Rodríguez, R., *et al.*

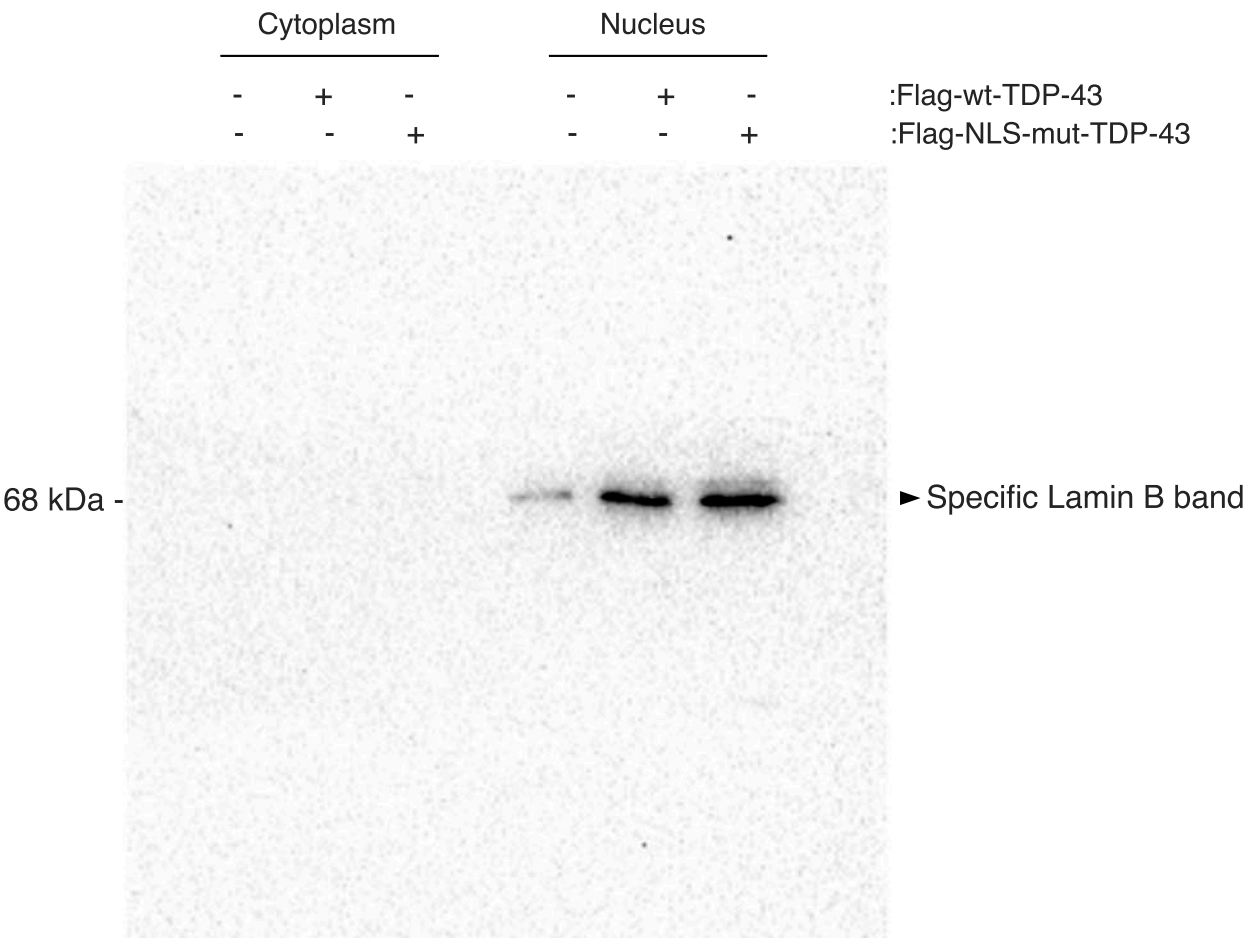

**Figure S1.** Replicate 1 Acetylated  $\alpha$ -tubulin complete gel Western-blot associated with Figure 1A  
Cabrera-Rodríguez, R., *et al.*

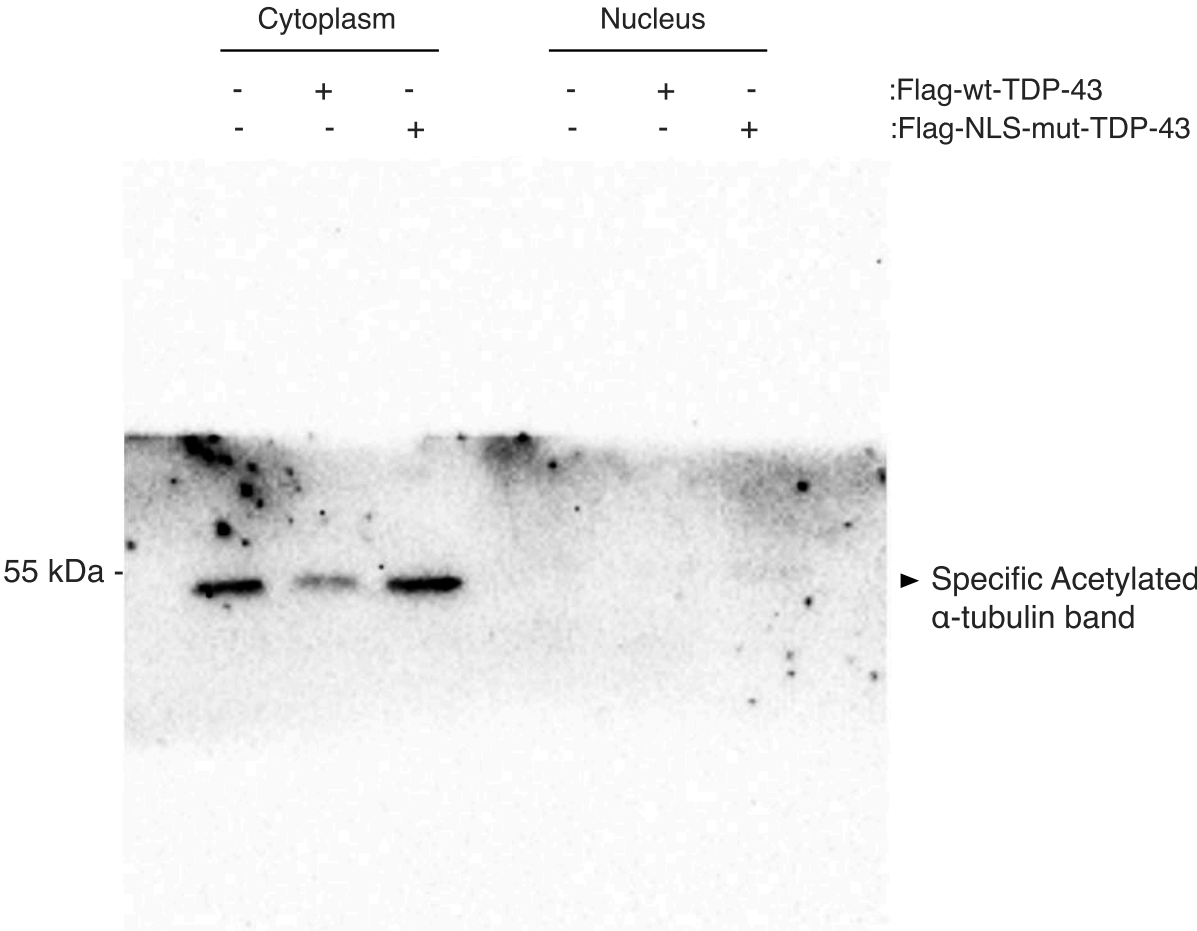

**Figure S1.** Replicate 1 Total  $\alpha$ -tubulin complete gel Western-blot associated with Figure 1A  
Cabrera-Rodríguez, R., *et al.*

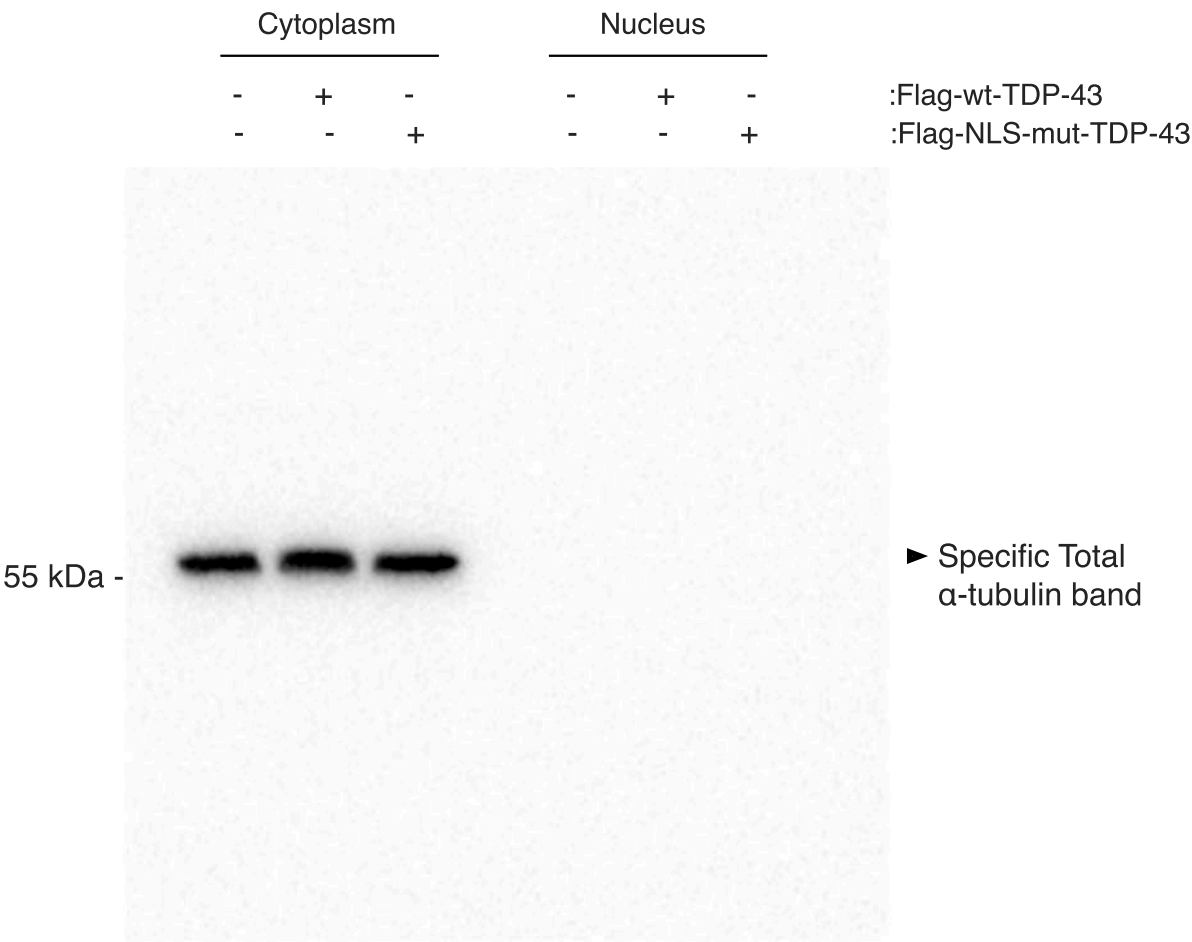

**Figure S1.** Replicate 2 HDAC6 complete gel Western-blot associated with Figure 1A  
Cabrera-Rodríguez, R., *et al.*.

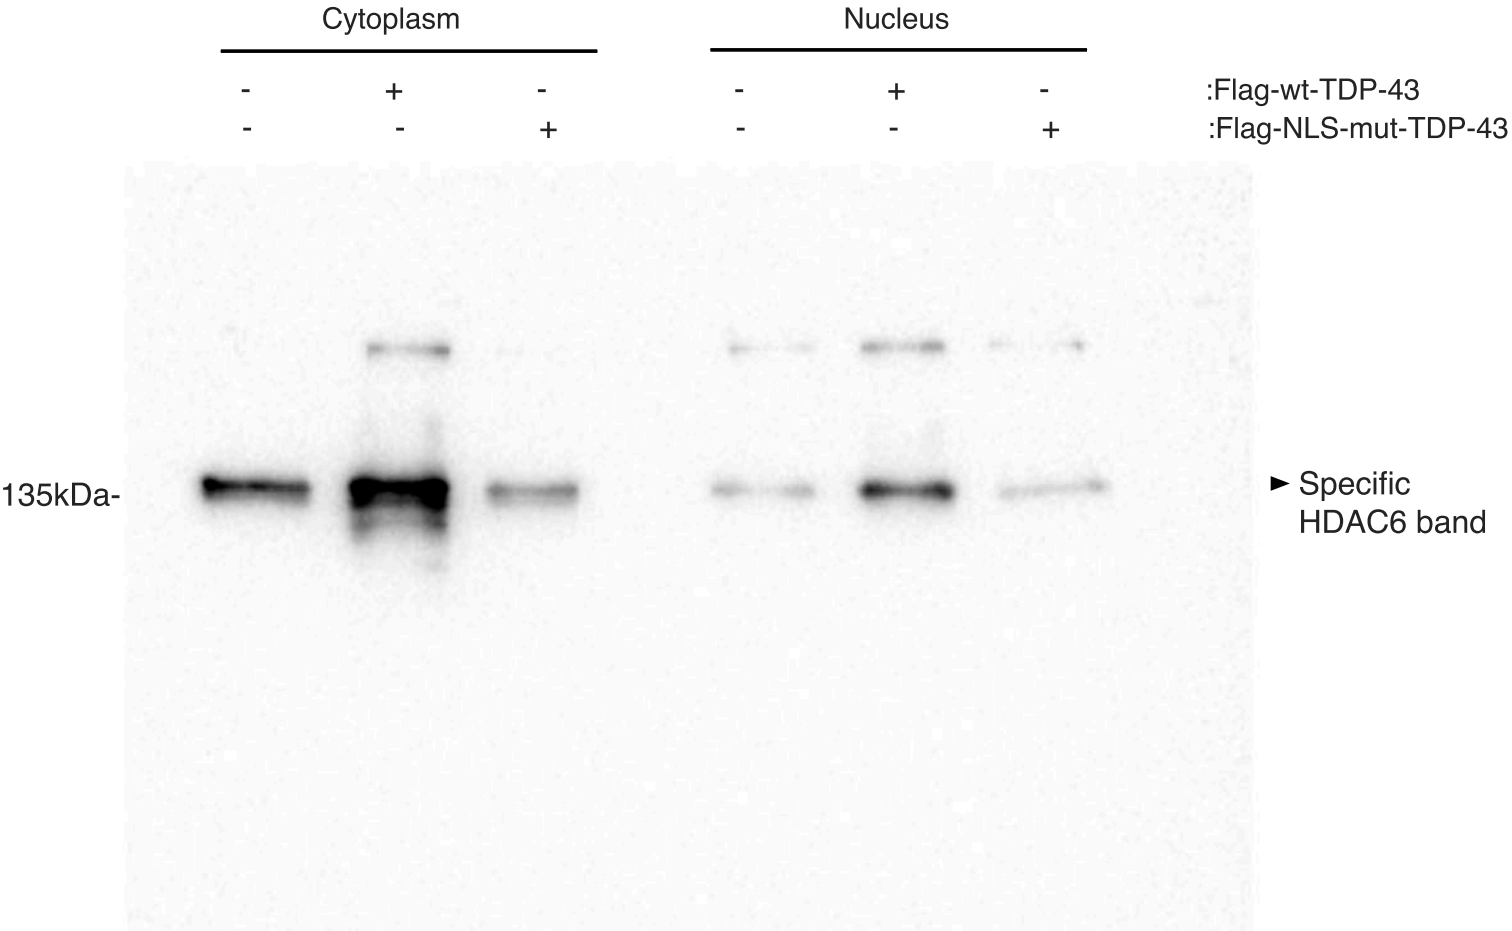

**Figure S1.** Replicate 2 TDP-43 complete gel Western-blot associated with Figure 1A  
Cabrera-Rodríguez, R., *et al.*

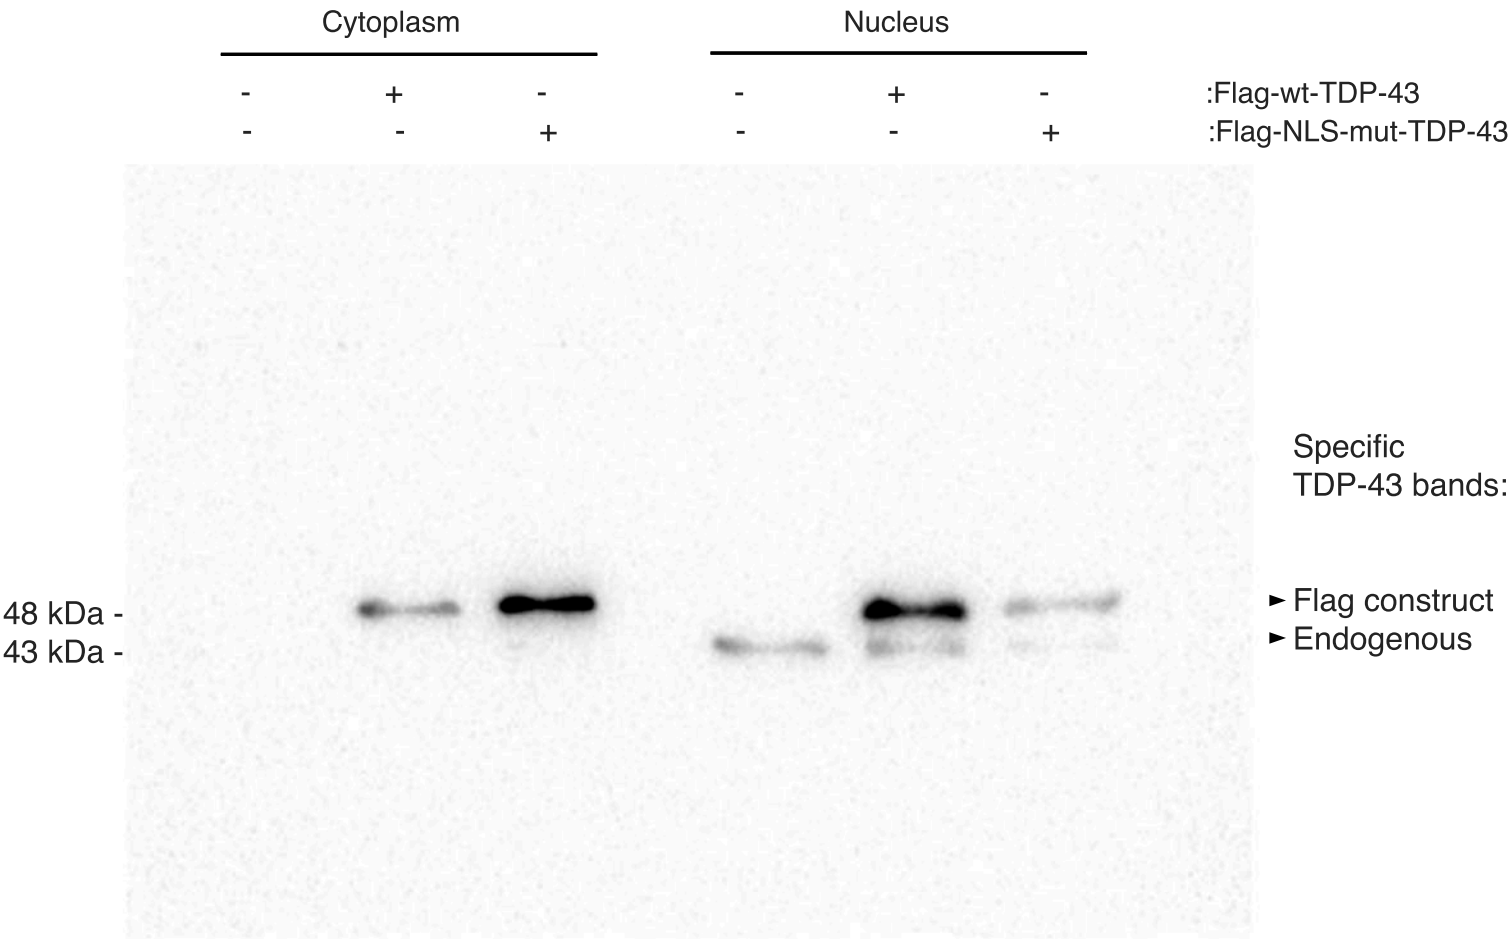



**Figure S1.** Replicate 2 Lamin B complete gel Western-blot associated with Figure 1A  
Cabrera-Rodríguez, R., *et al.*.

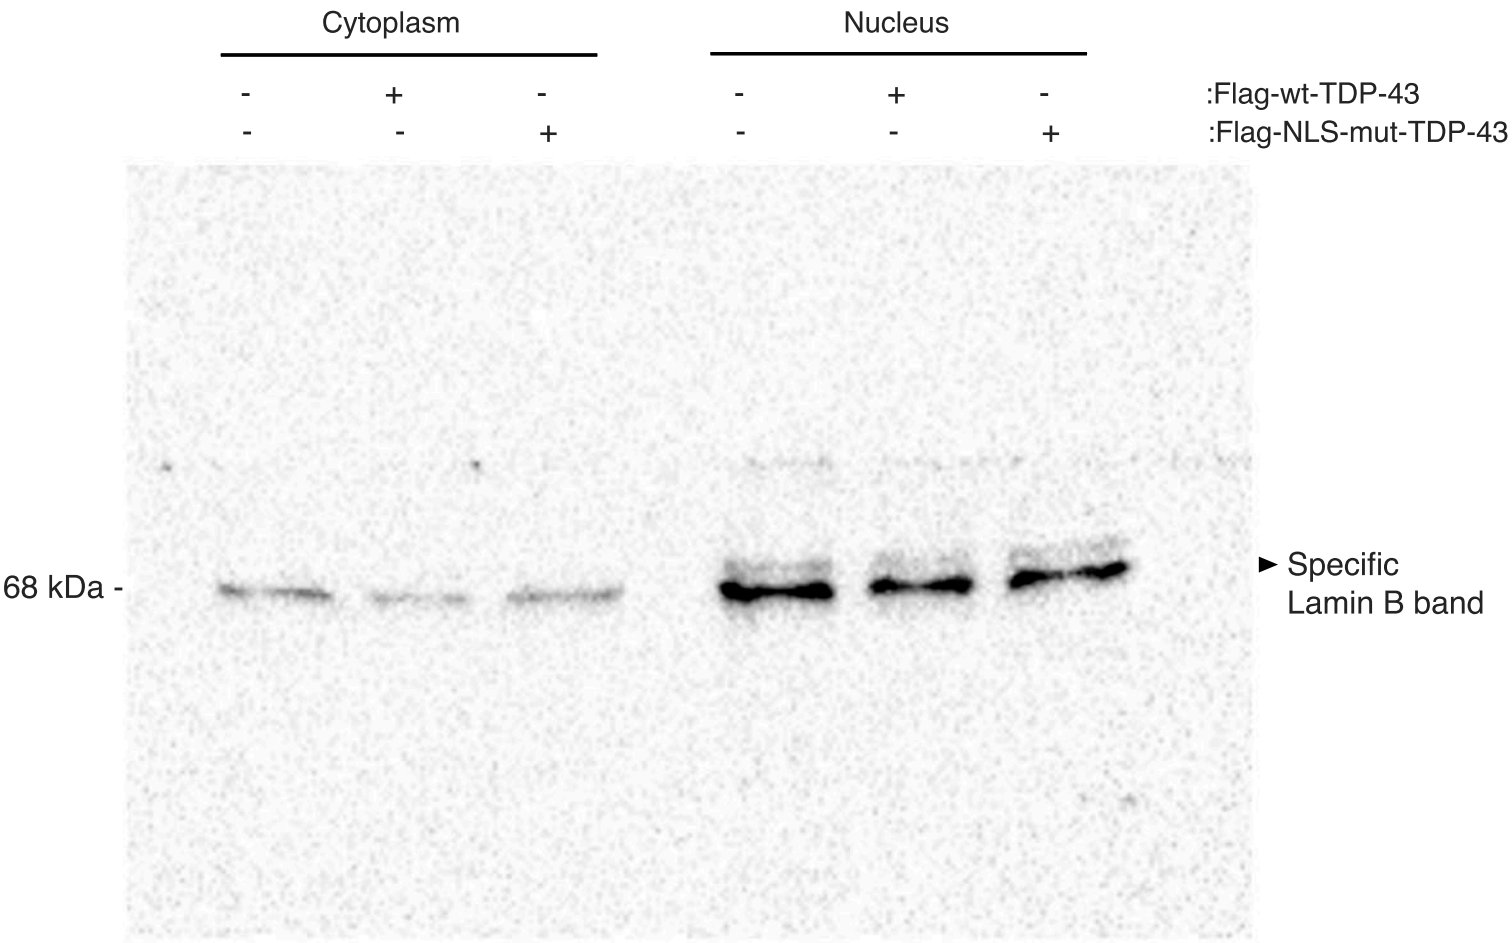

**Figure S1.** Replicate 2 Acetylated  $\alpha$ -tubulin complete gel    Western-blot associated with Figure 1A  
Cabrera-Rodríguez, R., *et al.*

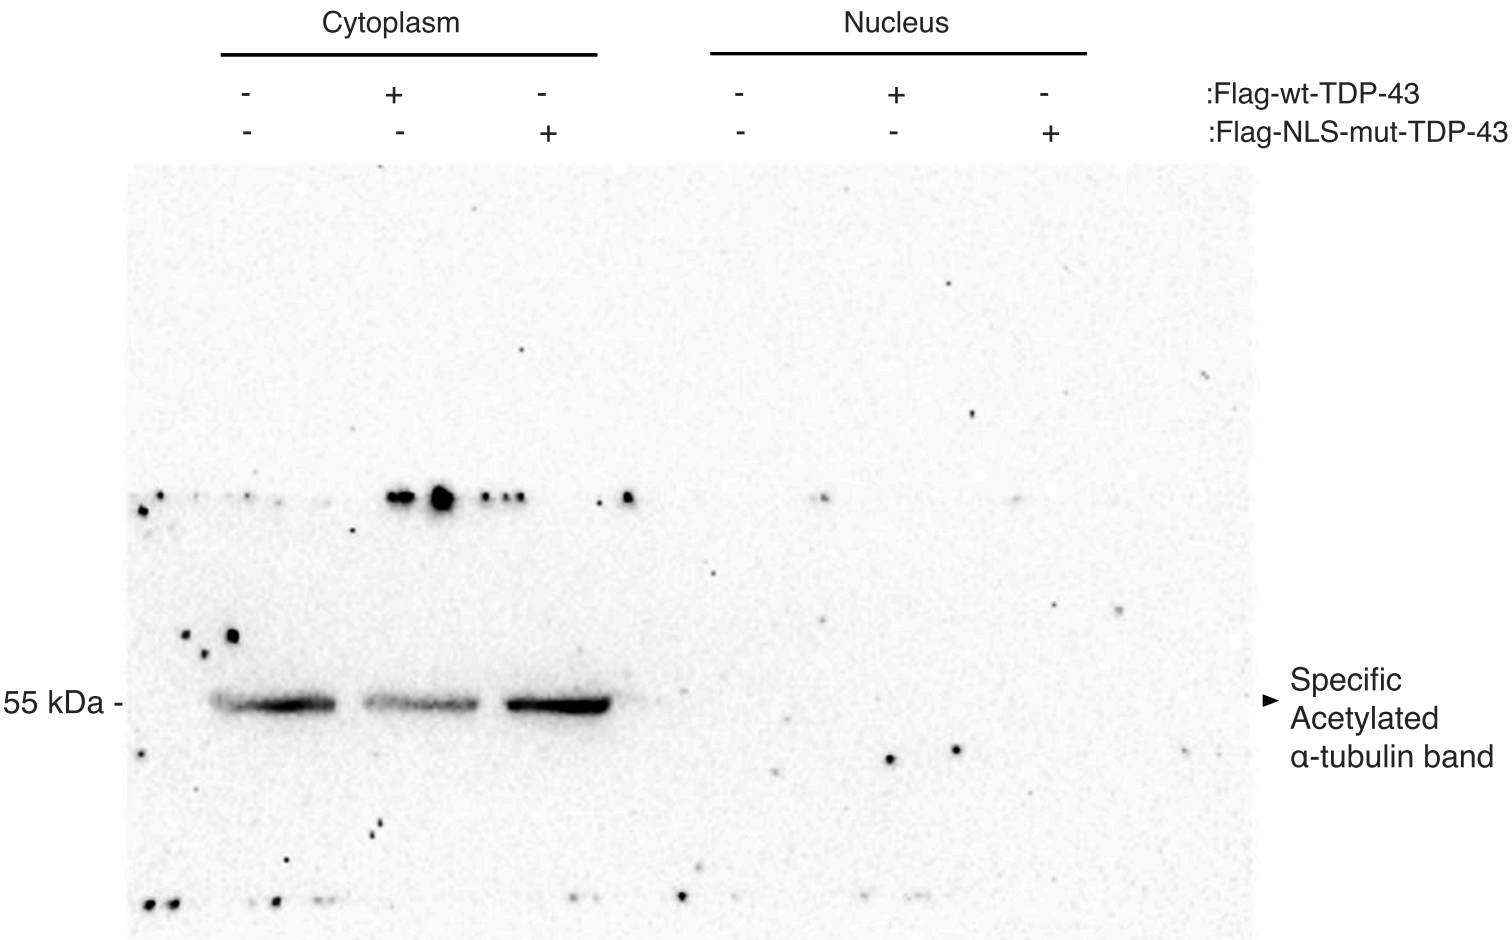

**Figure S1.** Replicate 2 Total  $\alpha$ -tubulin complete gel Western-blot associated with Figure 1A  
Cabrera-Rodríguez, R., *et al.*.

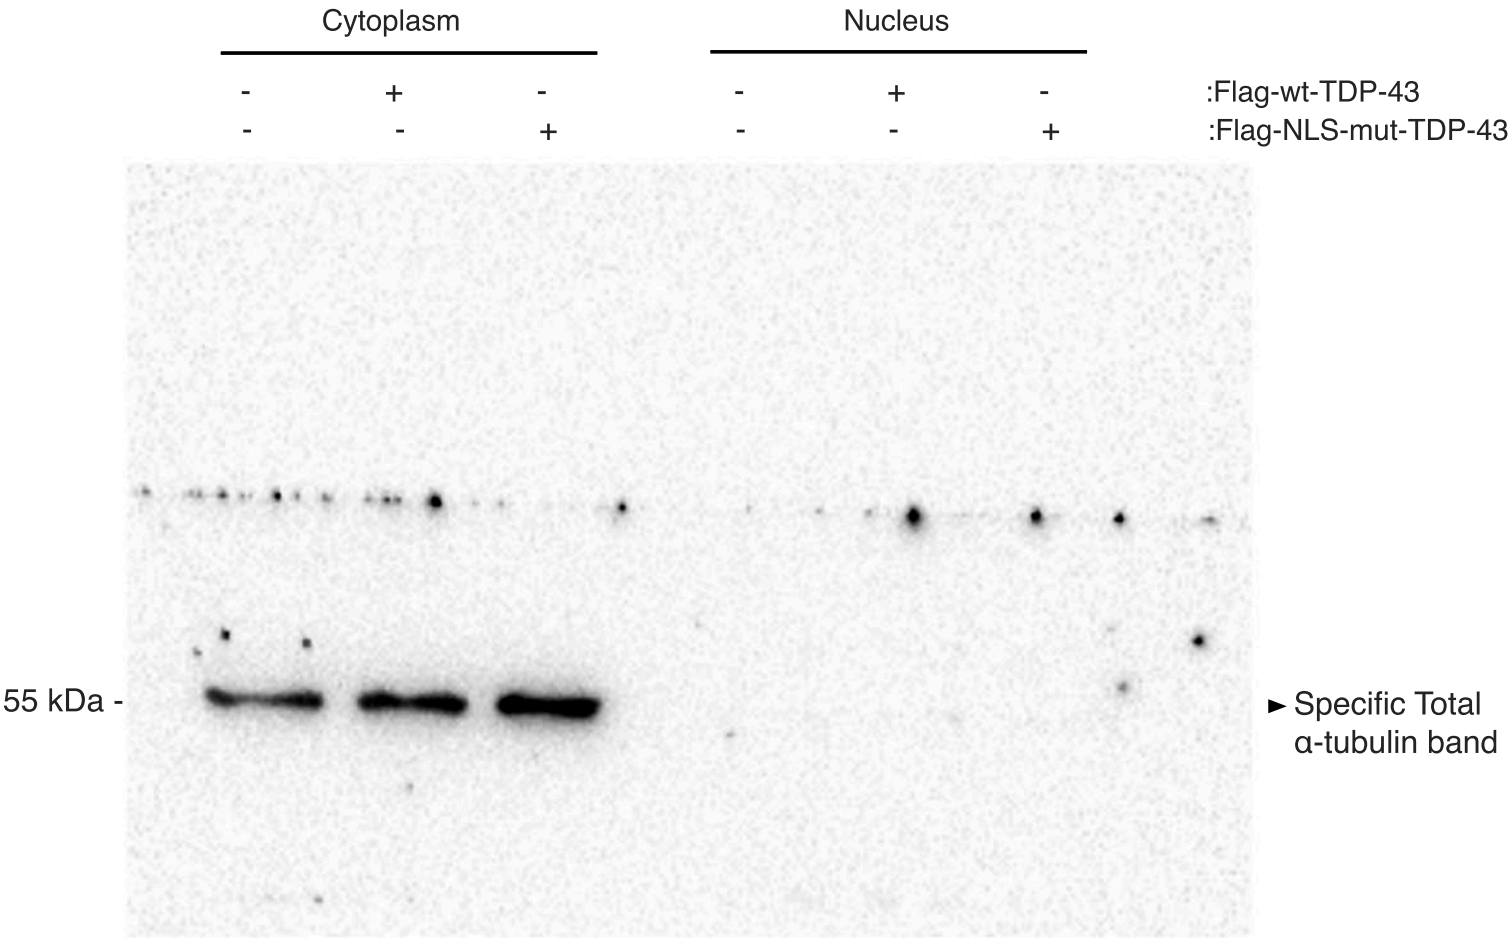

**Figure S1.** Replicate 3 HDAC6 complete gel Western-blot associated with Figure 1A  
Cabrera-Rodríguez, R., *et al.*.

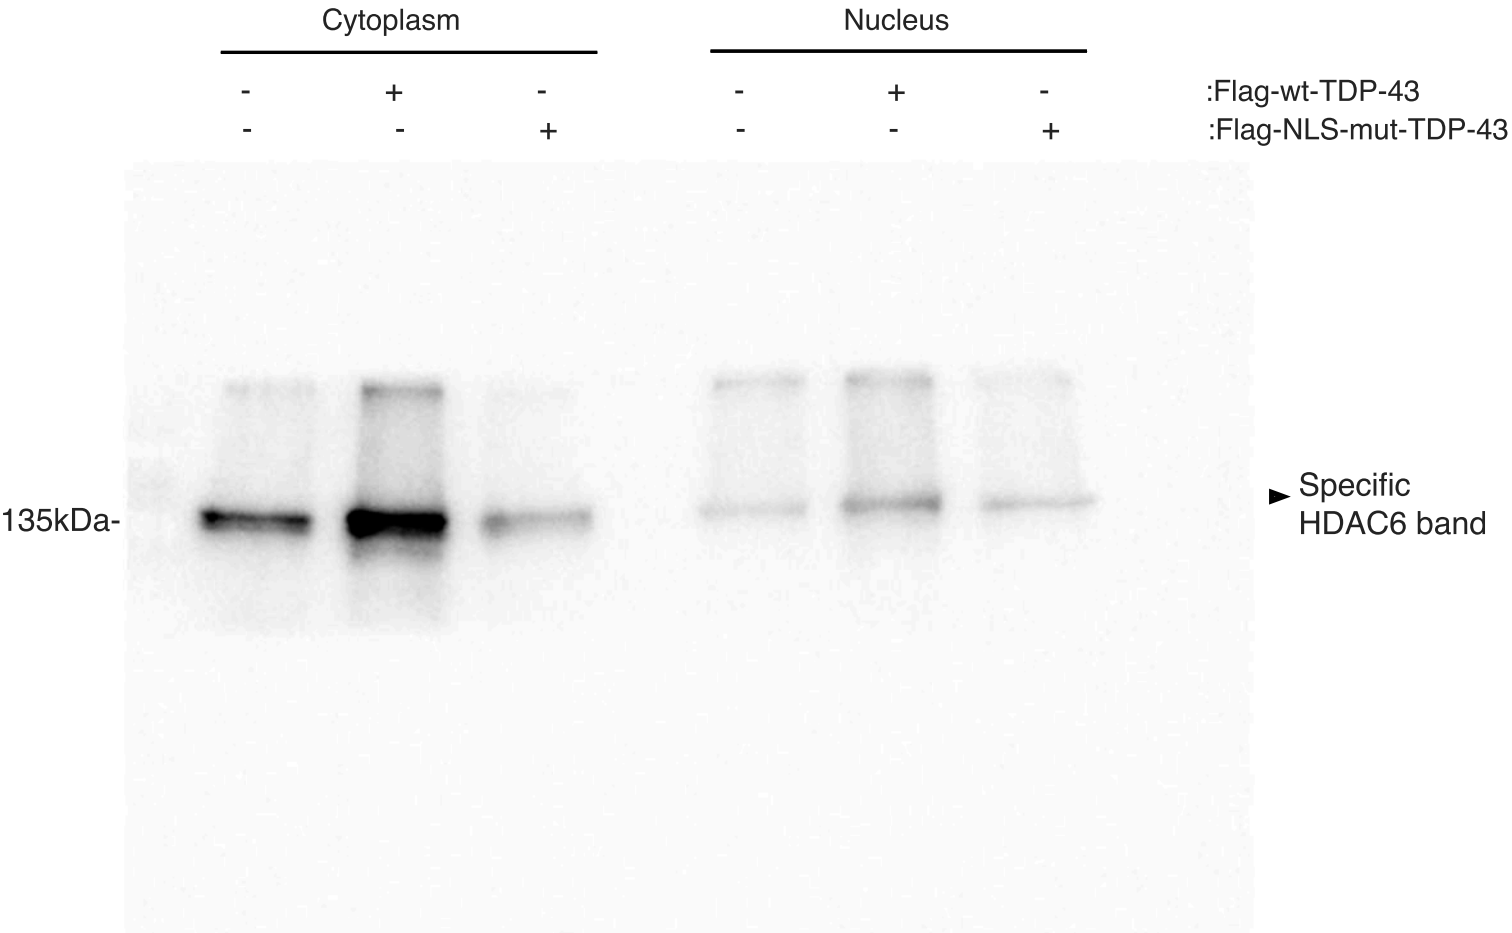

**Figure S1.** Replicate 3 TDP-43 complete gel Western-blot associated with Figure 1A  
Cabrera-Rodríguez, R., *et al.*

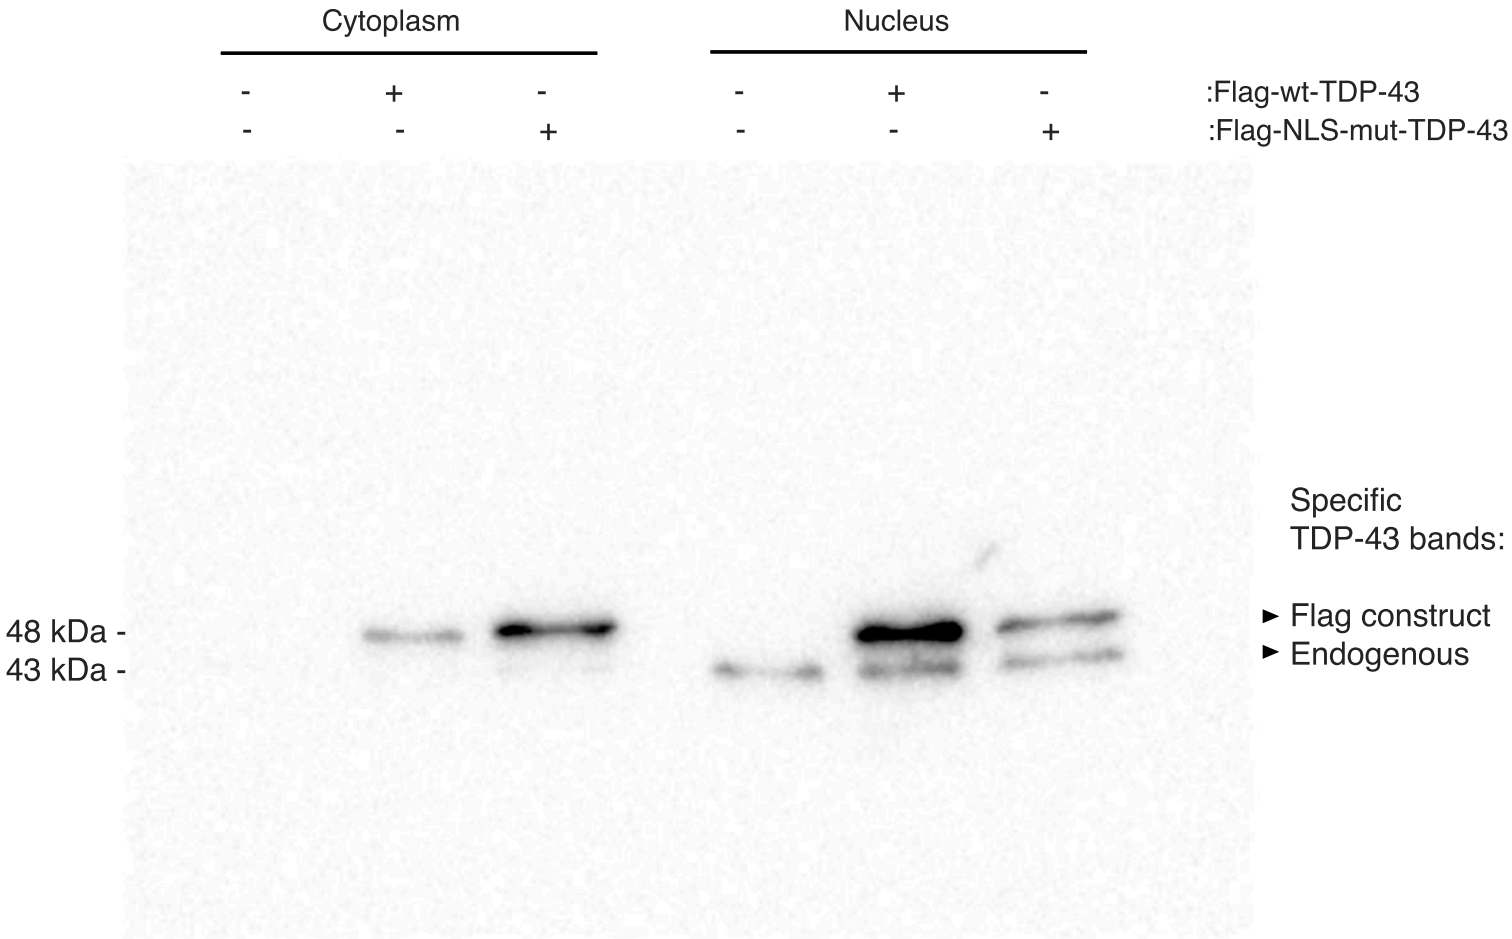

**Figure S1.** Replicate 3 Lamin B complete gel Western-blot associated with Figure 1A  
Cabrera-Rodríguez, R., *et al.*.

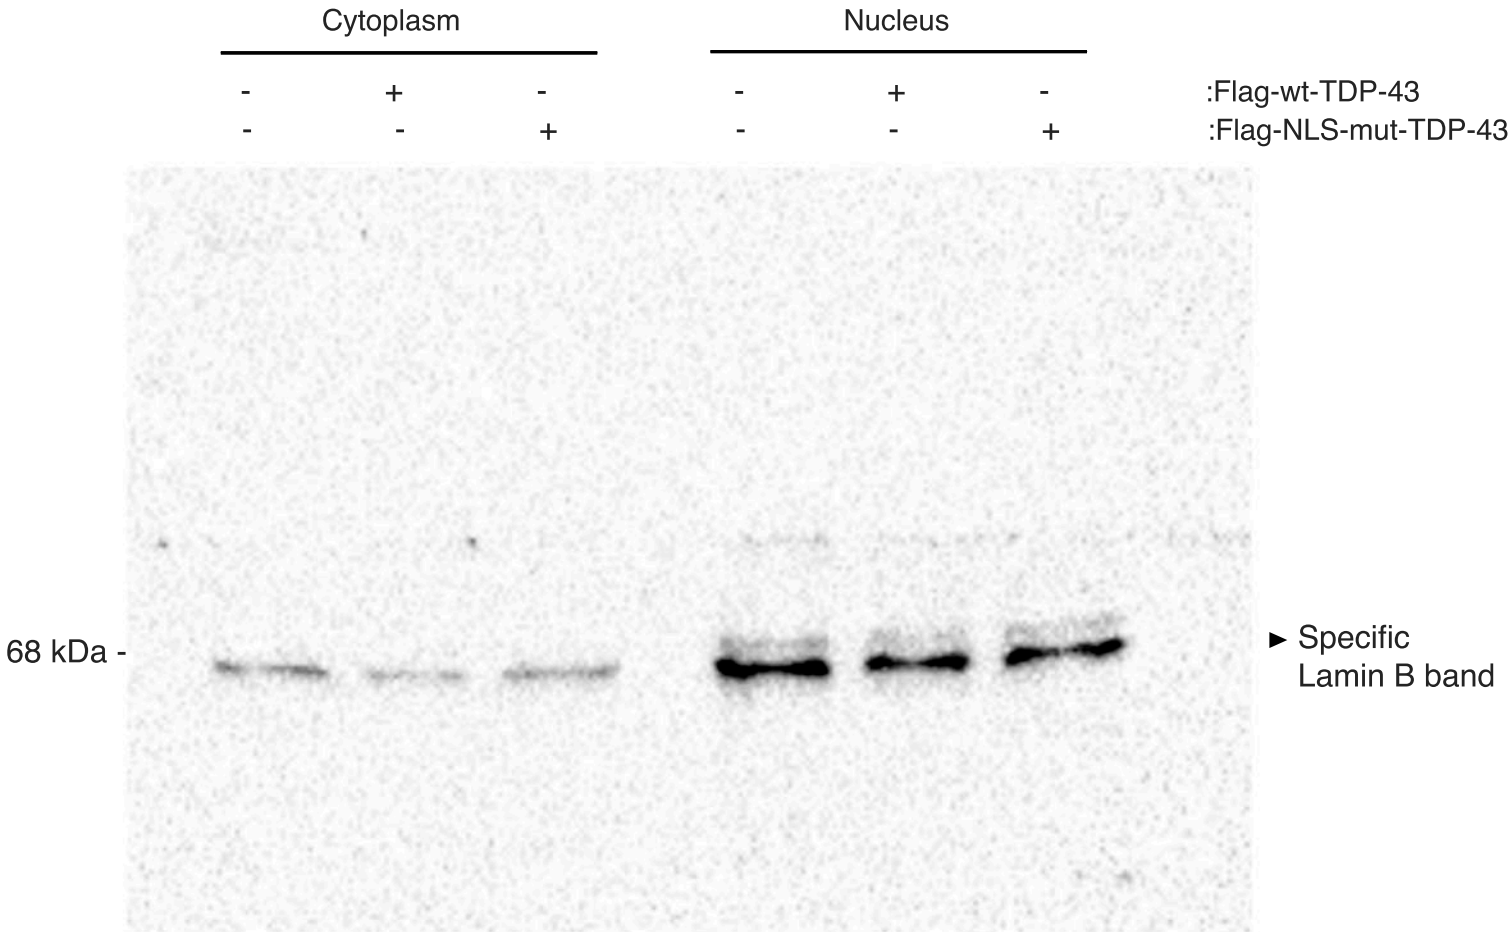

**Figure S1.** Replicate 3 Acetylated  $\alpha$ -tubulin complete gel Western-blot associated with Figure 1A  
Cabrera-Rodríguez, R., *et al.*.

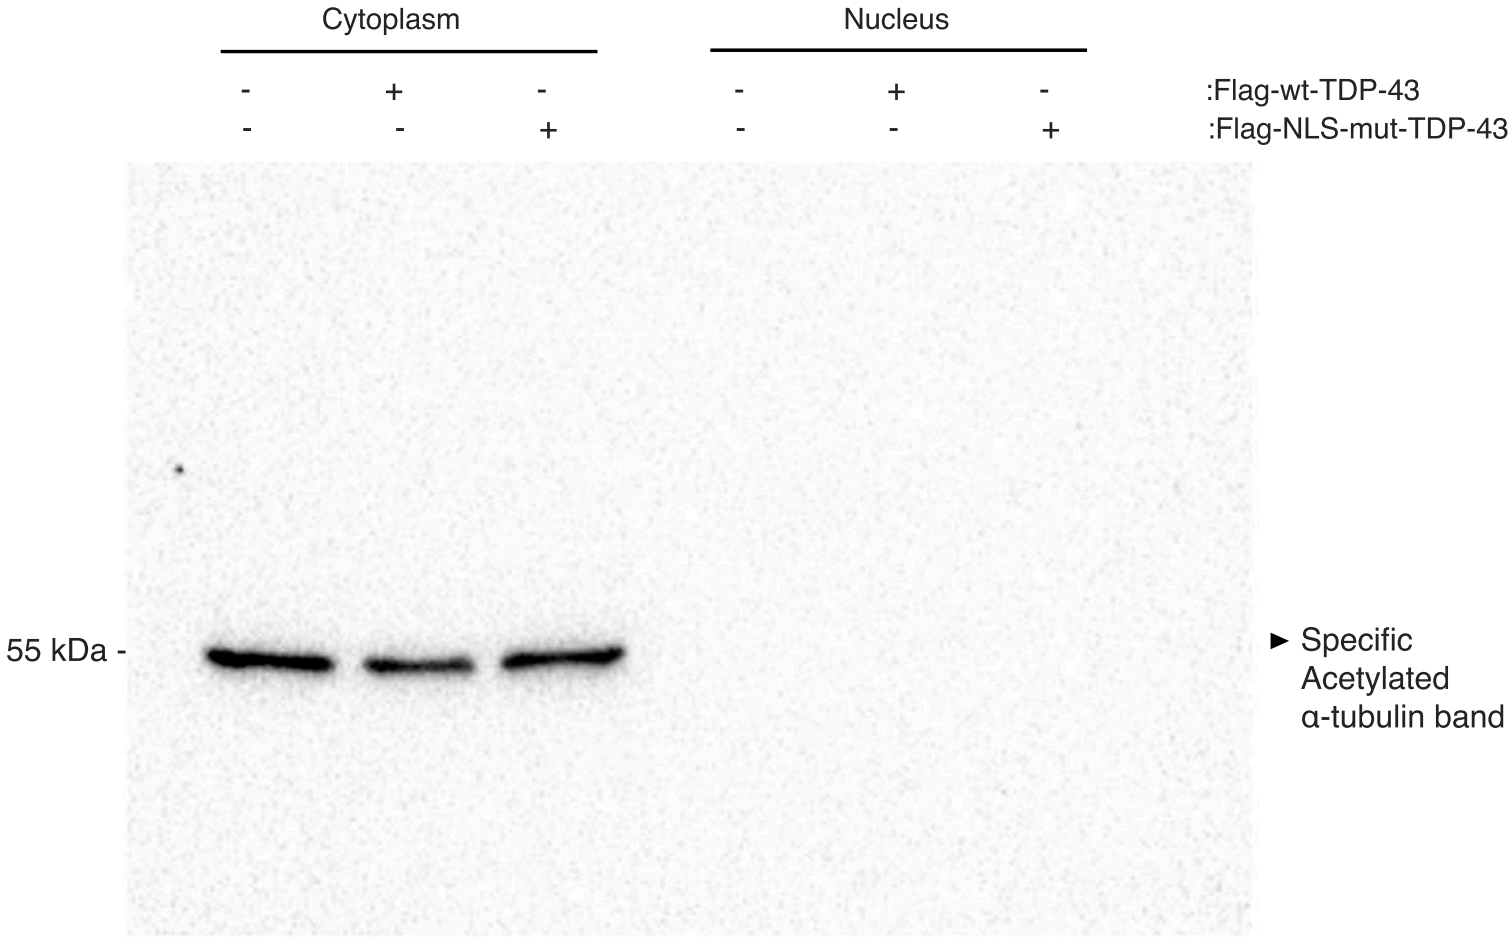

**Figure S1.** Replicate 3 Total  $\alpha$ -tubulin complete gel Western-blot associated with Figure 1A  
Cabrera-Rodríguez, R., *et al.*

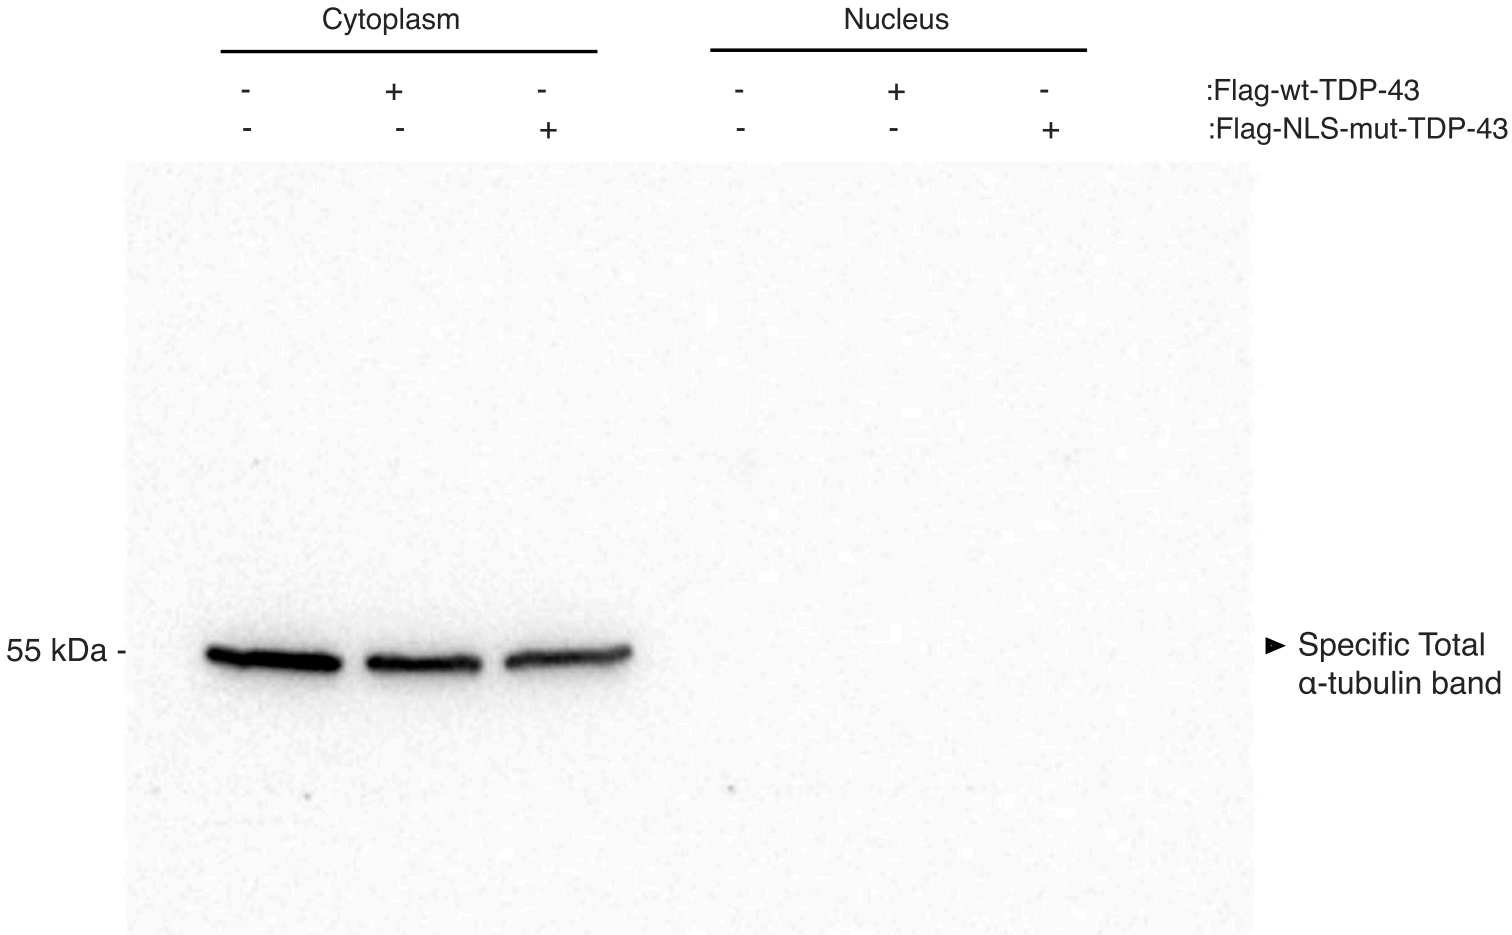



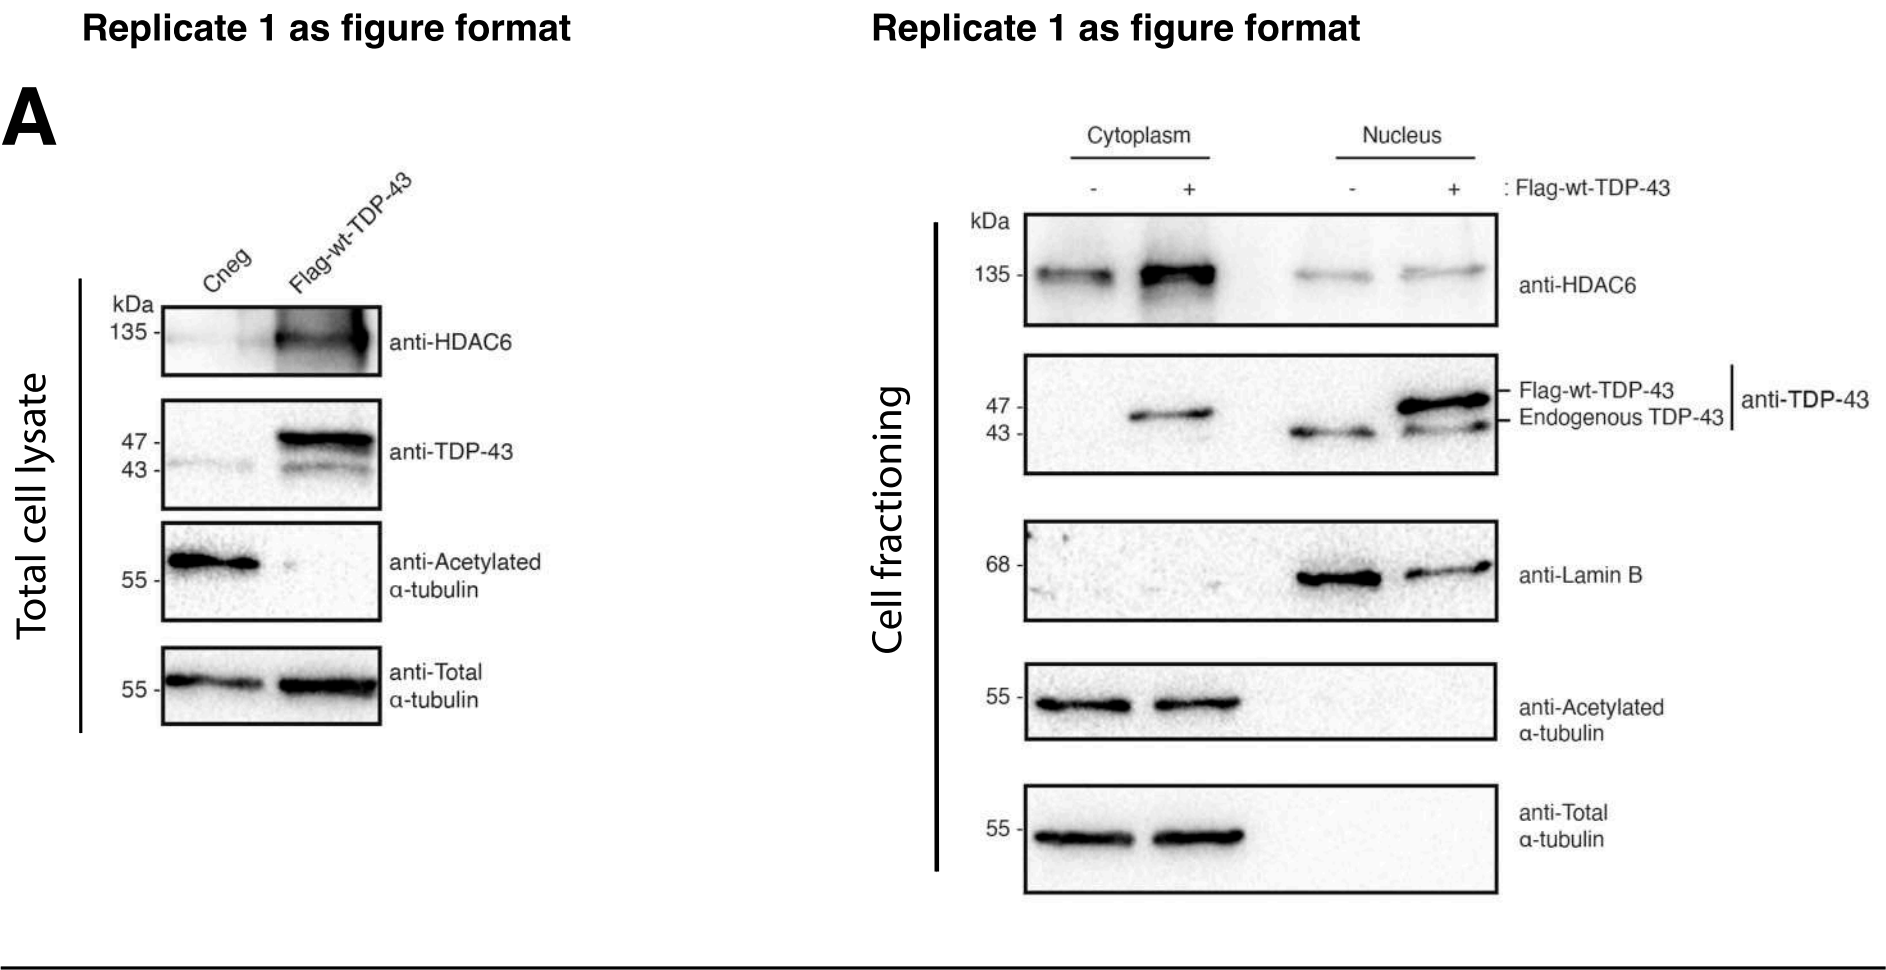

**Figure S2.** Replicate 1 HDAC6 complete gel Western-blot associated with Figure 3A  
Cabrera-Rodríguez, R., *et al.*

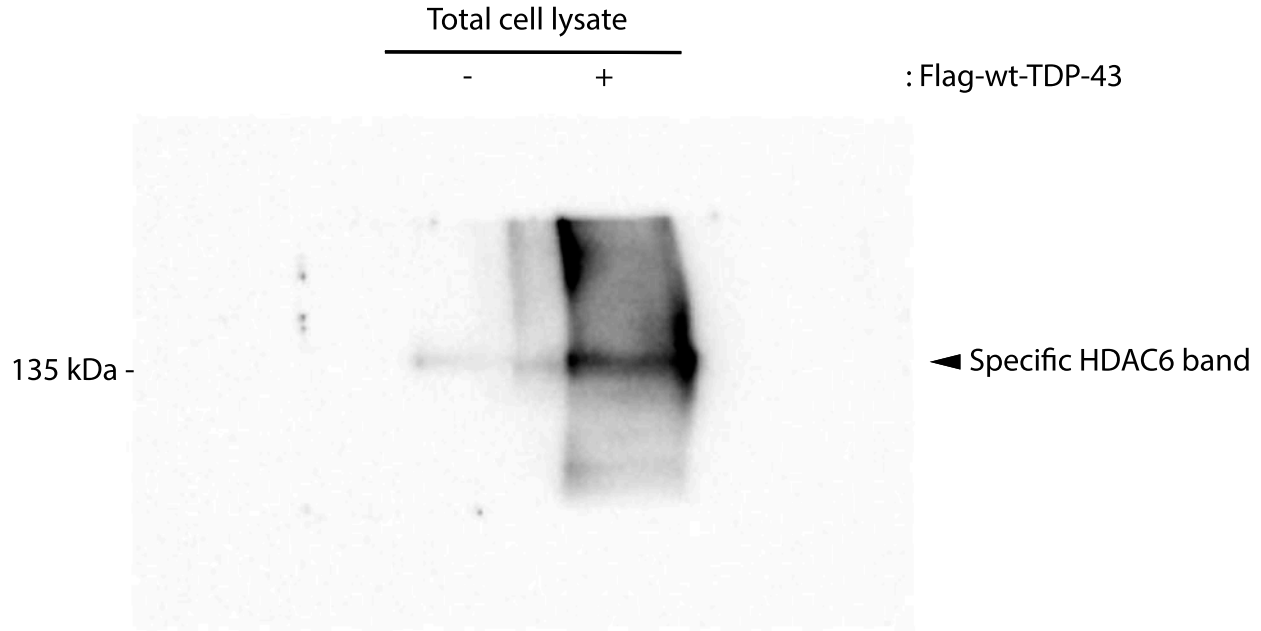

**Figure S2.** Replicate 1 TDP-43 complete gel Western-blot associated with Figure 3A  
Cabrera-Rodríguez, R., *et al.*

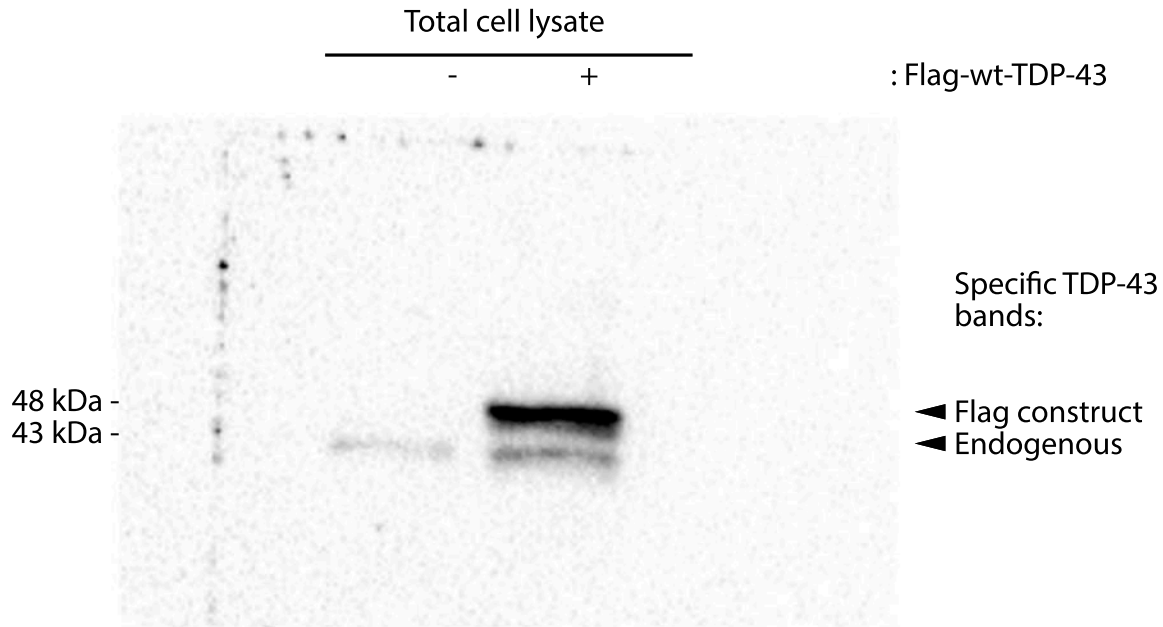

**Figure S2.** Replicate 1 Acetylated  $\alpha$ -tubulin complete gel Western-blot associated with Figure 3A  
Cabrera-Rodríguez, R., *et al.*

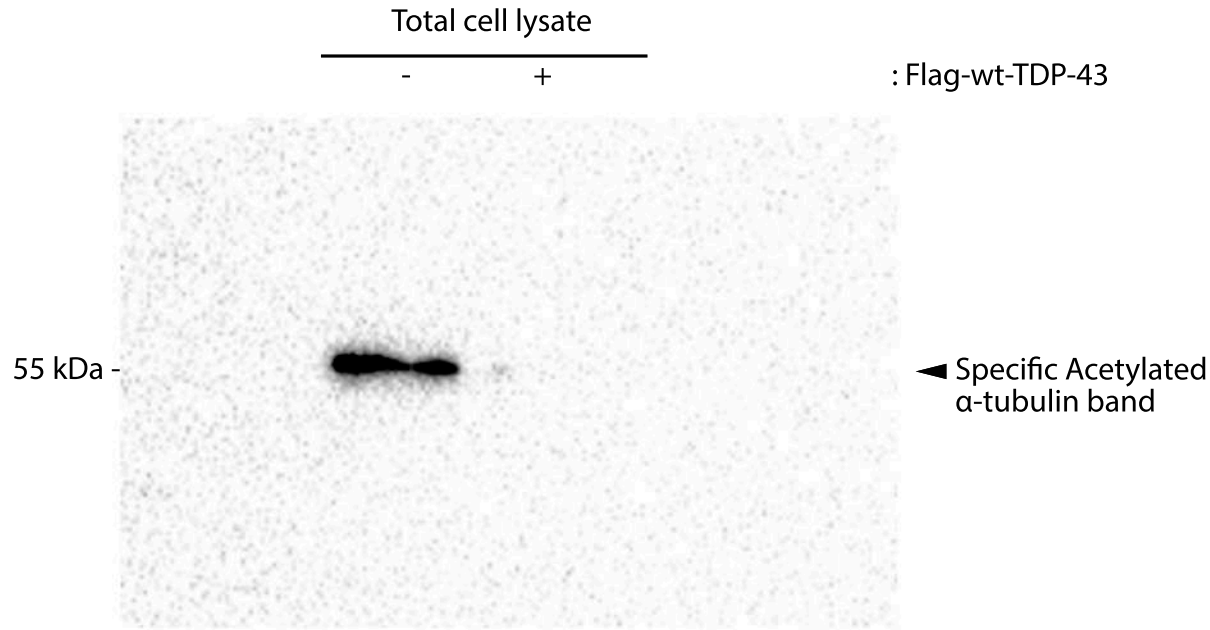

**Figure S2.** Replicate 1 Total  $\alpha$ -tubulin complete gel Western-blot associated with Figure 3A  
Cabrera-Rodríguez, R., *et al.*

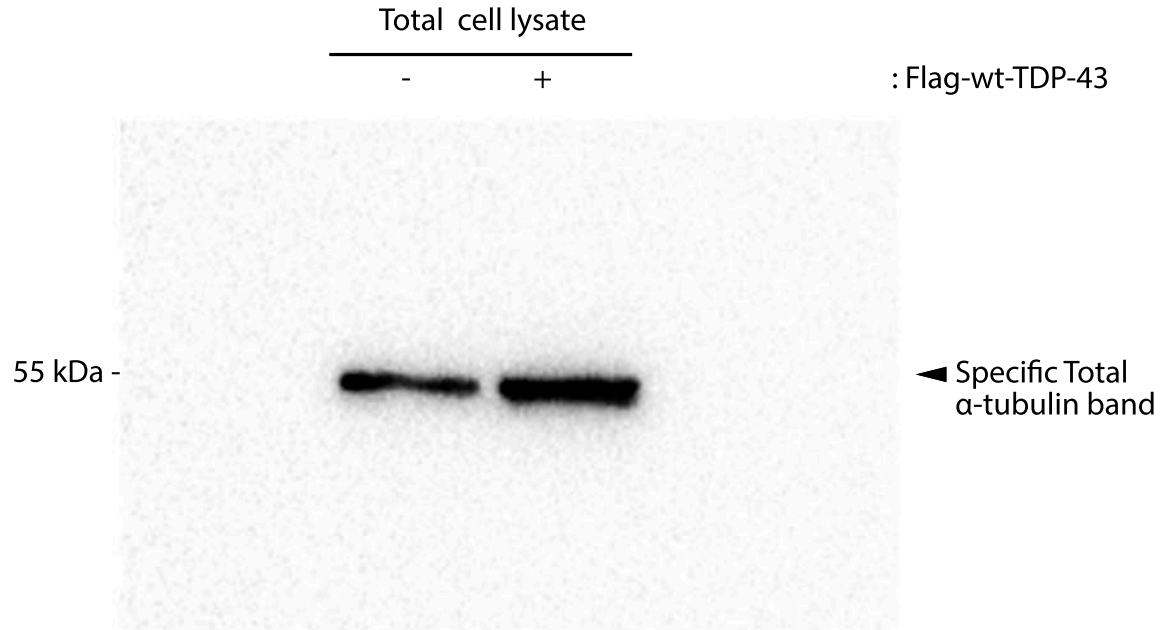

**Figure S2.** Replicate 1 HDAC6 complete gel Western-blot associated with Figure 3A  
Cabrera-Rodríguez, R., *et al.*

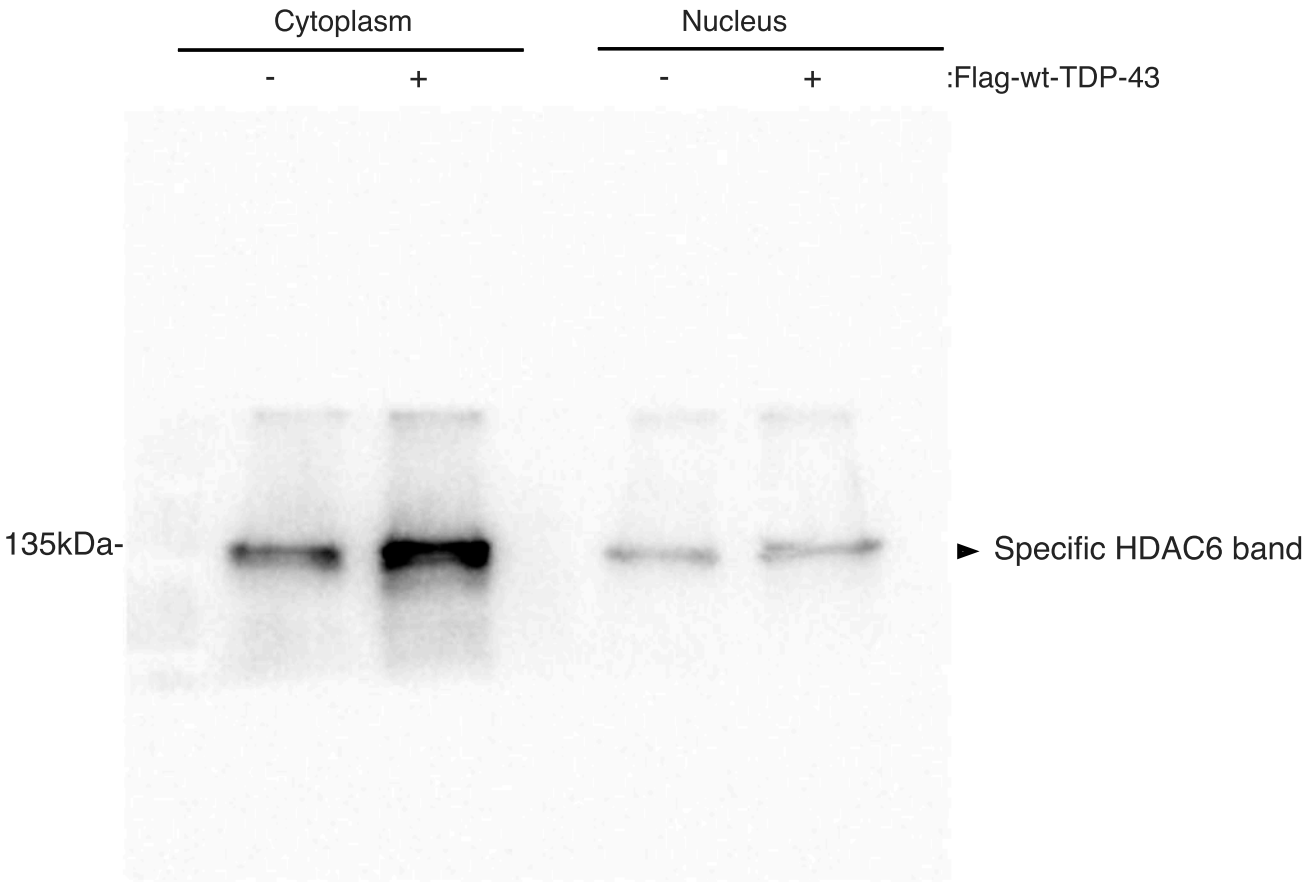

**Figure S2.** Replicate 1 TDP-43 complete gel Western-blot associated with Figure 3A  
Cabrera-Rodríguez, R., *et al.*

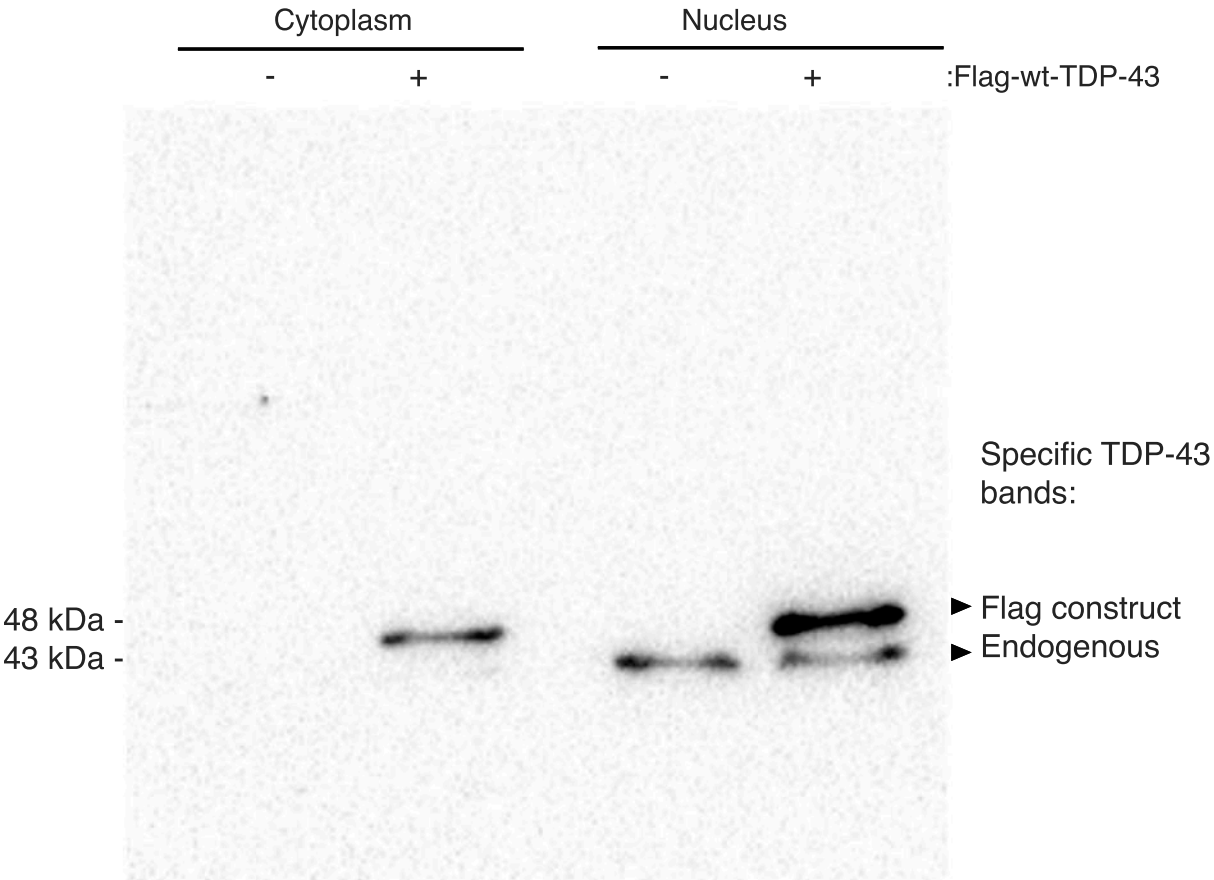

**Figure S2.** Replicate 1 Lamin B complete gel Western-blot associated with Figure 3A  
Cabrera-Rodríguez, R., *et al.*

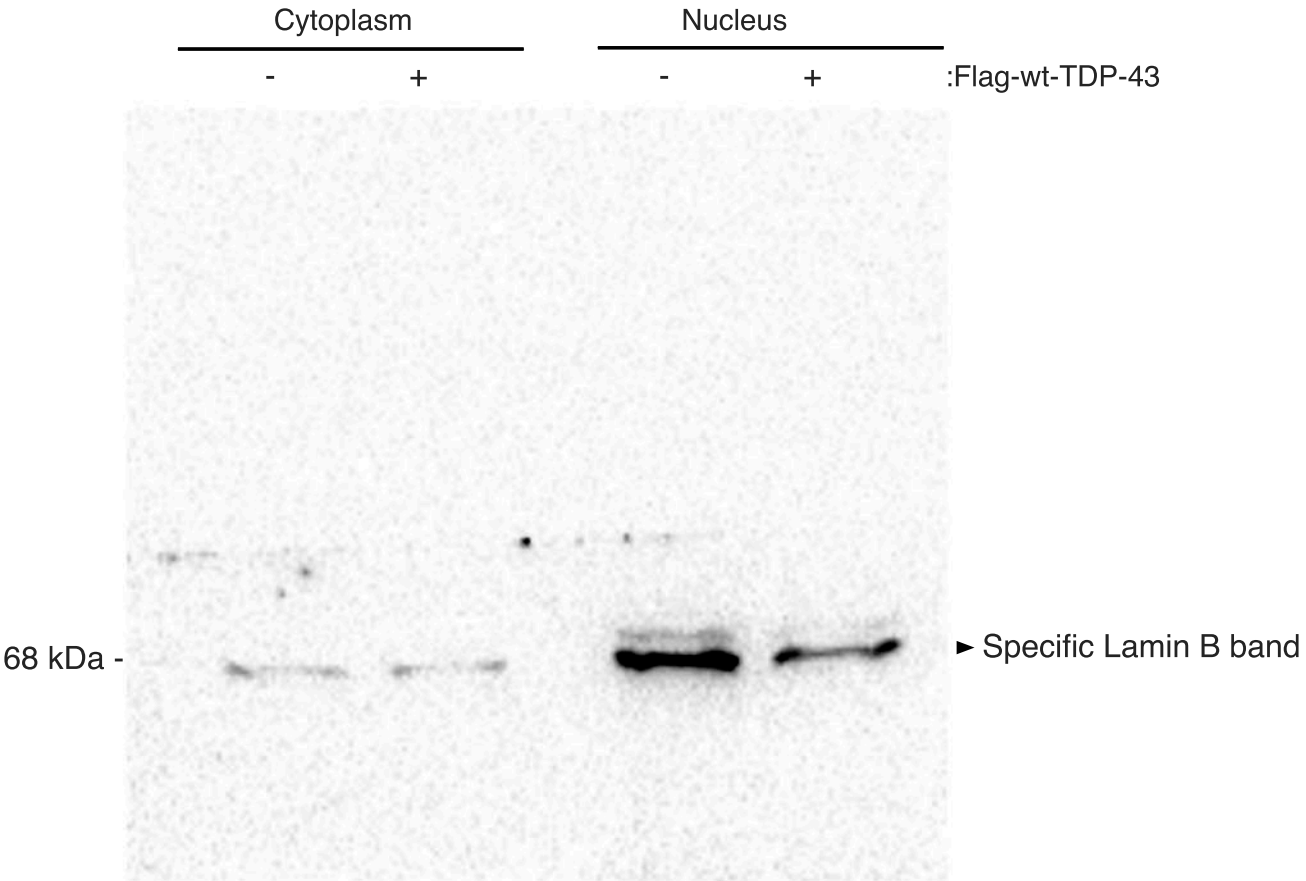



**Figure S2.** Replicate 1 Acetylated  $\alpha$ -tubulin complete gel Western-blot associated with Figure 3A  
Cabrera-Rodríguez, R., *et al.*

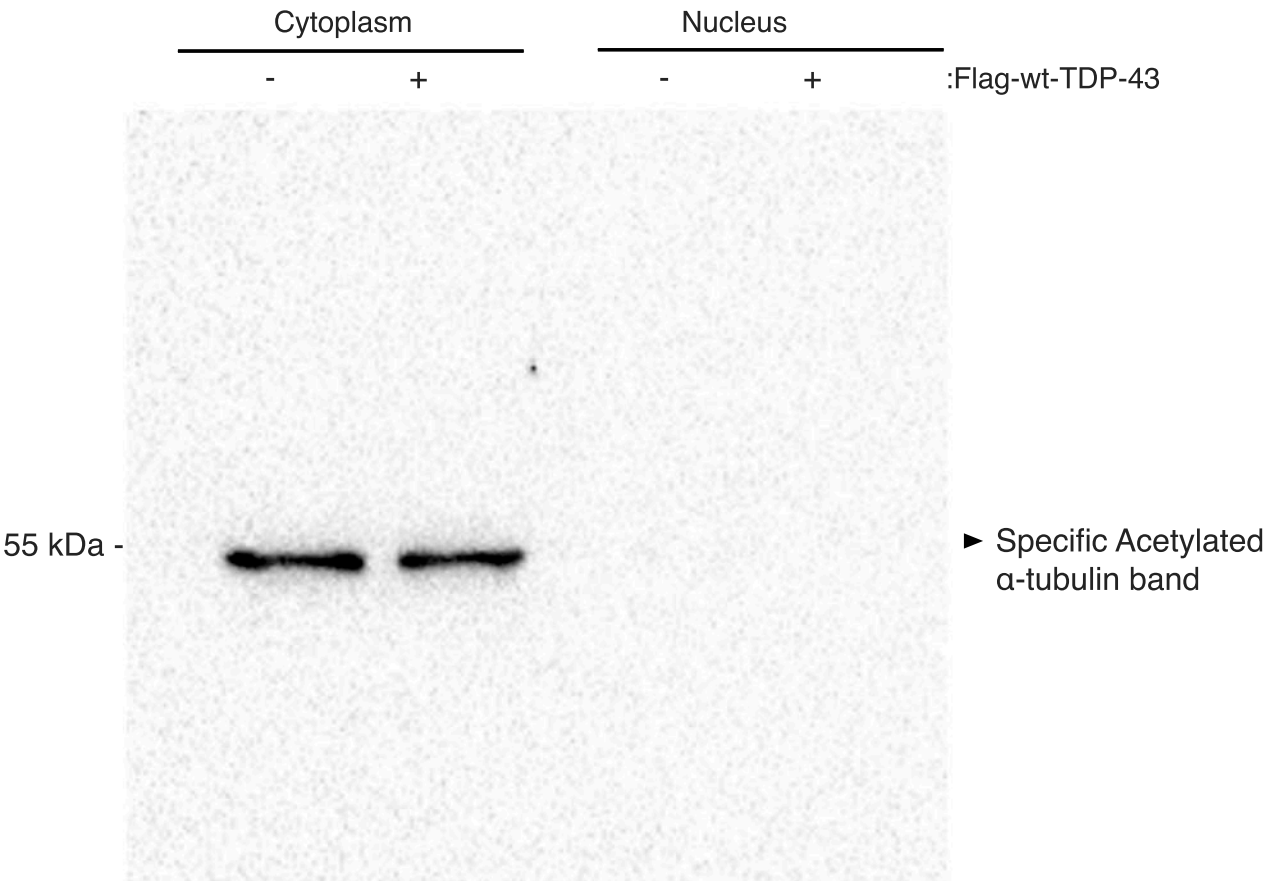

**Figure S2.** Replicate 1 Total  $\alpha$ -tubulin complete gel Western-blot associated with Figure 3A  
Cabrera-Rodríguez, R., *et al.*

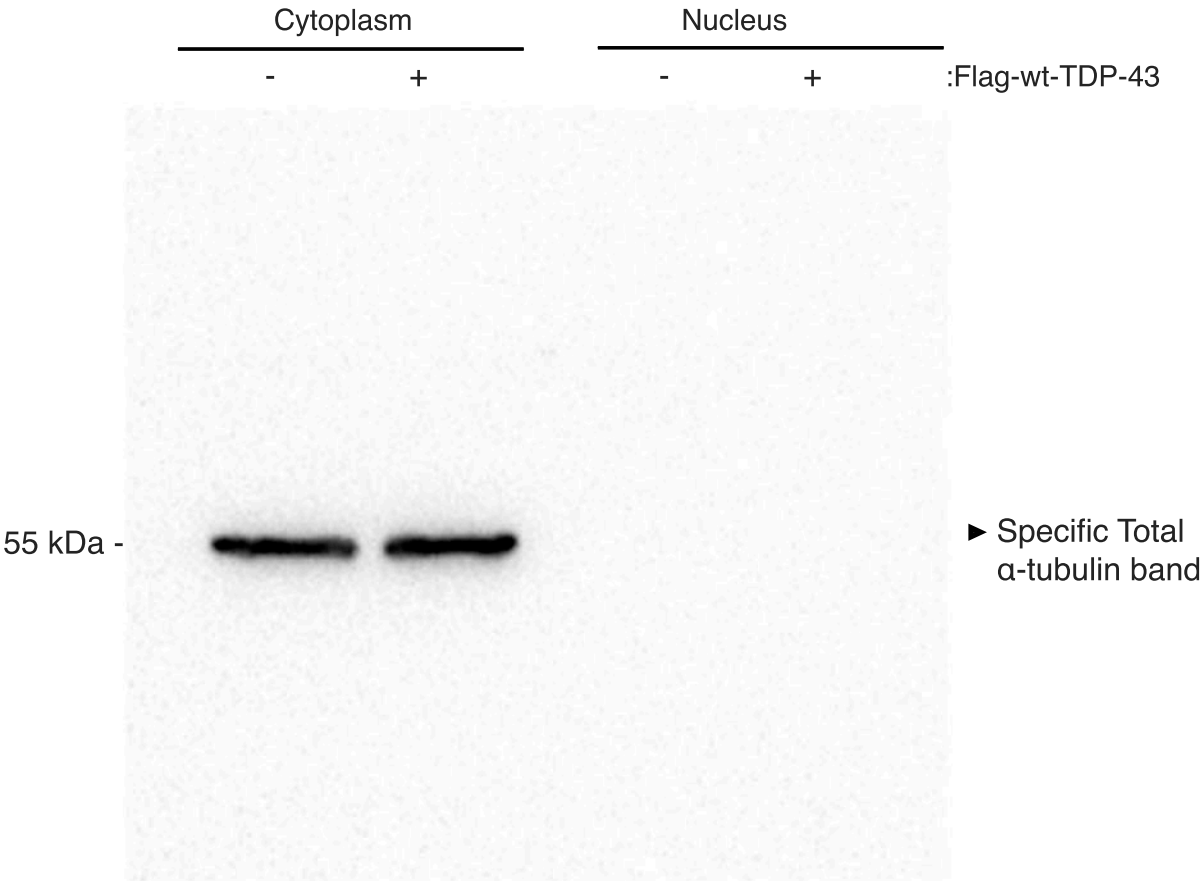

**Figure S2.** Replicate 2 HDAC6 complete gel Western-blot associated with Figure 3A  
Cabrera-Rodríguez, R., *et al.*

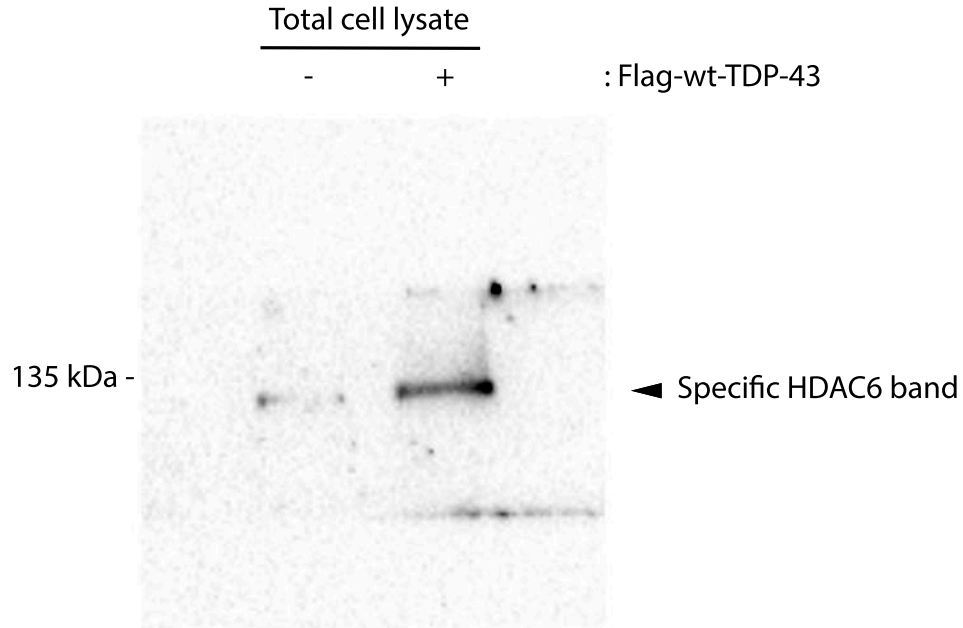

**Figure S2.** Replicate 2 TDP-43 complete gel Western-blot associated with Figure 3A  
Cabrera-Rodríguez, R., *et al.*

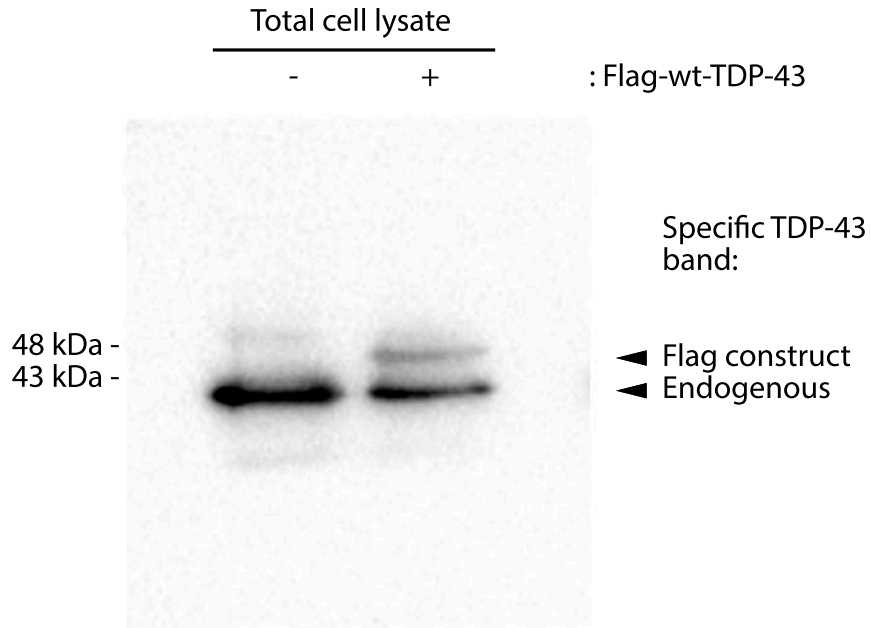

**Figure S2.** Replicate 2 Acetylated  $\alpha$ -tubulin complete gel Western-blot associated with Figure 3A  
Cabrera-Rodríguez, R., *et al.*

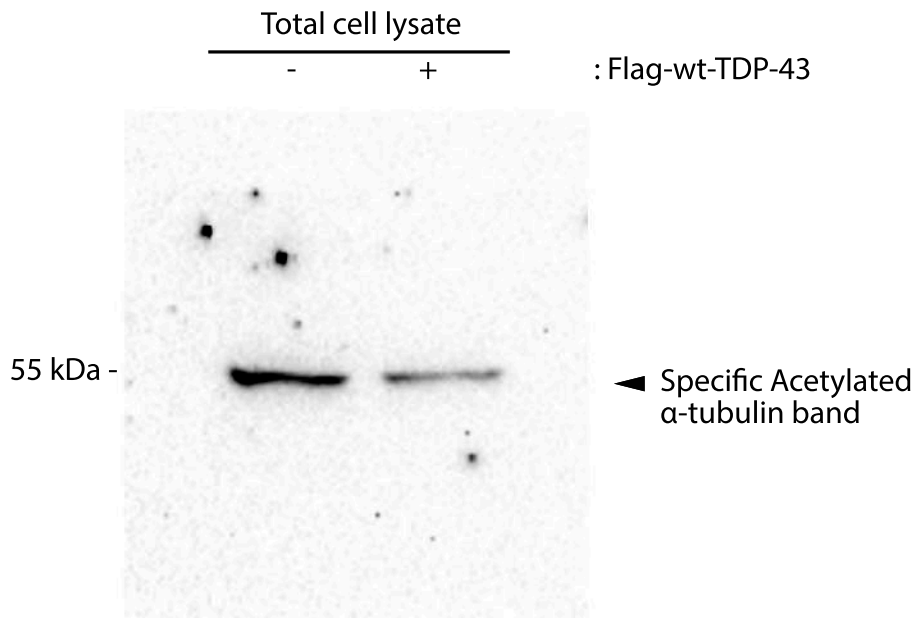

**Figure S2.** Replicate 2 Total  $\alpha$ -tubulin complete gel Western-blot associated with Figure 3A  
Cabrera-Rodríguez, R., *et al.*

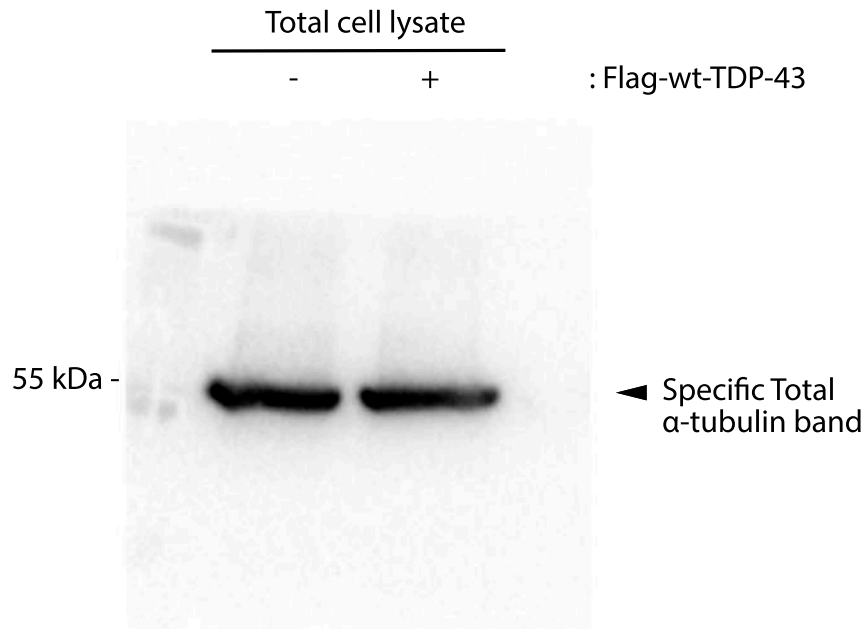

**Figure S2.** Replicate 2 HDAC6 complete gel Western-blot associated with Figure 3A  
Cabrera-Rodríguez, R., *et al.*

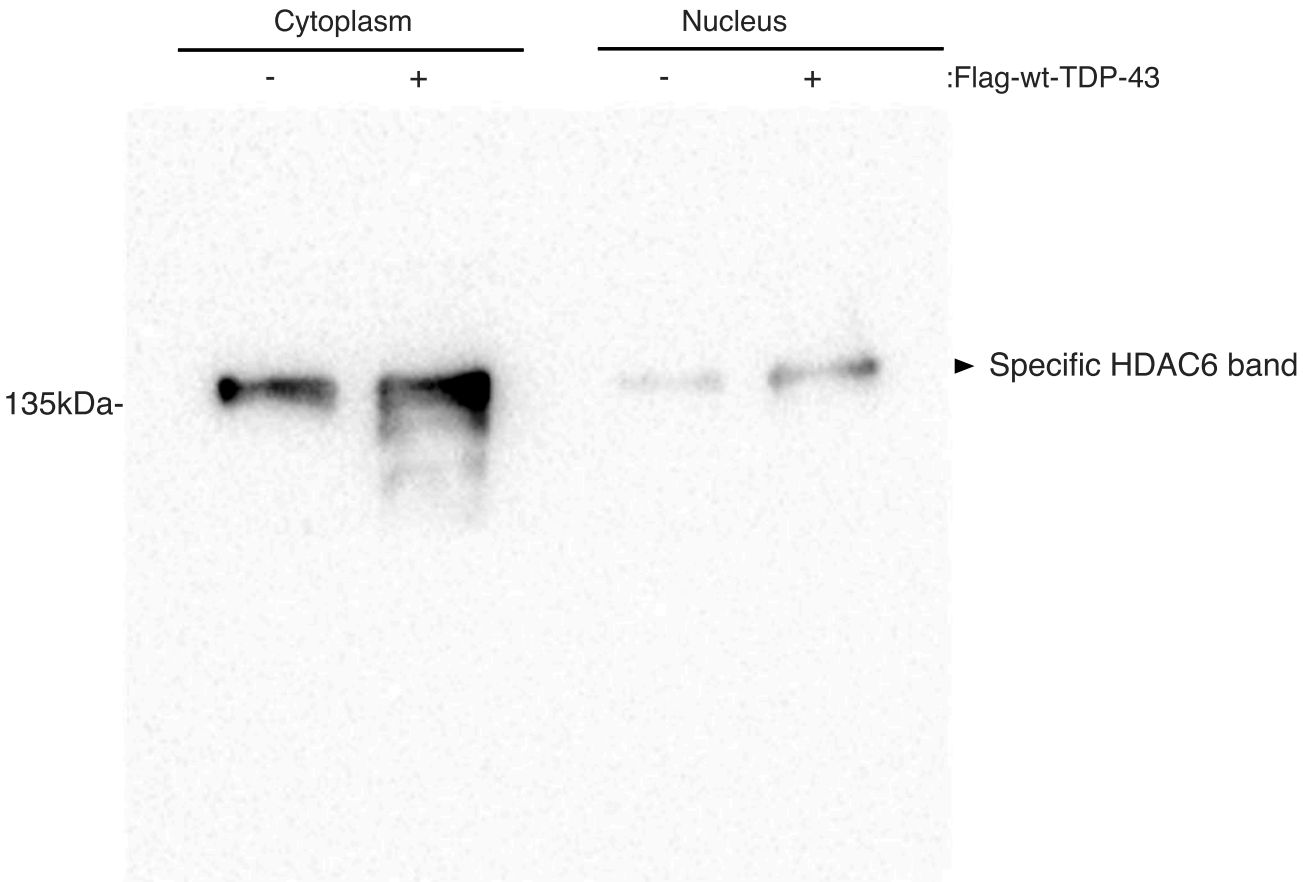

**Figure S2.** Replicate 2 TDP-43 complete gel Western-blot associated with Figure 3A  
Cabrera-Rodríguez, R., *et al.*

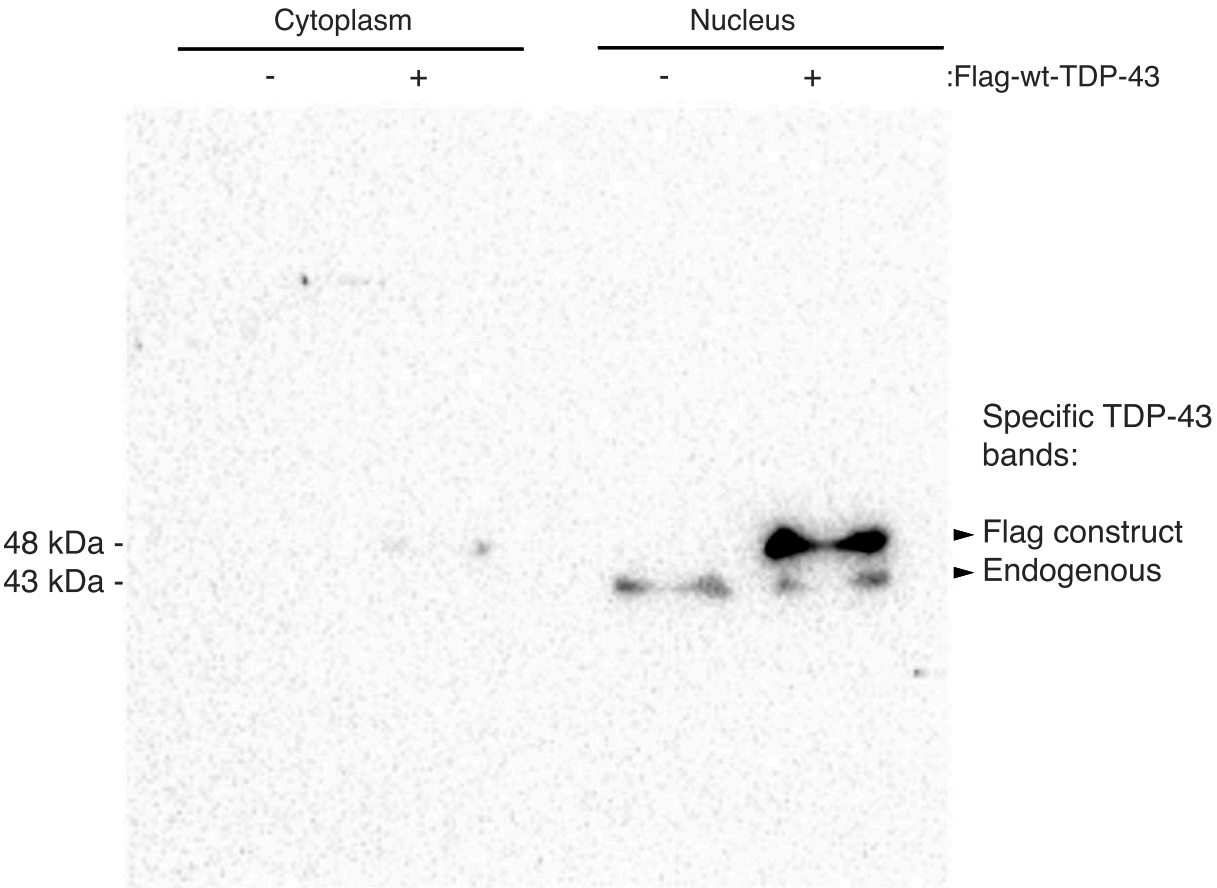



**Figure S2.** Replicate 2 Lamin B complete gel Western-blot associated with Figure 3A  
Cabrera-Rodríguez, R., *et al.*

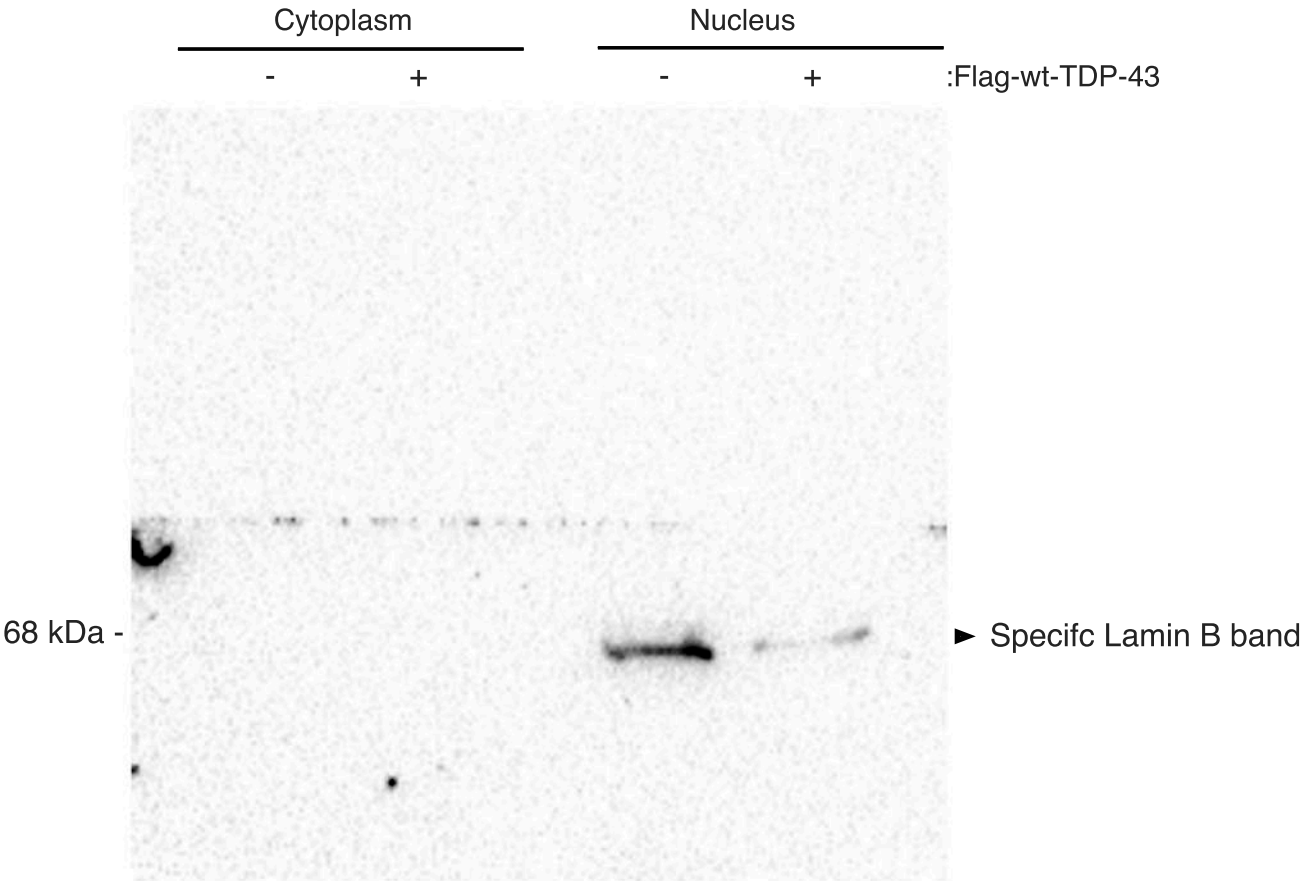

**Figure S2.** Replicate 2 Acetylated  $\alpha$ -tubulin complete gel Western-blot associated with Figure 3A  
Cabrera-Rodríguez, R., *et al.*

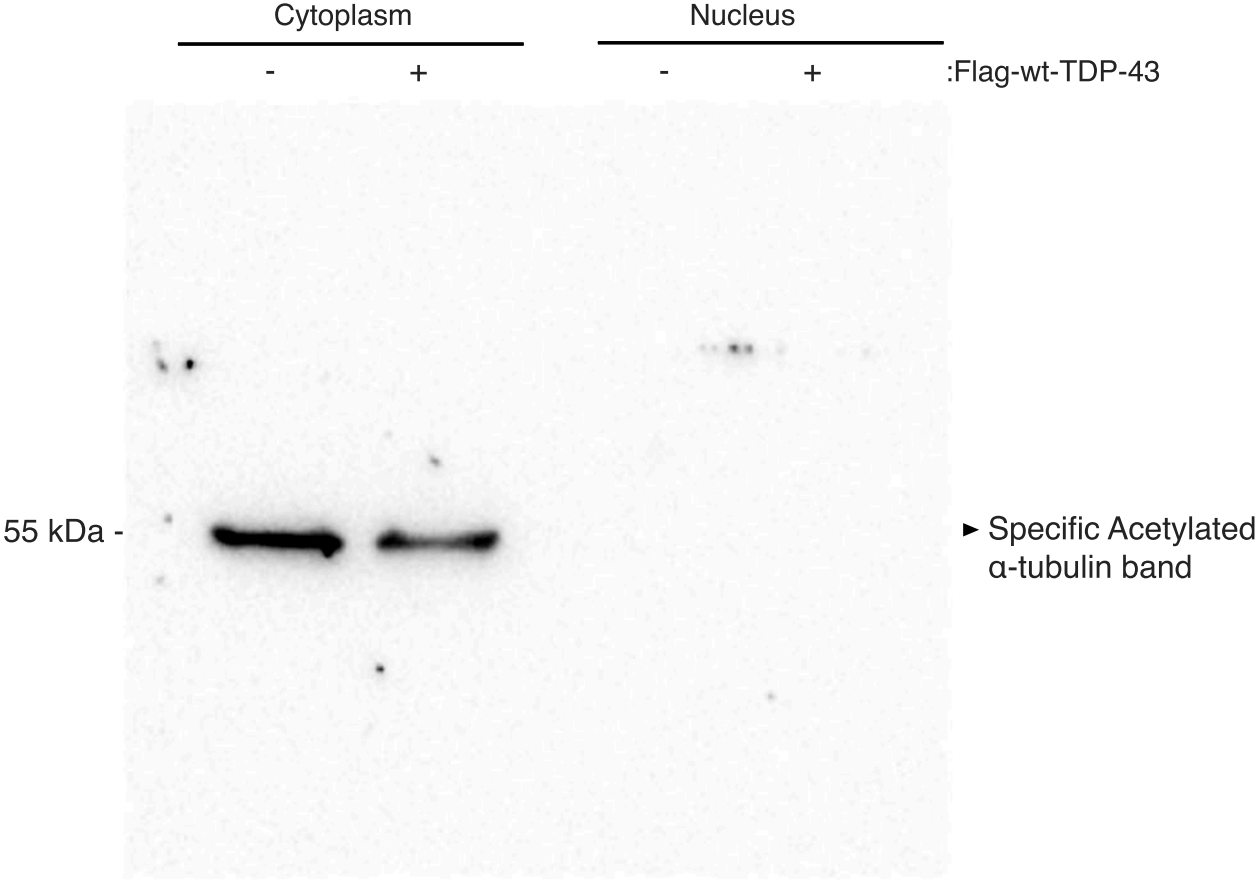

**Figure S2.** Replicate 2 Total  $\alpha$ -tubulin complete gel Western-blot associated with Figure 3A  
Cabrera-Rodríguez, R., *et al.*

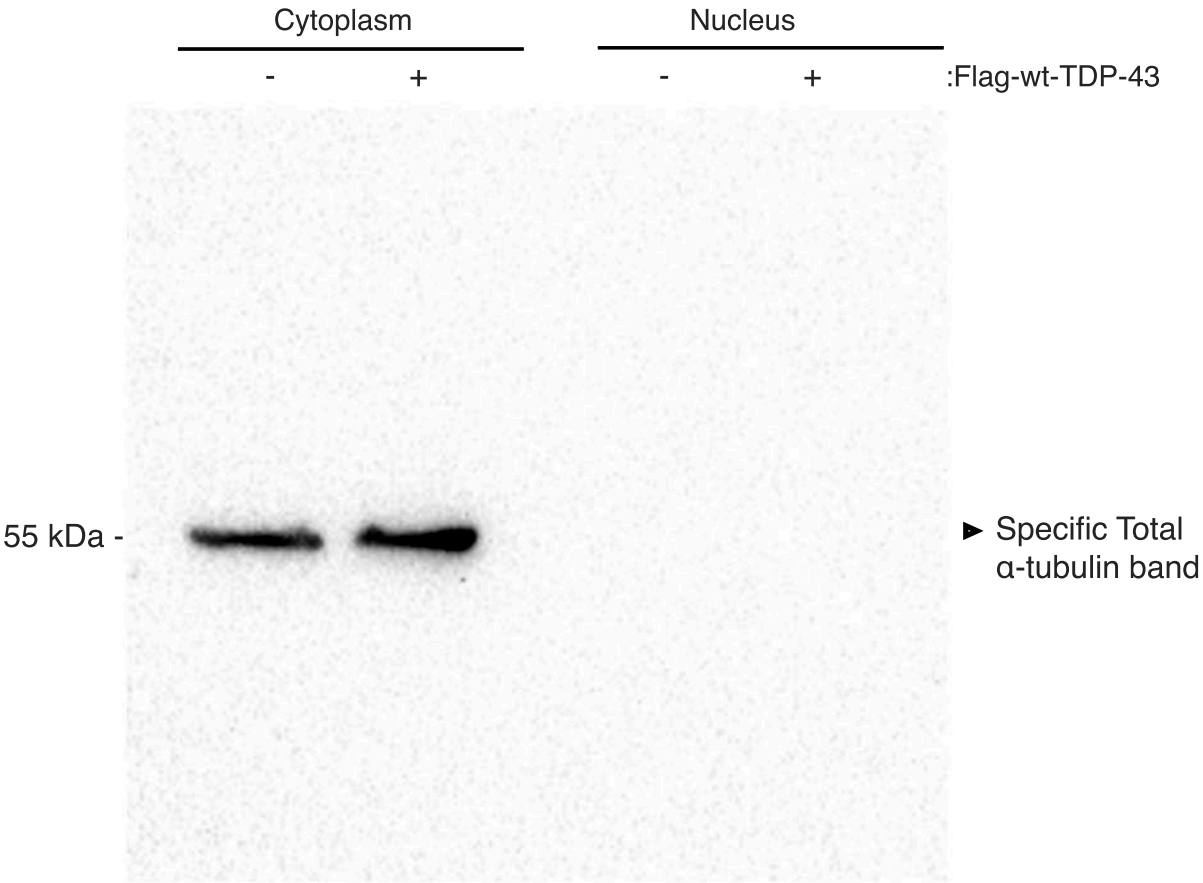

**Figure S2.** Replicate 3 HDAC6 complete gel Western-blot associated with Figure 3A  
Cabrera-Rodríguez, R., *et al.*

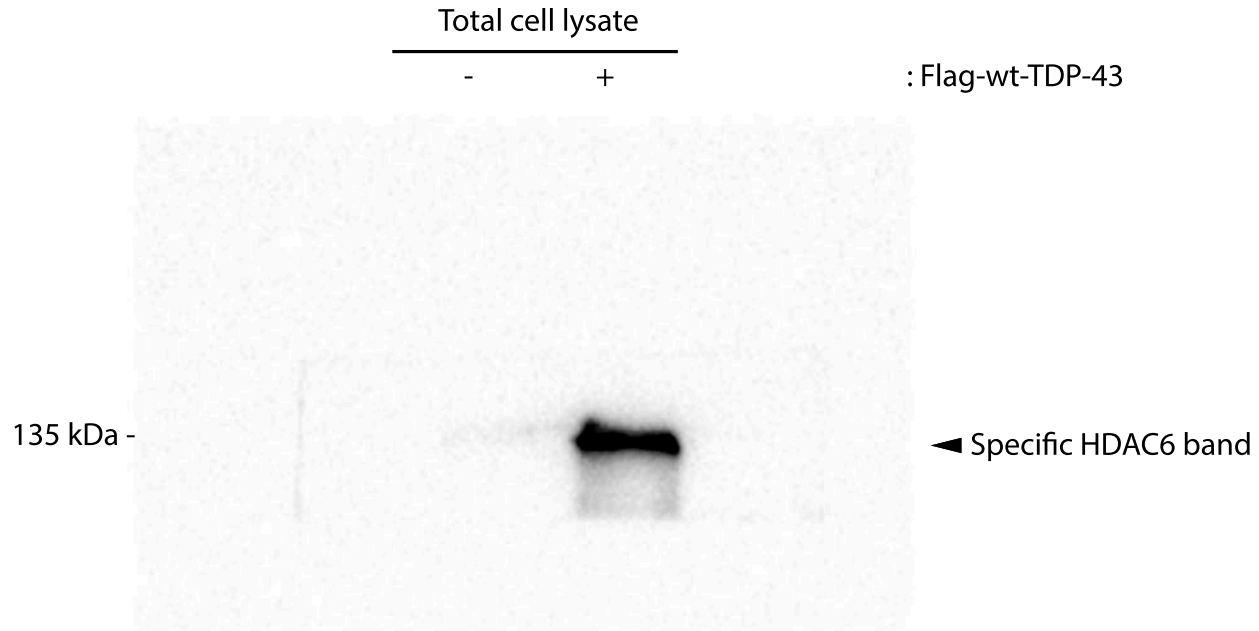

**Figure S2.** Replicate 3 TDP-43 complete gel Western-blot associated with Figure 3A  
Cabrera-Rodríguez, R., *et al.*

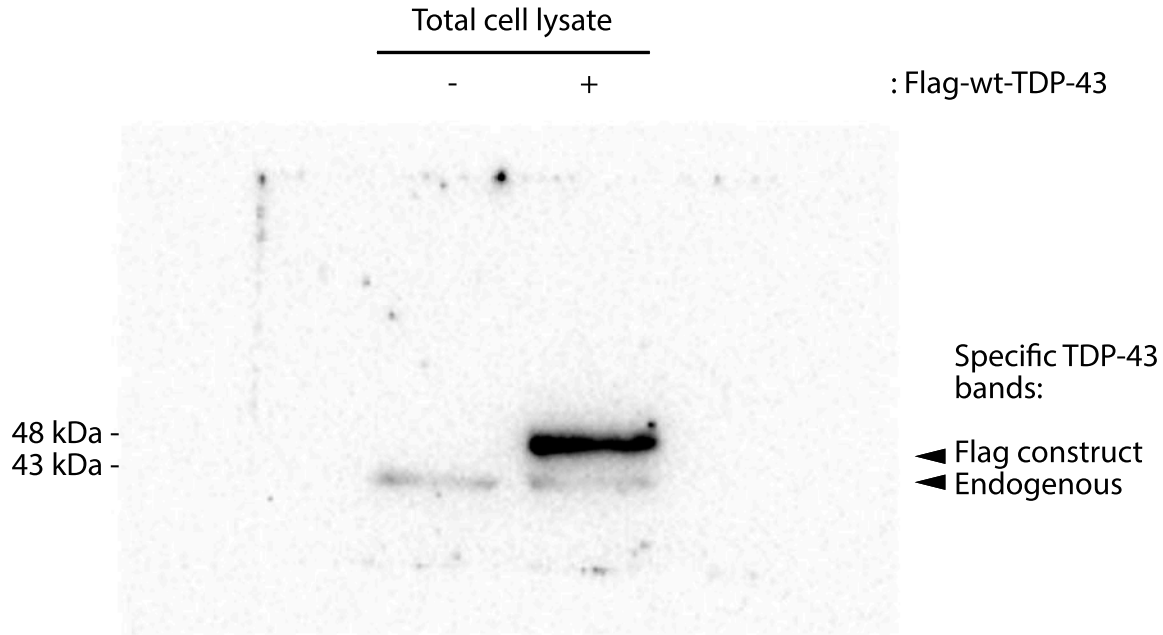

**Figure S2.** Replicate 3 Acetylated  $\alpha$ -tubulin complete gel Western-blot associated with Figure 3A  
Cabrera-Rodríguez, R., *et al.*

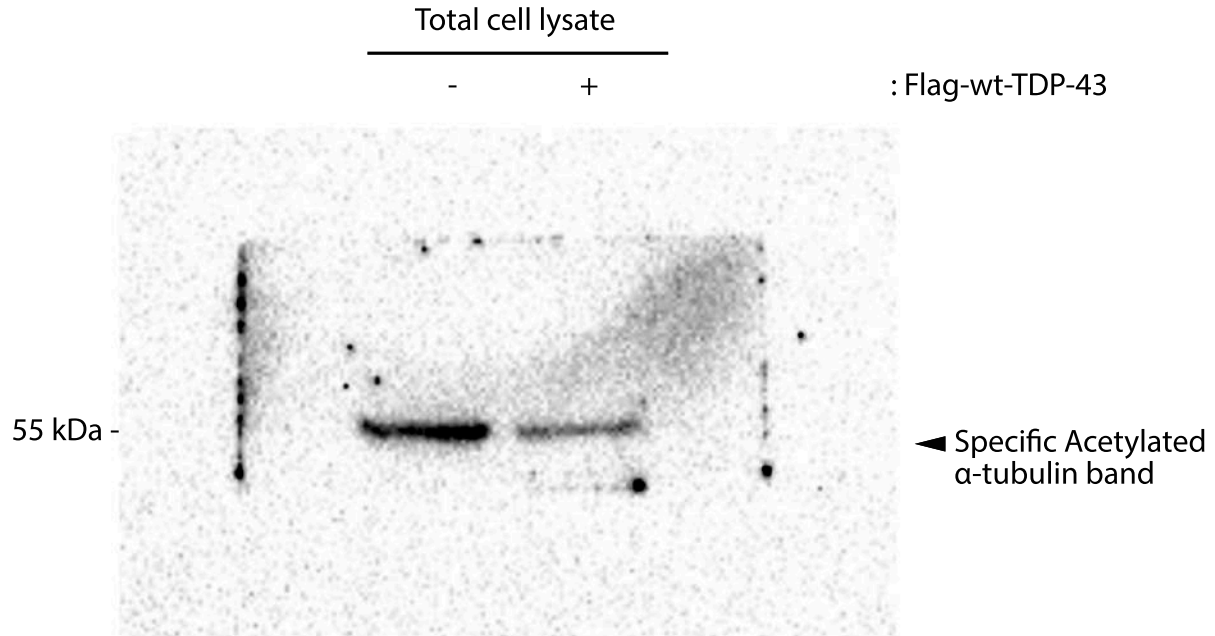

**Figure S2.** Replicate 3 Total  $\alpha$ -tubulin complete gel Western-blot associated with Figure 3A  
Cabrera-Rodríguez, R., *et al.*

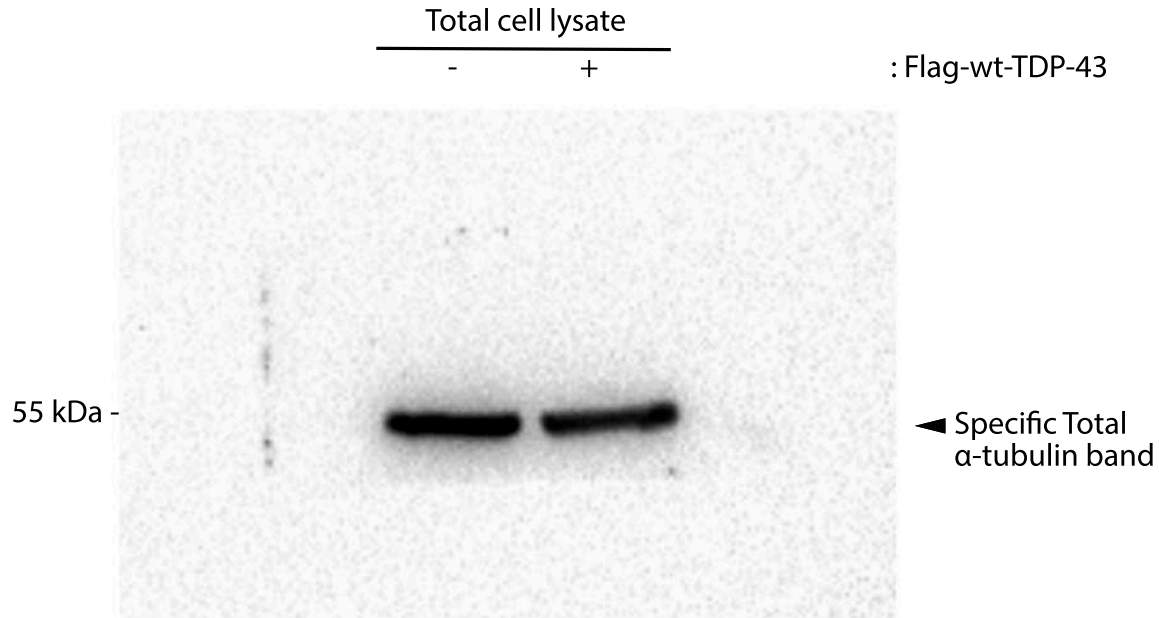

**Figure S2.** Replicate 3 HDAC6 complete gel Western-blot associated with Figure 3A  
Cabrera-Rodríguez, R., *et al.*

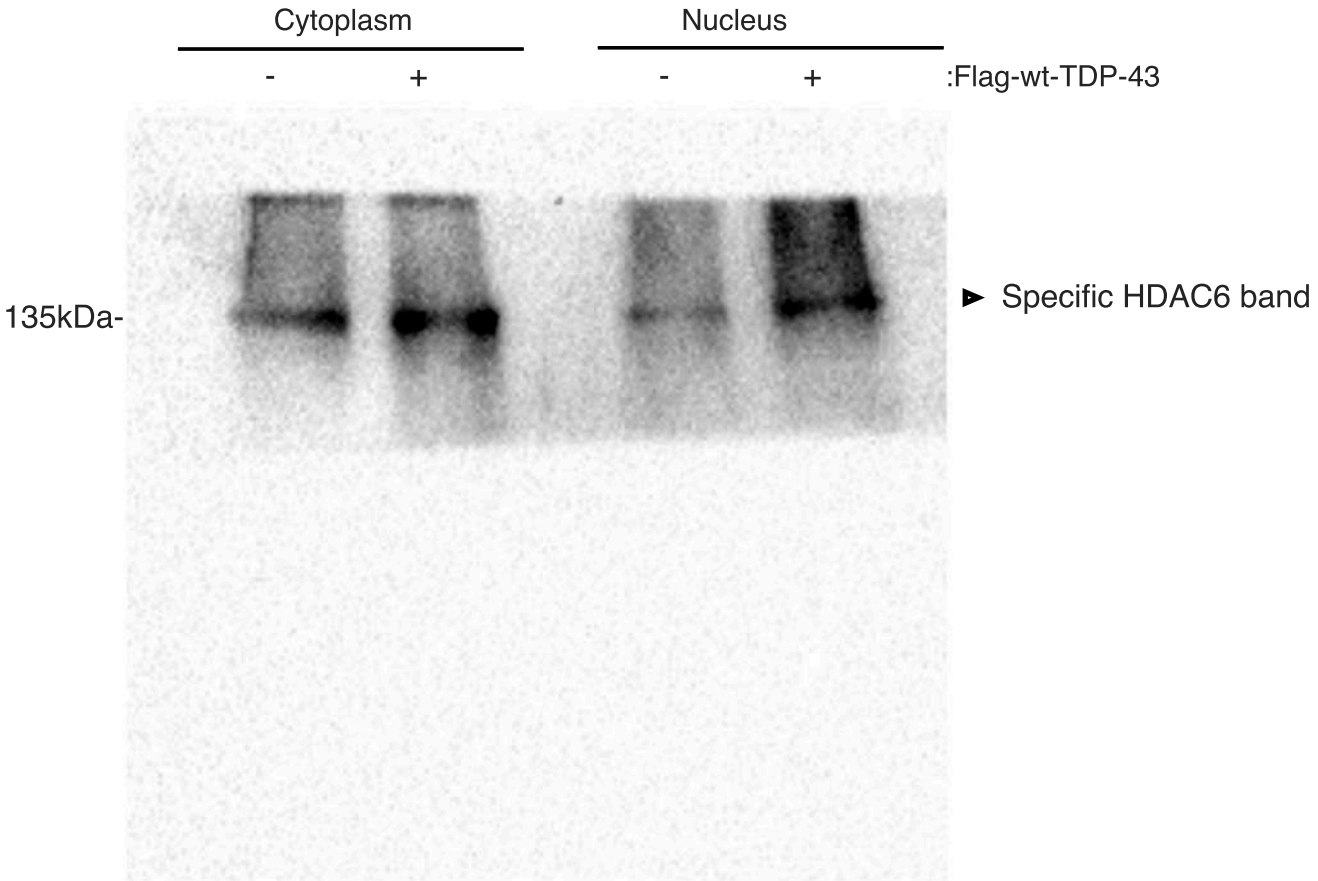



**Figure S2.** Replicate 3 TDP-43 complete gel Western-blot associated with Figure 3A  
Cabrera-Rodríguez, R., *et al.*

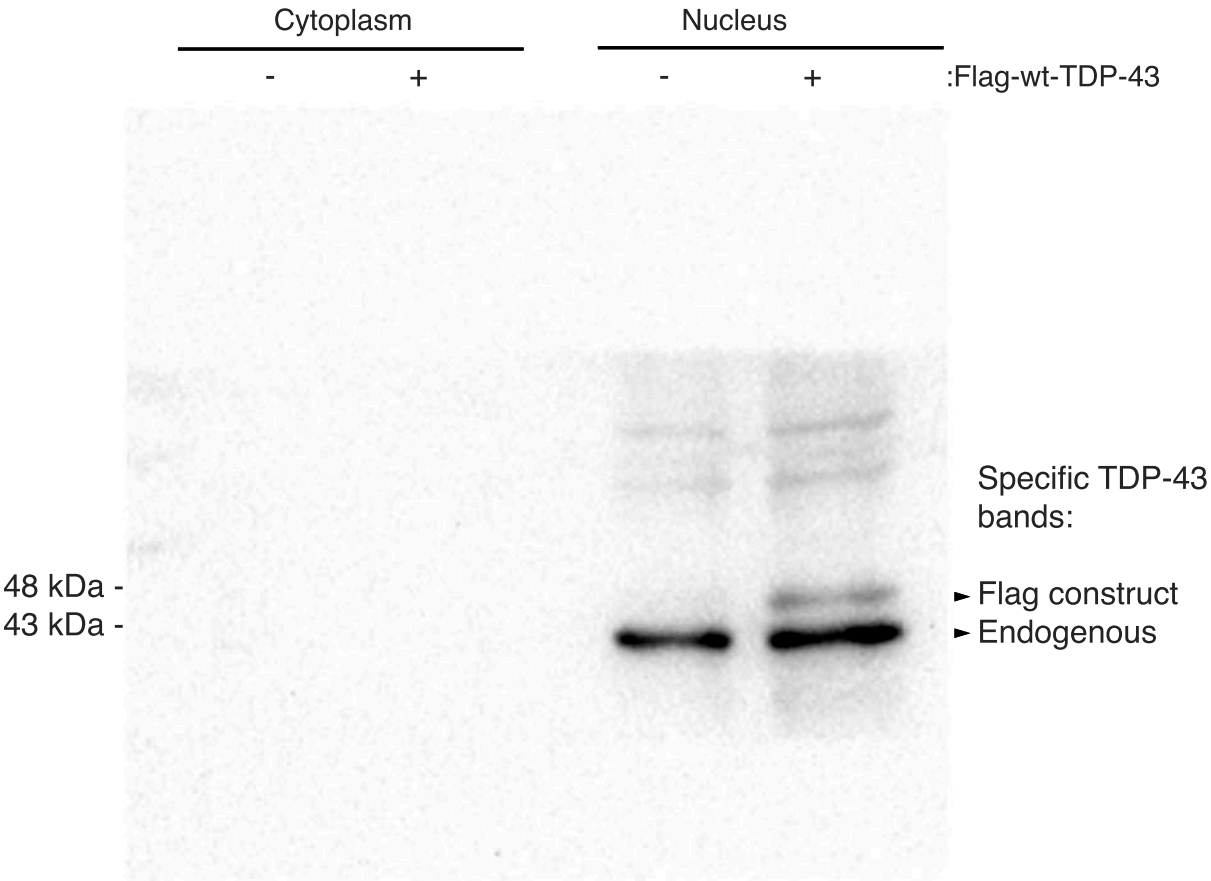

**Figure S2.** Replicate 3 Lamin B complete gel Western-blot associated with Figure 3A  
Cabrera-Rodríguez, R., *et al.*

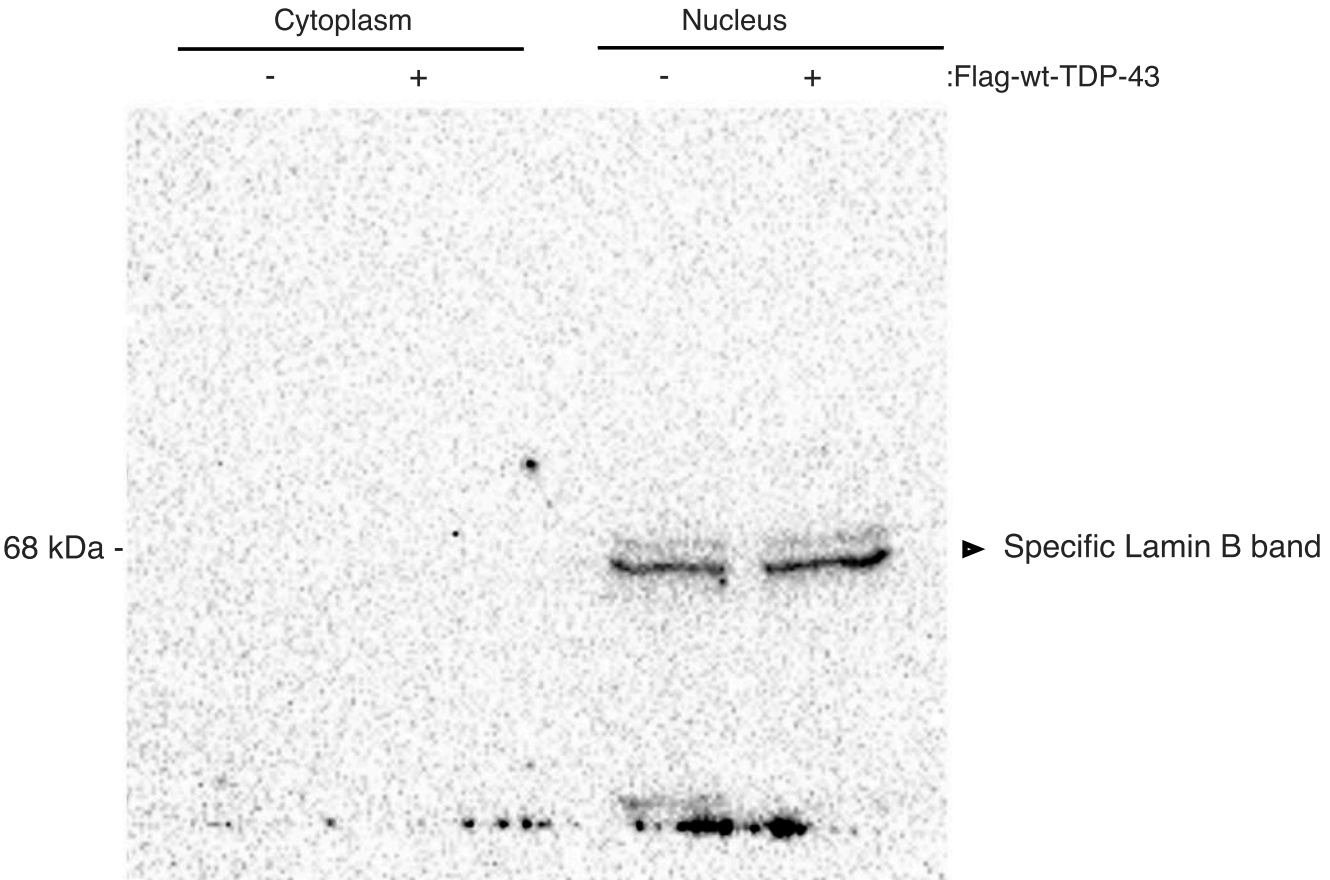

**Figure S2.** Replicate 3 Acetylated  $\alpha$ -tubulin complete gel Western-blot associated with Figure 3A  
Cabrera-Rodríguez, R., *et al.*

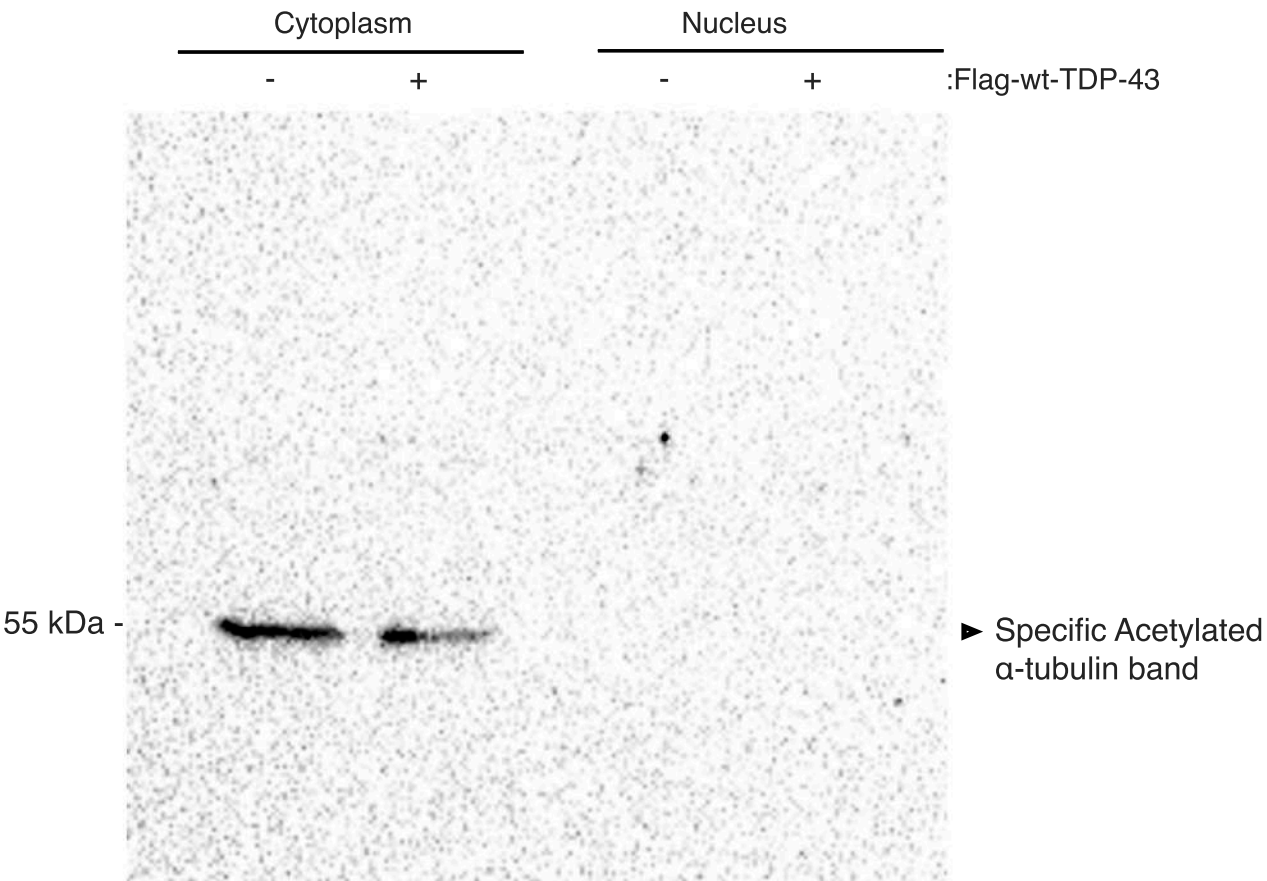

**Figure S2.** Replicate 3 Total  $\alpha$ -tubulin complete gel Western-blot associated with Figure 3A  
Cabrera-Rodríguez, R., *et al.*

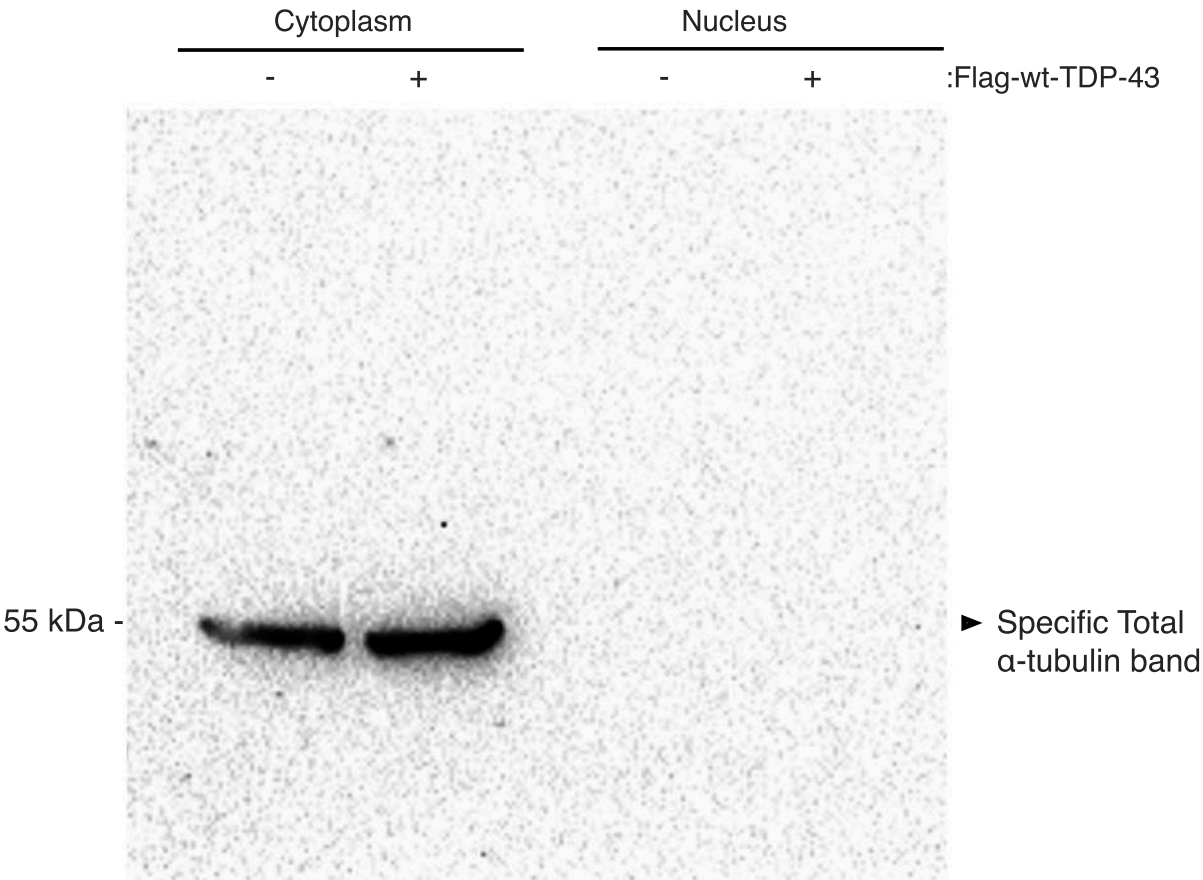

Replicate 1 as figure format

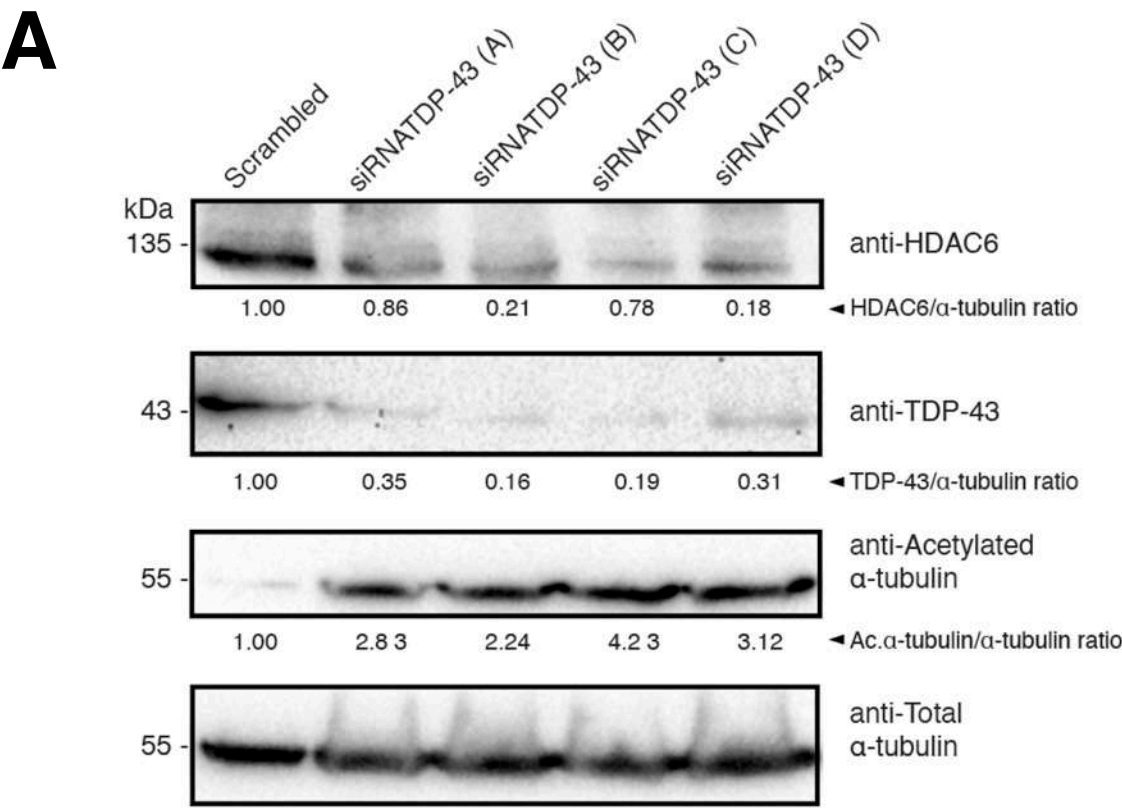

Replicate 2 as figure format

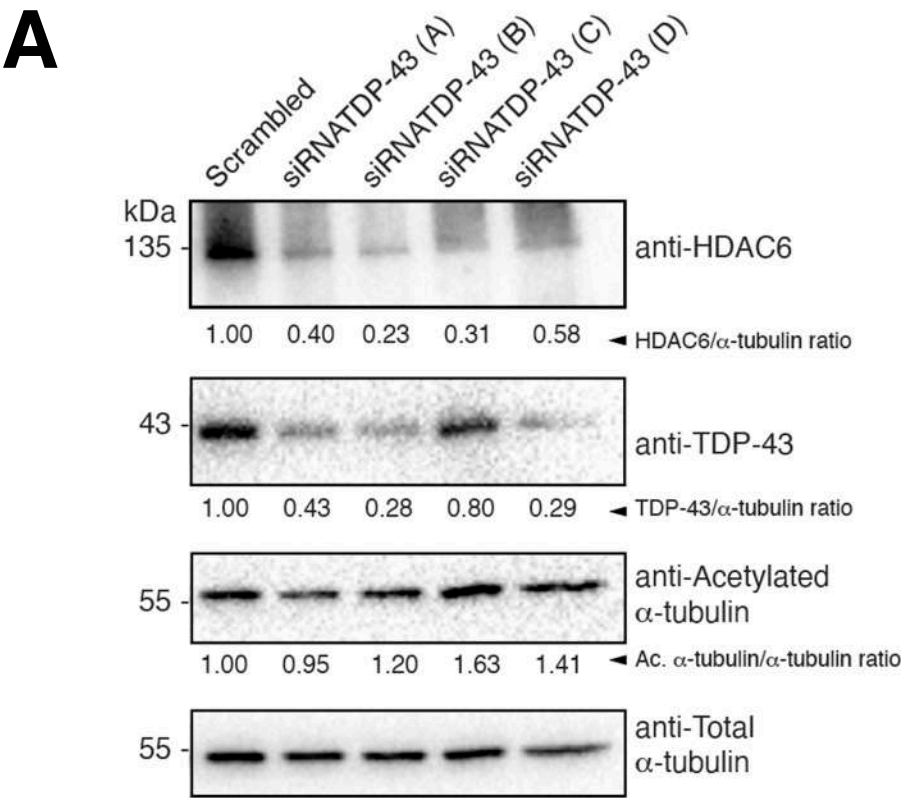

Replicate 3 as figure format

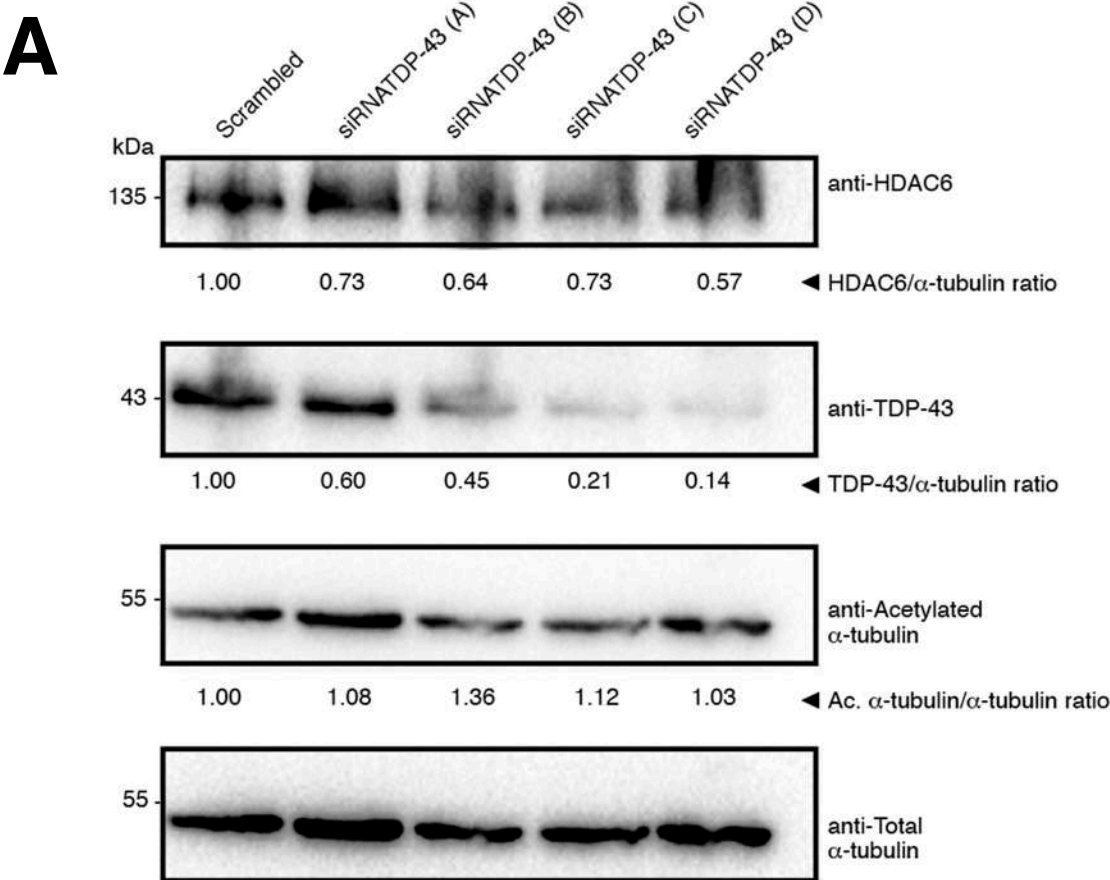

**Figure S3.** Replicate 1 HDAC6 complete gel Western-blot associated with Figure 4A  
Cabrera-Rodríguez, R., *et al.*

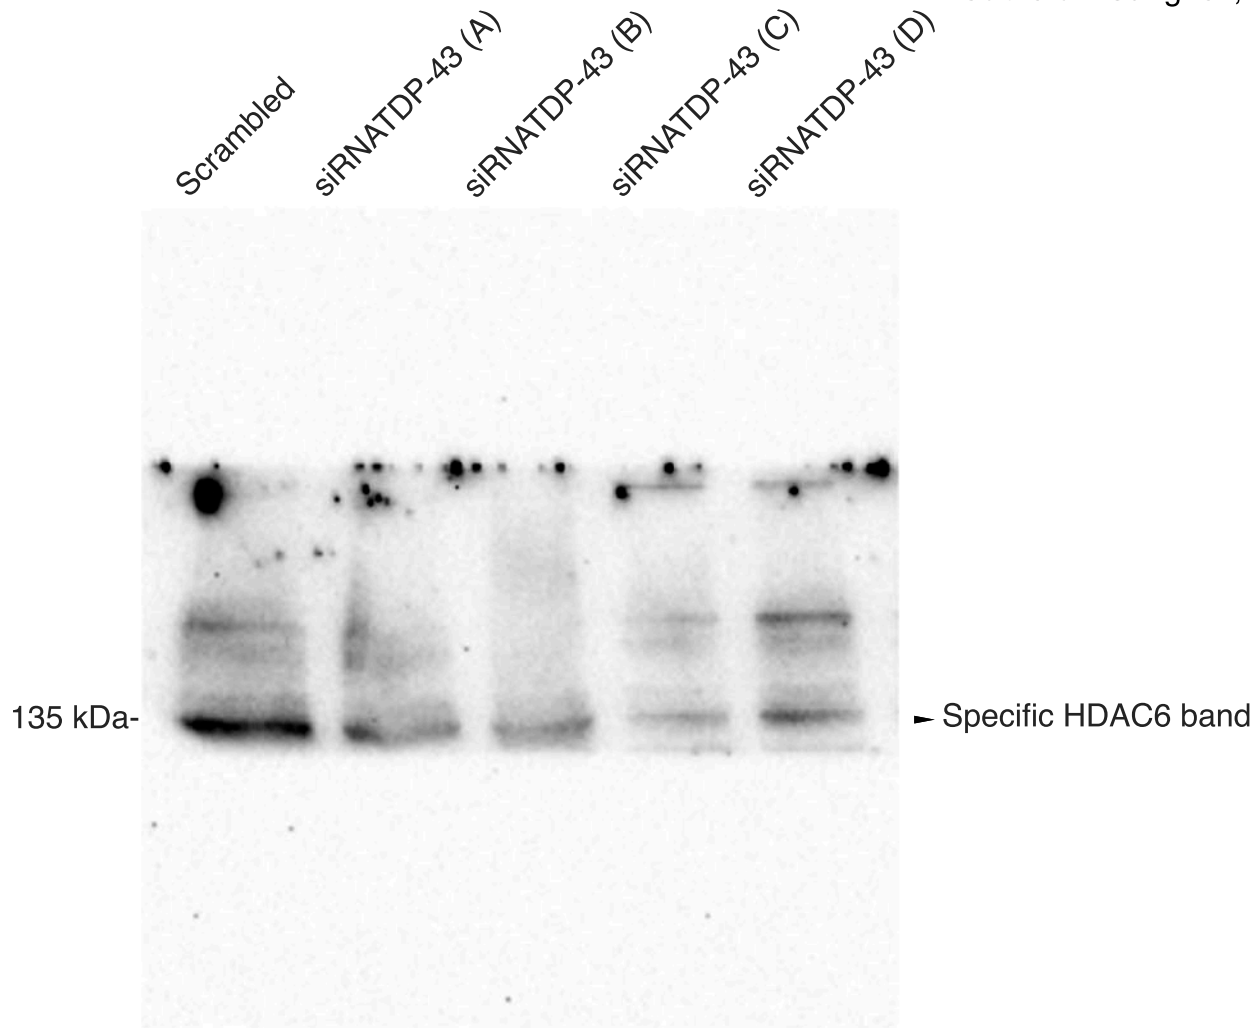

**Figure S3.** Replicate 1 TDP-43 complete gel Western-blot associated with Figure 4A  
Cabrera-Rodríguez, R., *et al.*

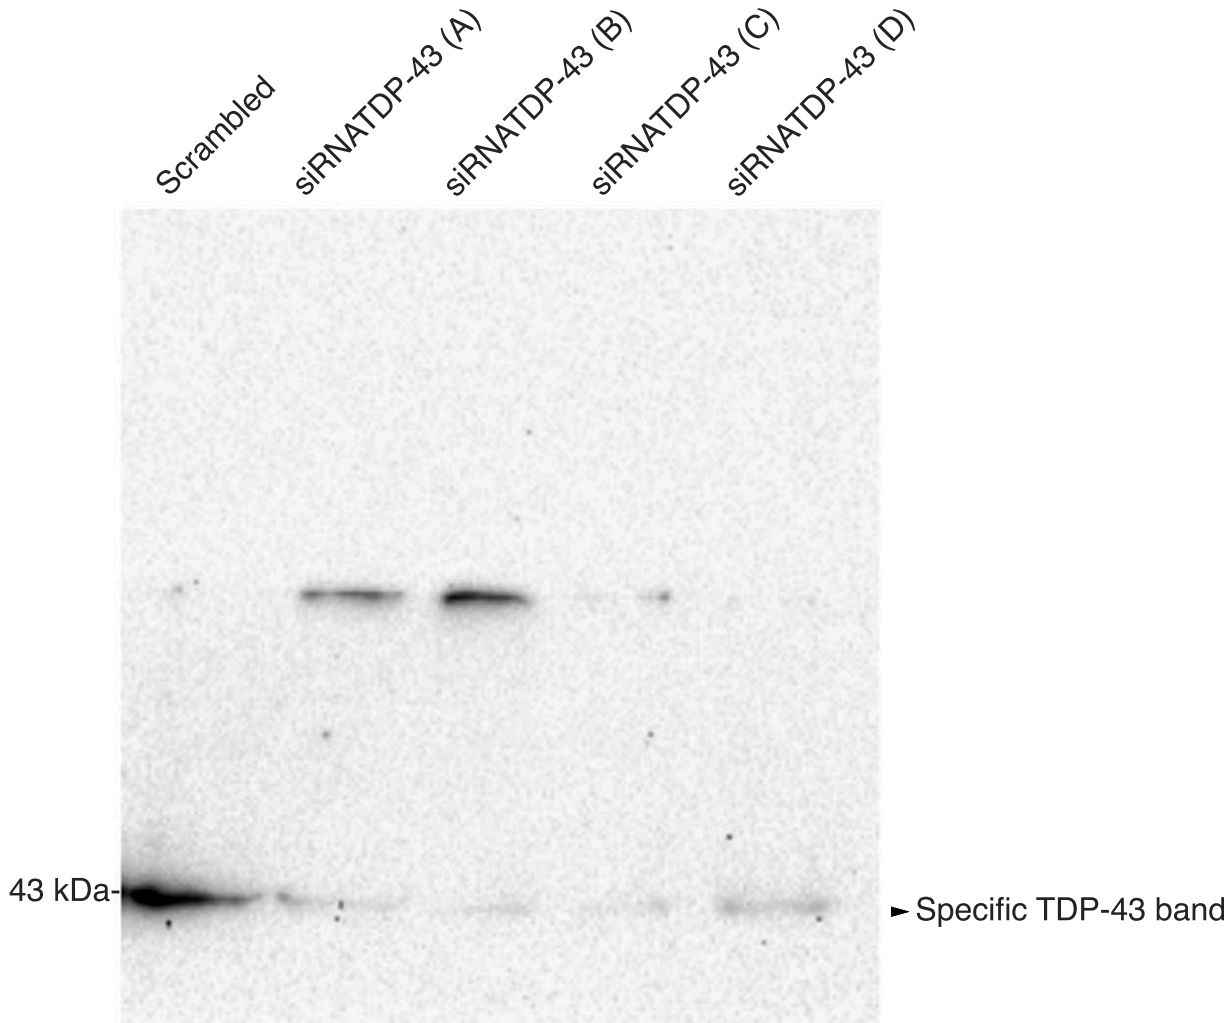

**Figure S3.** Replicate 1 Acetylated  $\alpha$ -tubulin complete gel Western-blot associated with Figure 4A  
Cabrera-Rodríguez, R., *et al.*

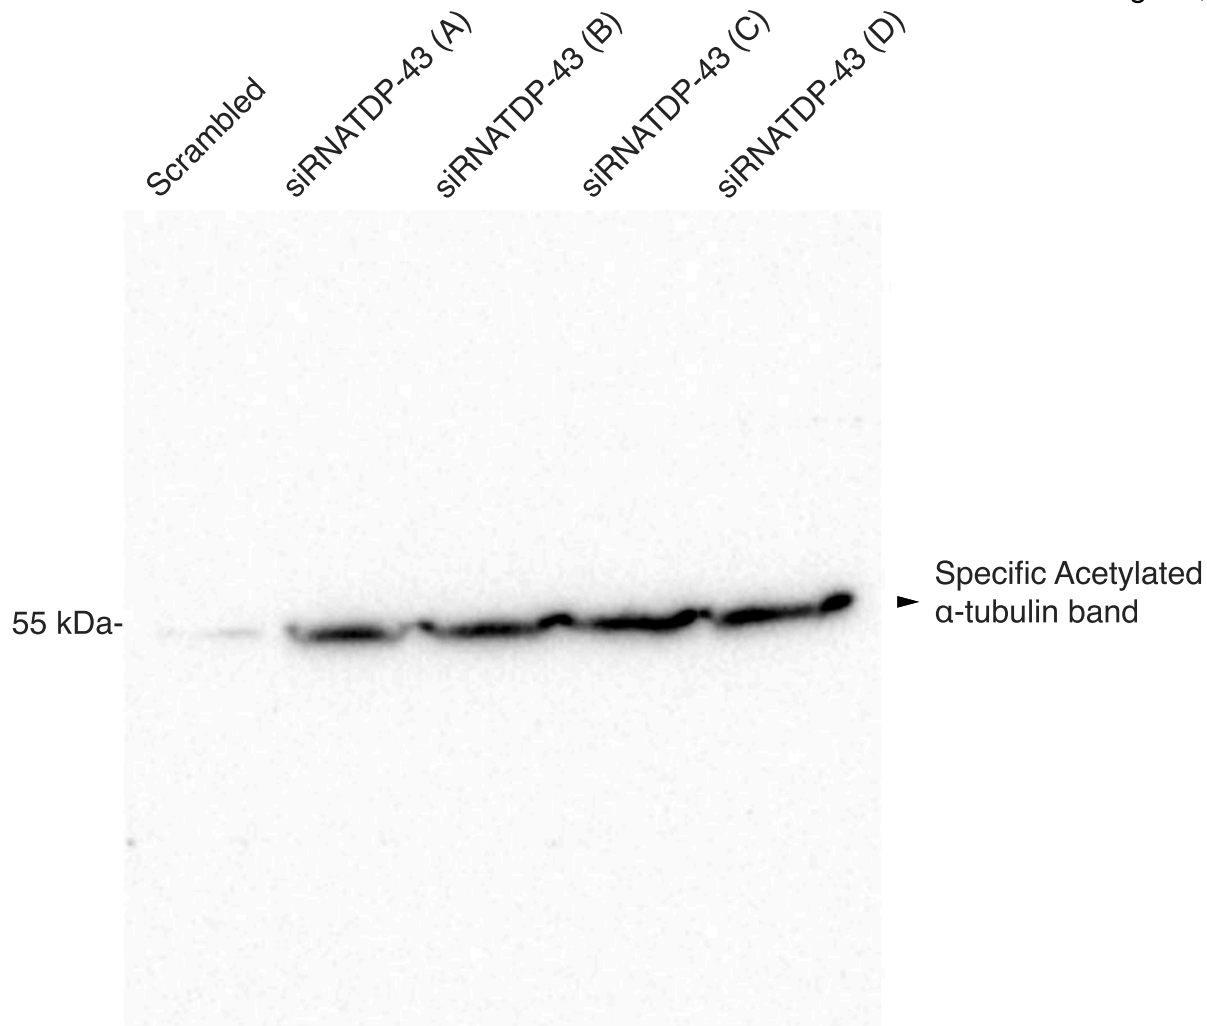



**Figure S3.** Replicate 1 Total  $\alpha$ -tubulin complete gel Western-blot associated with Figure 4A  
Cabrera-Rodríguez, R., *et al.*

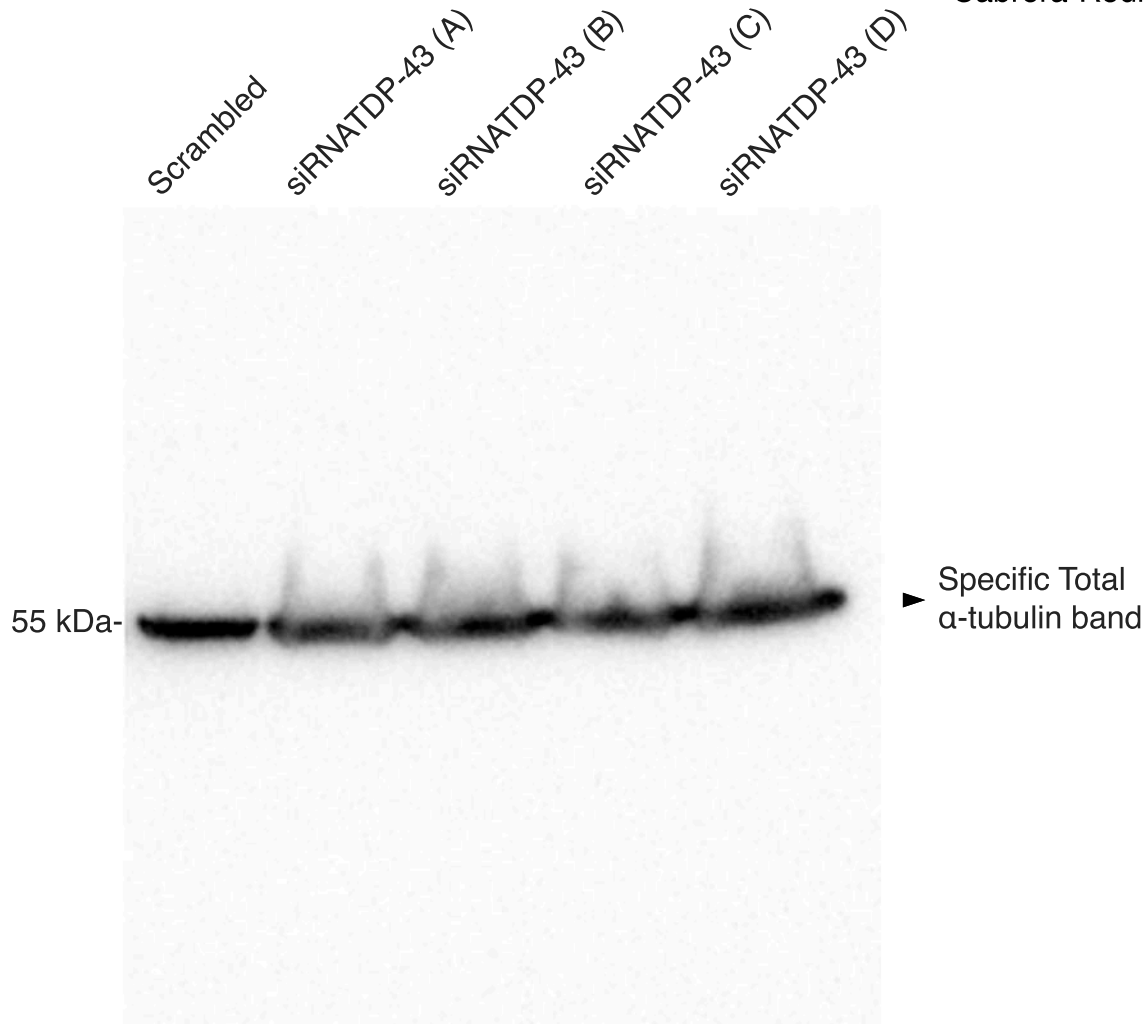

**Figure S3.** Replicate 2 HDAC6 complete gel Western-blot associated with Figure 4A  
Cabrera-Rodríguez, R., *et al.*

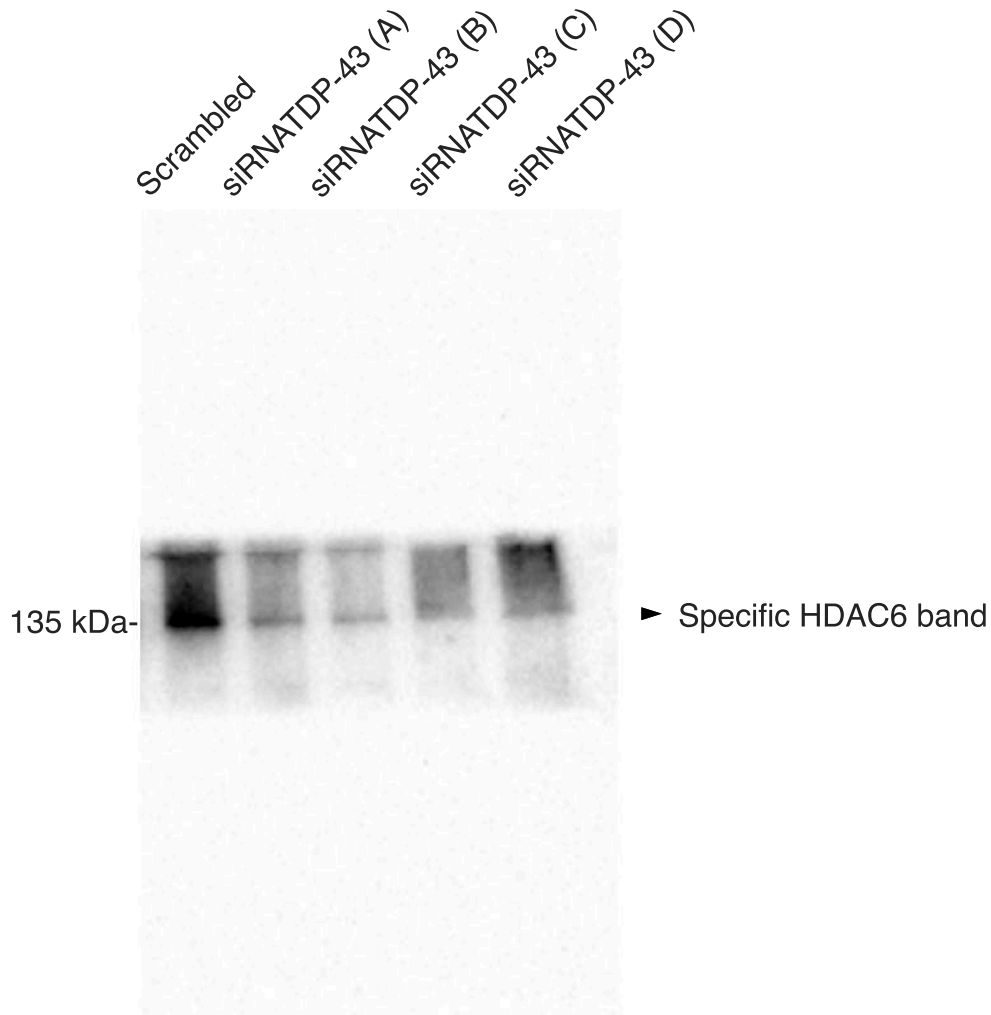

**Figure S3.** Replicate 2 TDP-43 complete gel Western-blot associated with Figure 4A  
Cabrera-Rodríguez, R., *et al.*

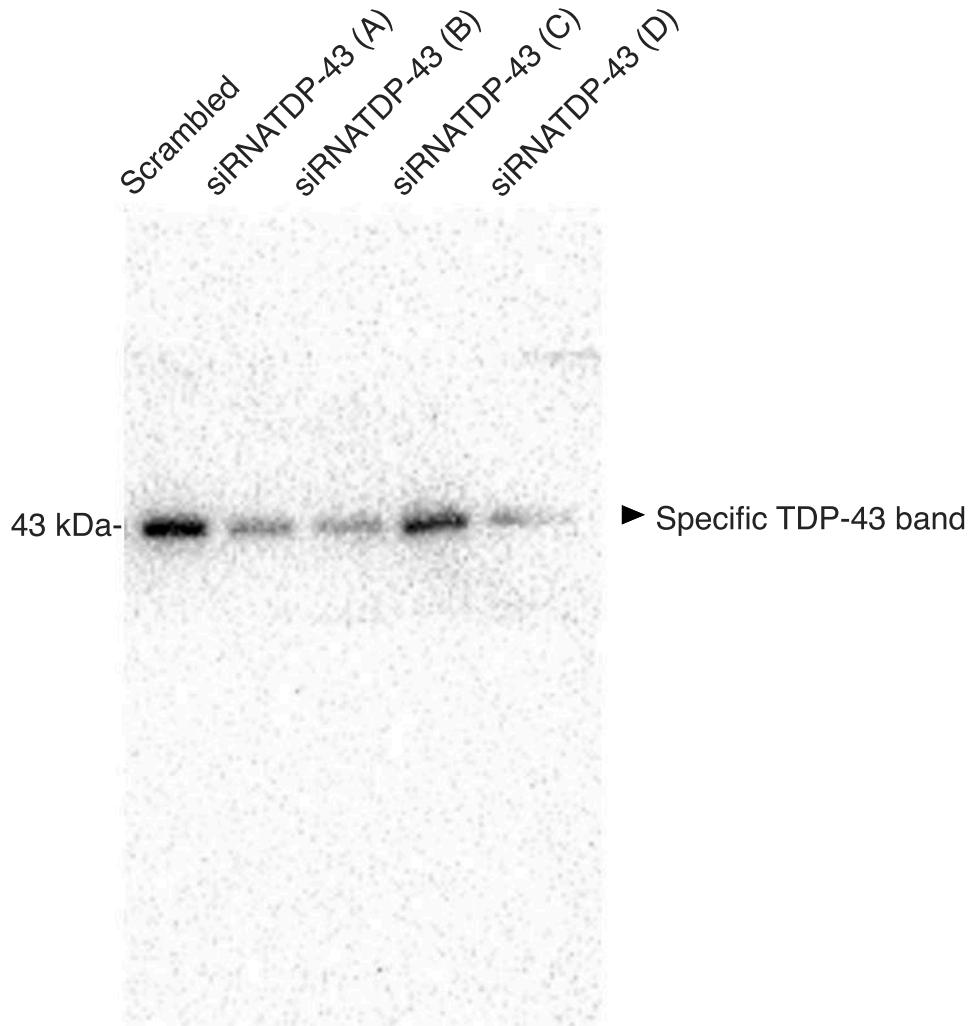

**Figure S3.** Replicate 2 Acetylated  $\alpha$ -tubulin complete gel

Western-blot associated with Figure 4A  
Cabrera-Rodríguez, R., *et al.*

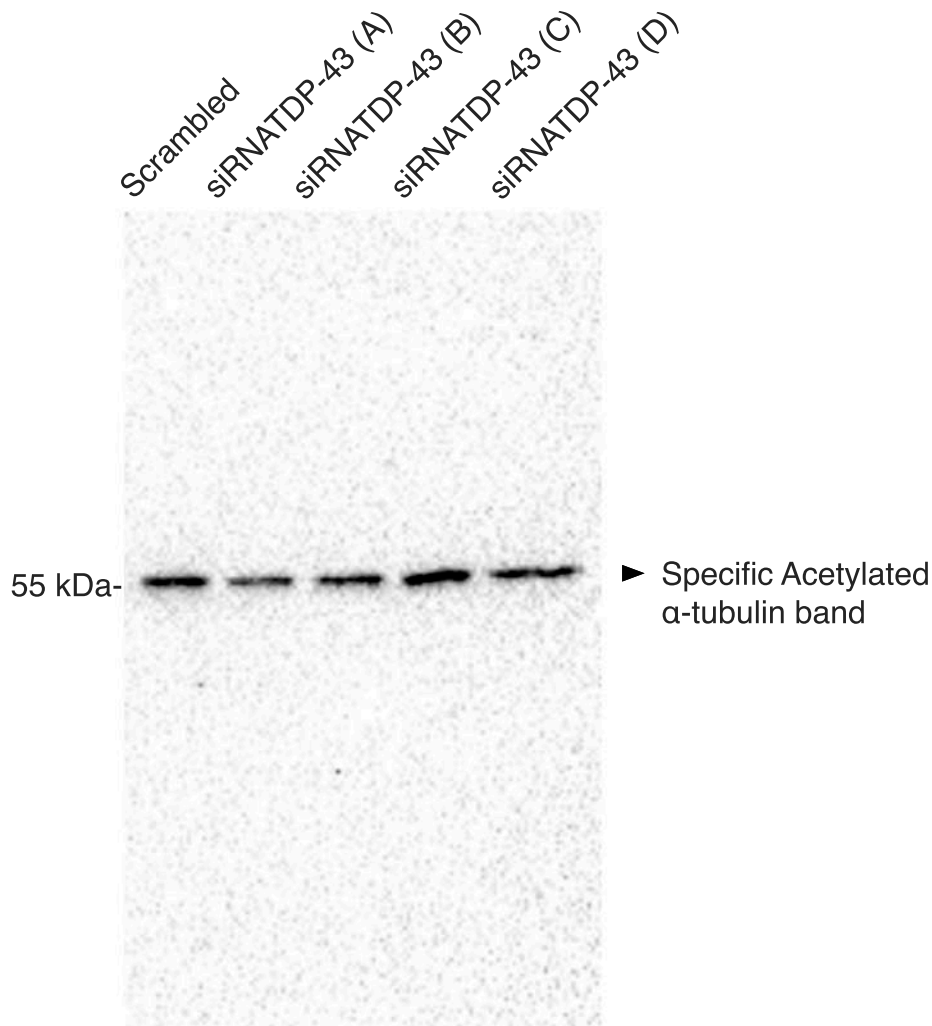

**Figure S3.** Replicate 2 Total  $\alpha$ -tubulin complete gel Western-blot associated with Figure 4A  
Cabrera-Rodríguez, R., *et al.*

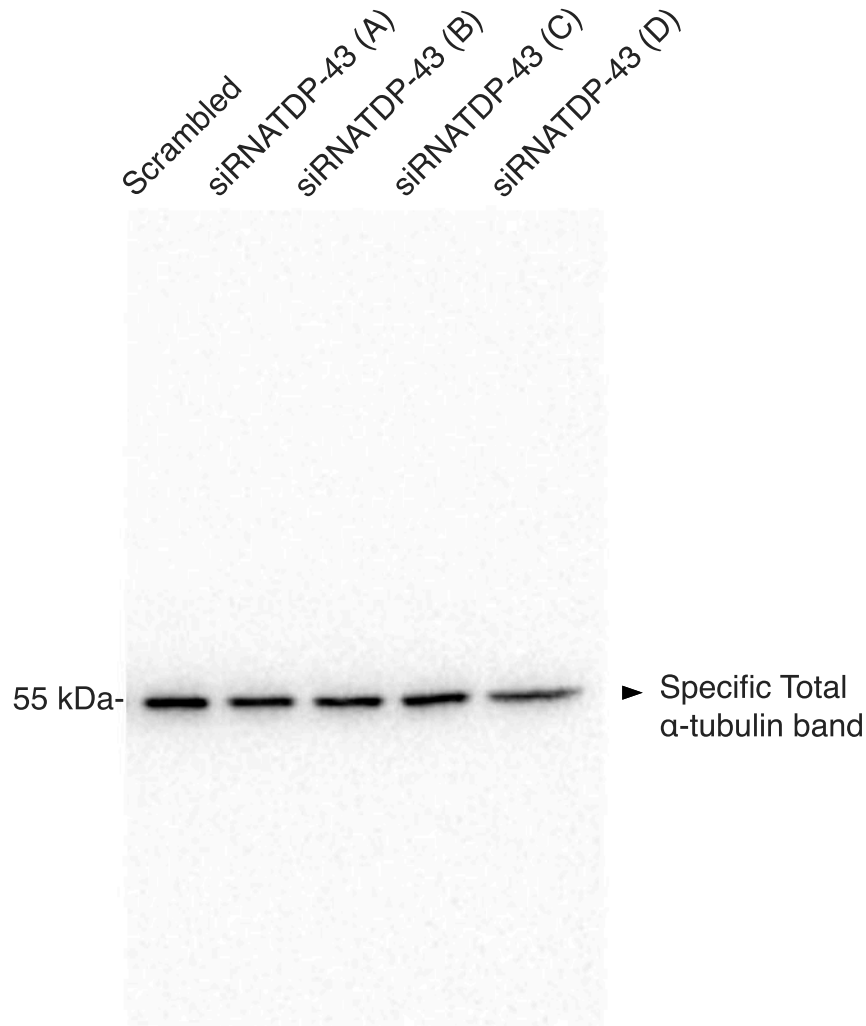

**Figure S3.** Replicate 3 HDAC6 complete gel Western-blot associated with Figure 4A  
Cabrera-Rodríguez, R., *et al.*

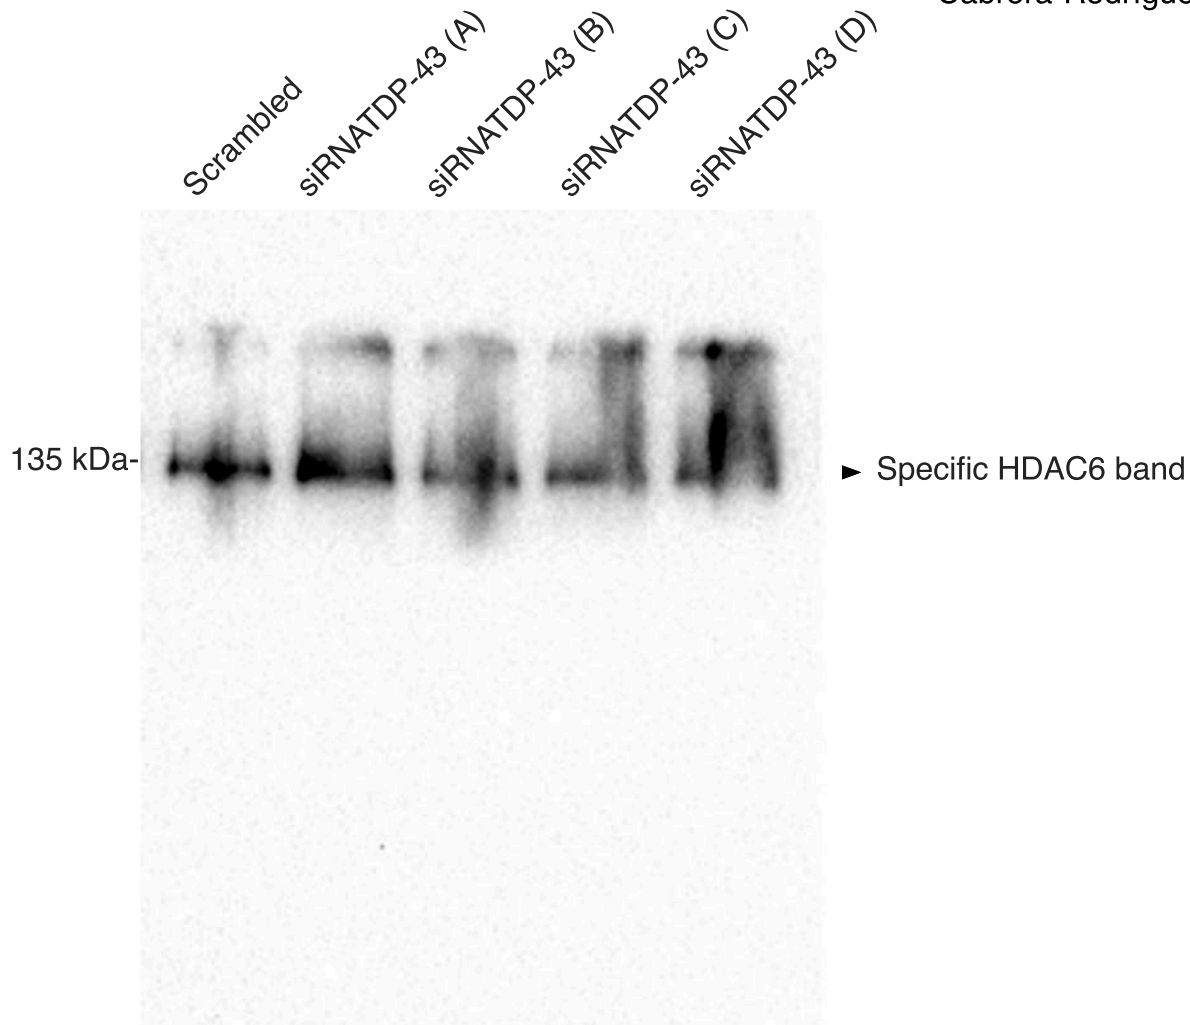

**Figure S3.** Replicate 3 TDP-43 complete gel Western-blot associated with Figure 4A  
Cabrera-Rodríguez, R., *et al.*

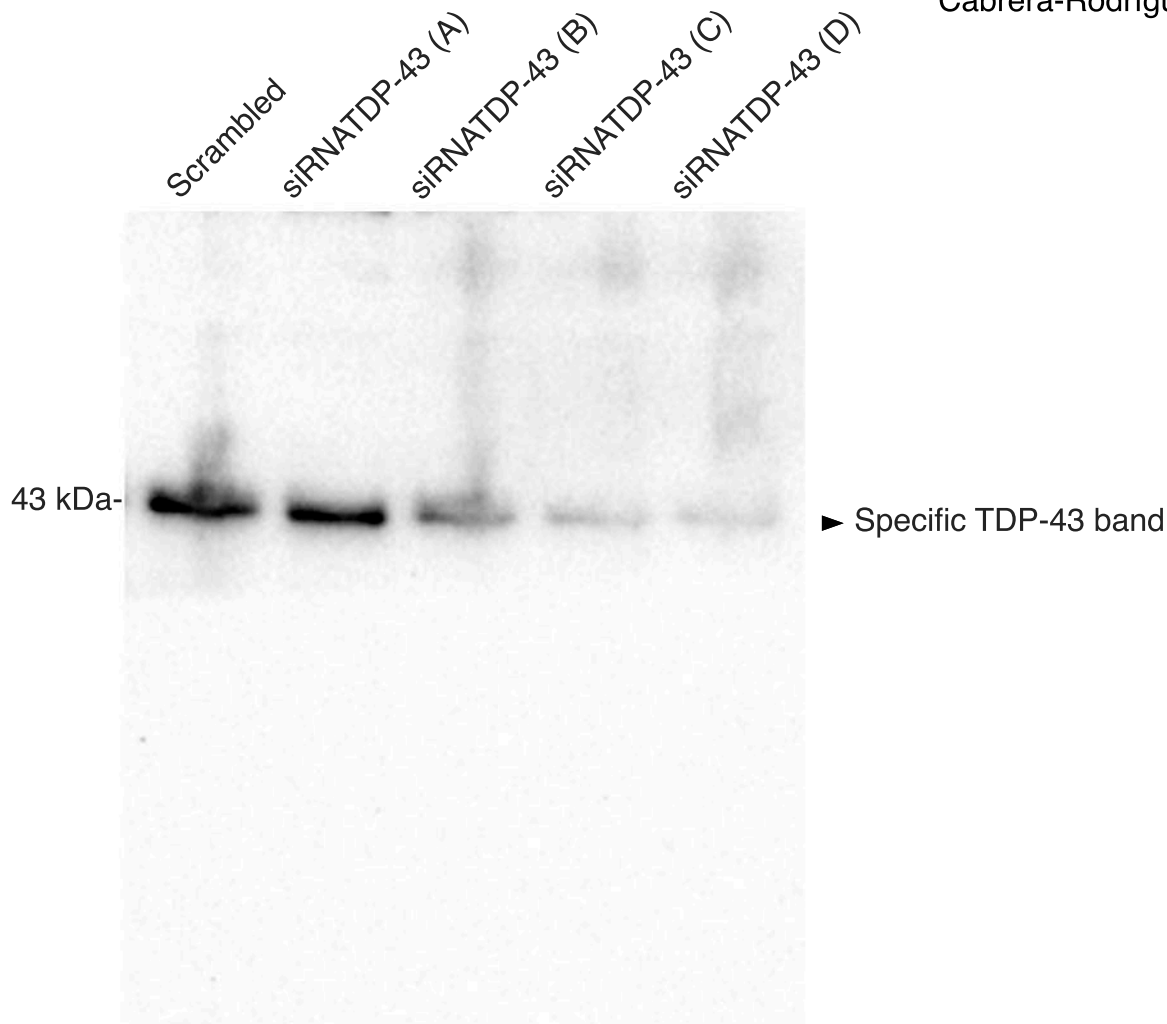

**Figure S3.** Replicate 3 Acetylated  $\alpha$ -tubulin complete gel Western-blot associated with Figure 4A  
Cabrera-Rodríguez, R., *et al.*

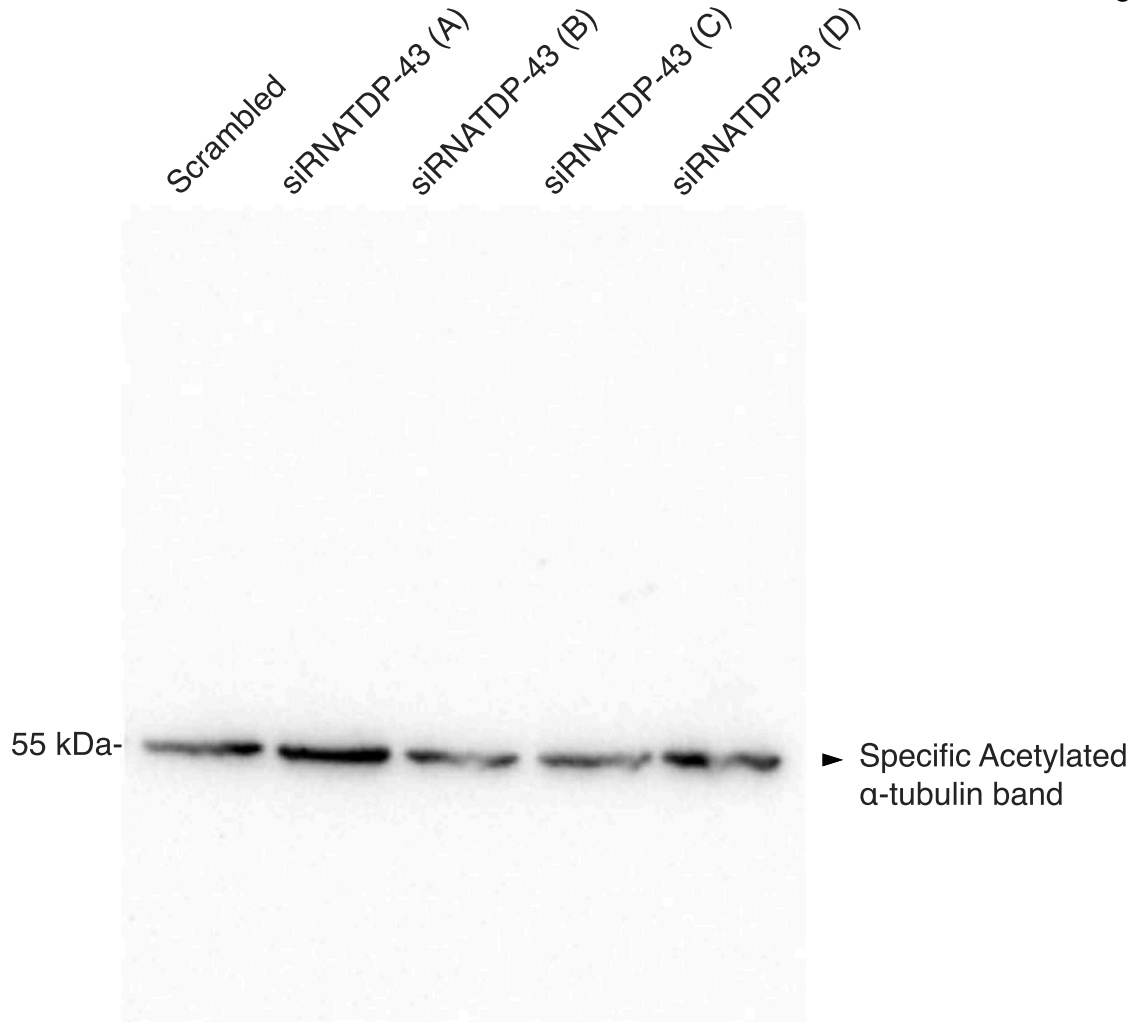



**Figure S3.** Replicate 3 Total  $\alpha$ -tubulin complete gel Western-blot associated with Figure 4A  
Cabrera-Rodríguez, R., *et al.*

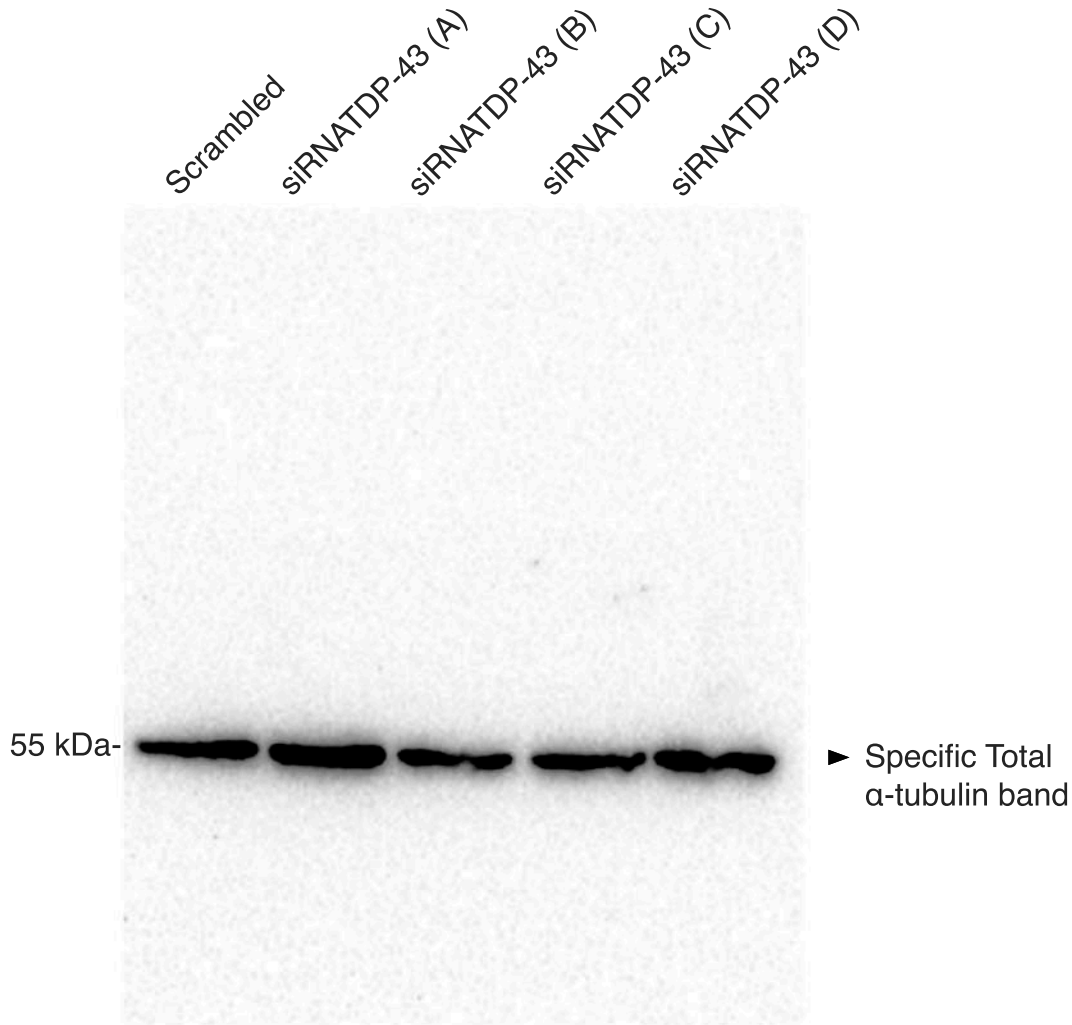

Replicate 1 as figure format

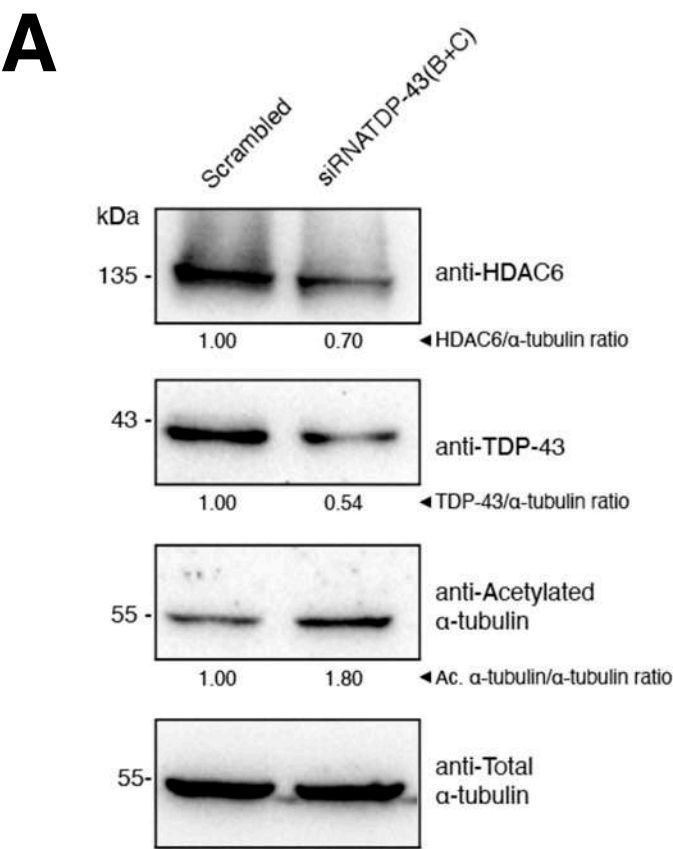

Replicate 2 as figure format

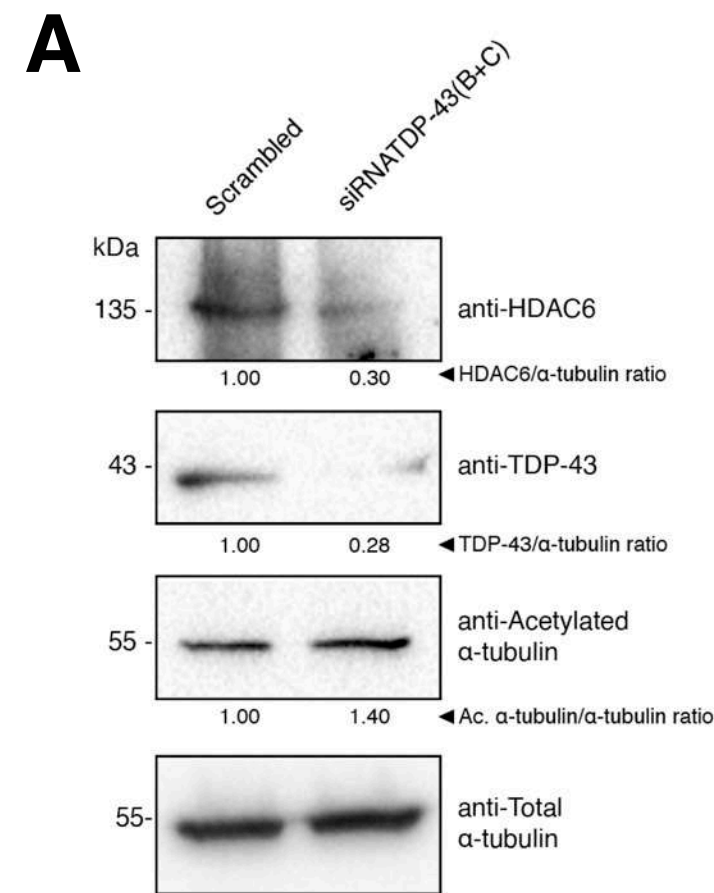

Replicate 3 as figure format

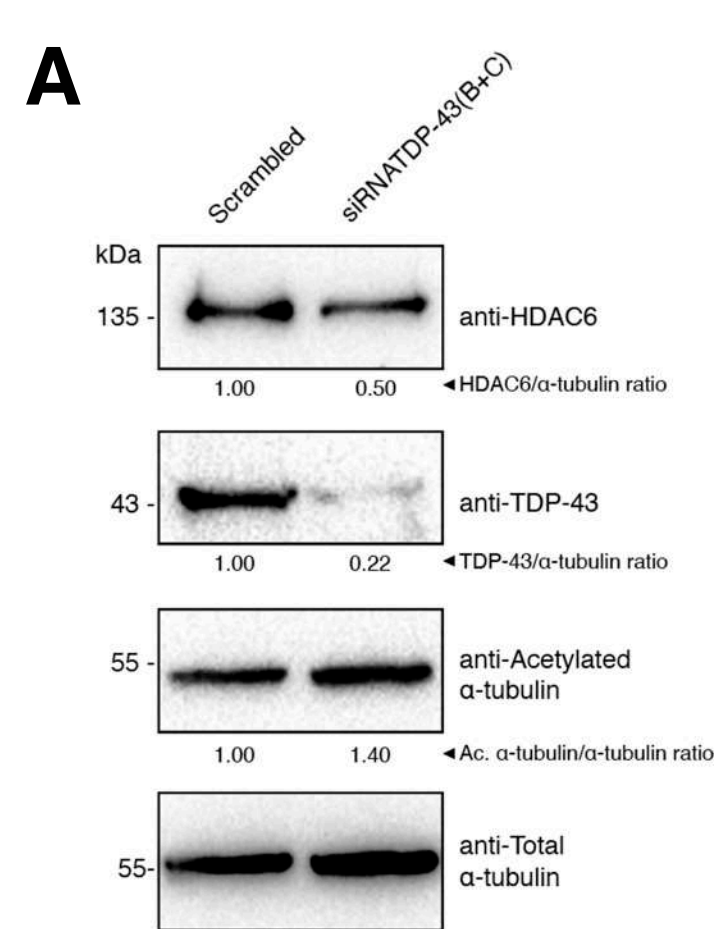

**Figure S4.** Replicate 1 HDAC6 complete gel Western-blot associated with Figure 6A  
Cabrera-Rodríguez, R., *et al.*

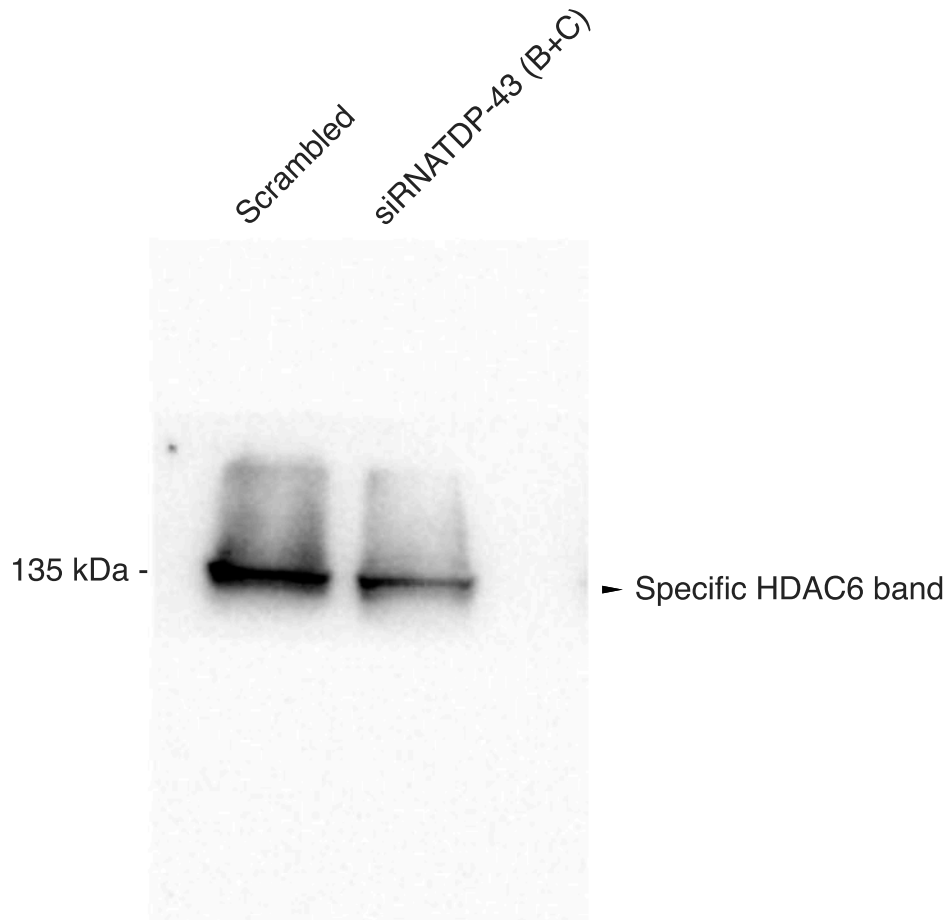

**Figure S4.** Replicate 1 TDP-43 complete gel Western-blot associated with Figure 6A  
Cabrera-Rodríguez, R., *et al.*

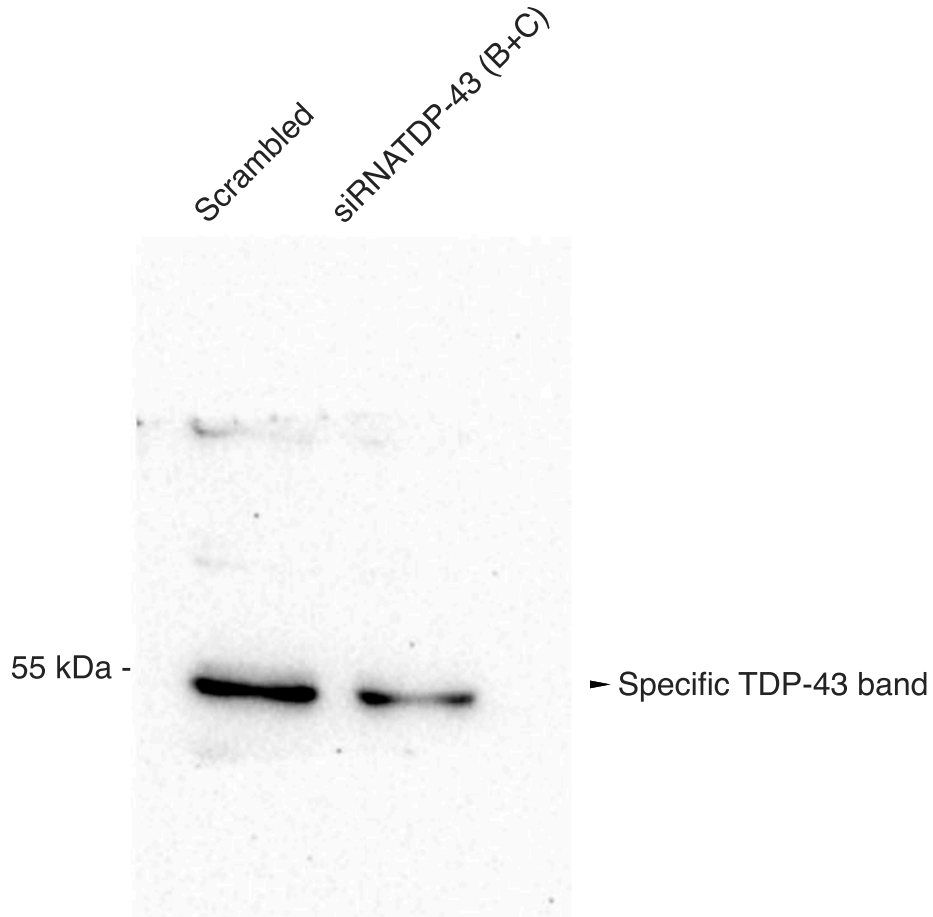

**Figure S4.** Replicate 1 Acetylated  $\alpha$ -tubulin complete gel Western-blot associated with Figure 6A  
Cabrera-Rodríguez, R., *et al.*

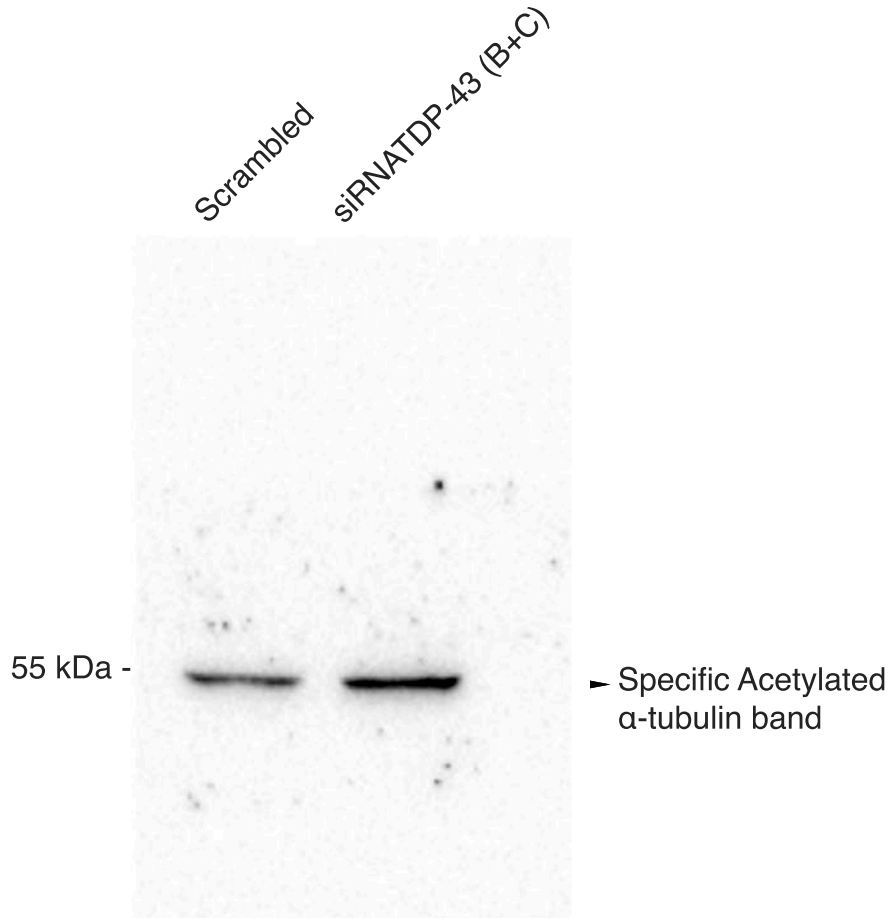

**Figure S4.** Replicate 1 Total  $\alpha$ -tubulin complete gel Western-blot associated with Figure 6A  
Cabrera-Rodríguez, R., *et al.*

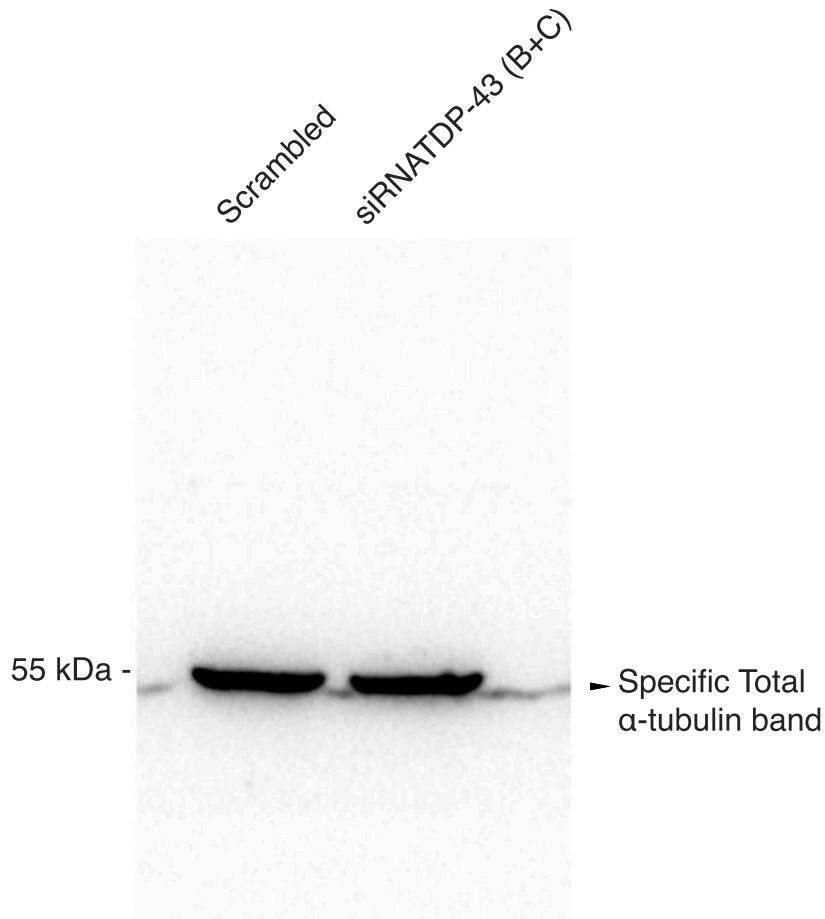

**Figure S4.** Replicate 2 HDAC6 complete gel Western-blot associated with Figure 6A  
Cabrera-Rodríguez, R., *et al.*

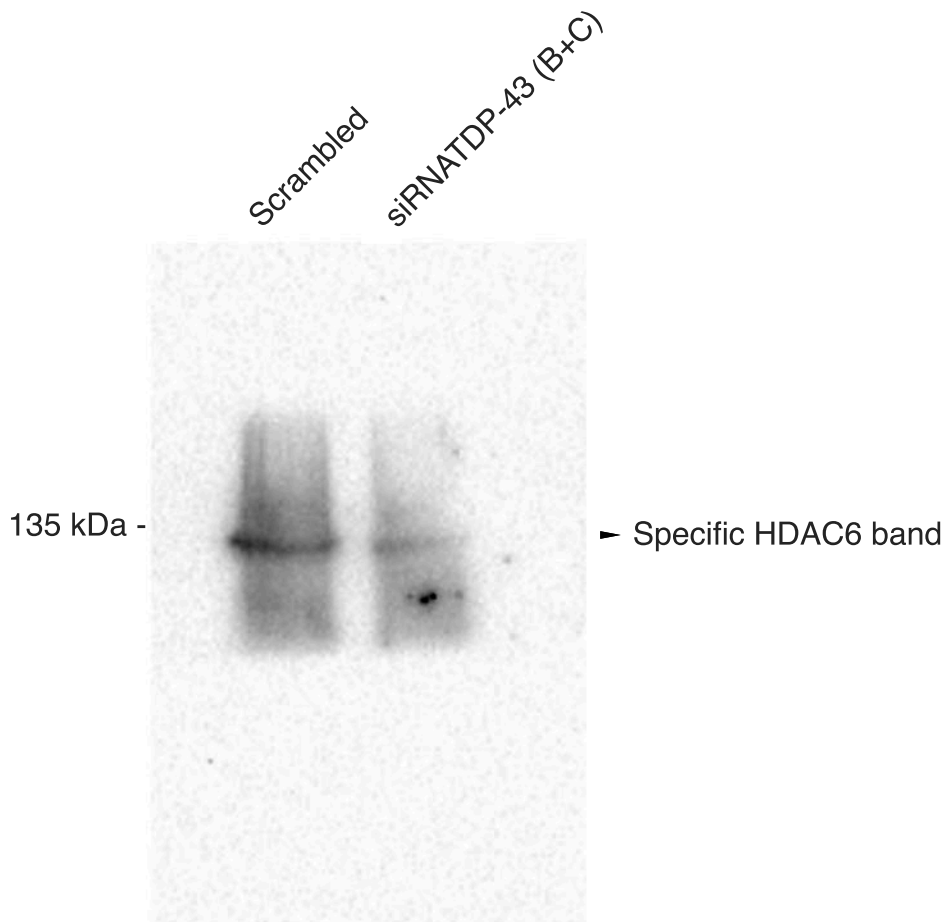

**Figure S4.** Replicate 2 TDP-43 complete gel Western-blot associated with Figure 6A  
Cabrera-Rodríguez, R., *et al.*

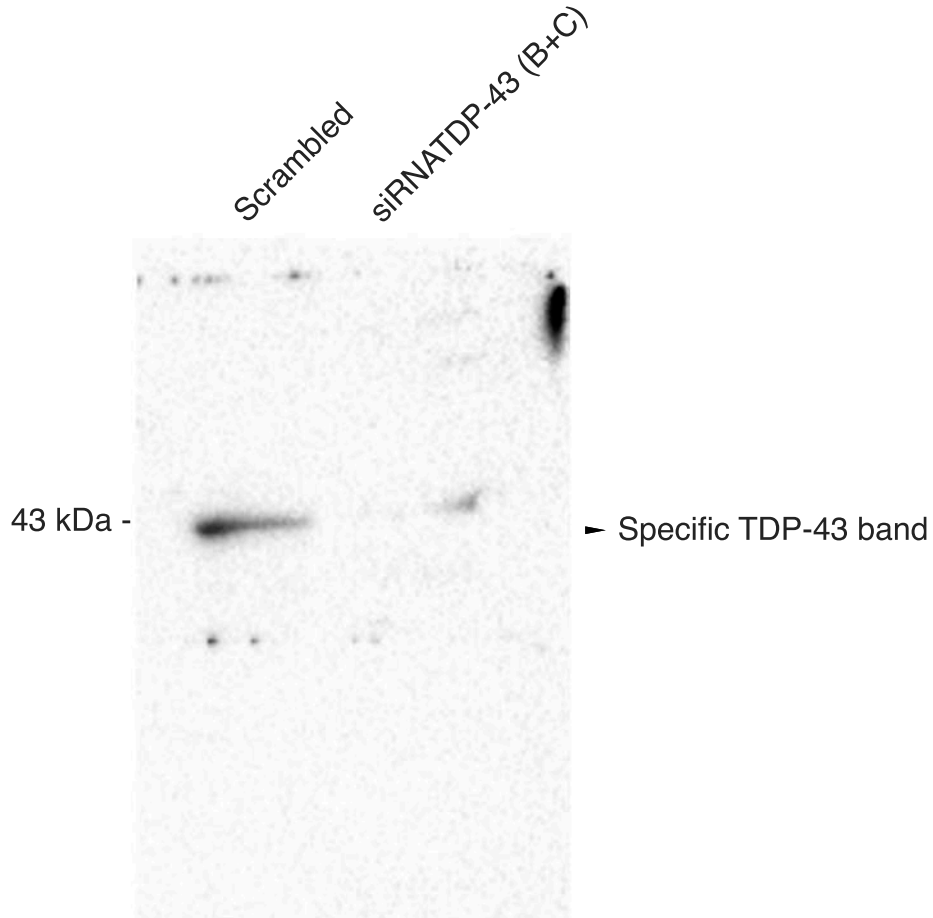



**Figure S4.** Replicate 2 Acetylated  $\alpha$ -tubulin complete gel Western-blot associated with Figure 6A  
Cabrera-Rodríguez, R., *et al.*

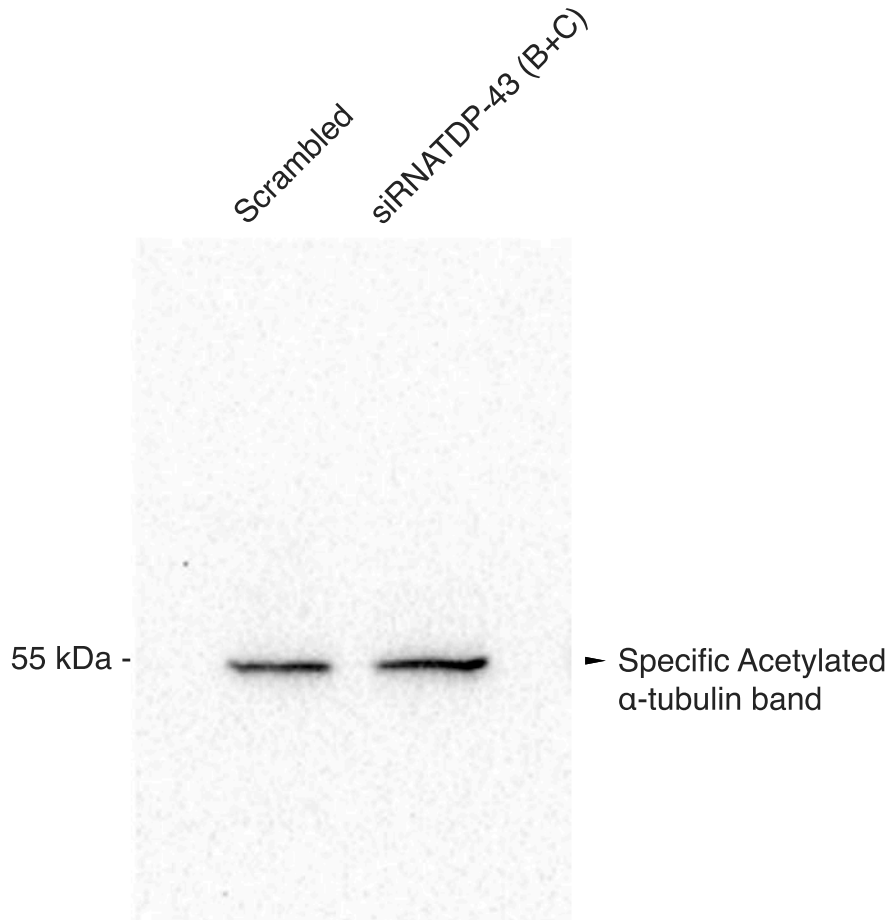

**Figure S4.** Replicate 2 Total  $\alpha$ -tubulin complete gel Western-blot associated with Figure 6A  
Cabrera-Rodríguez, R., *et al.*

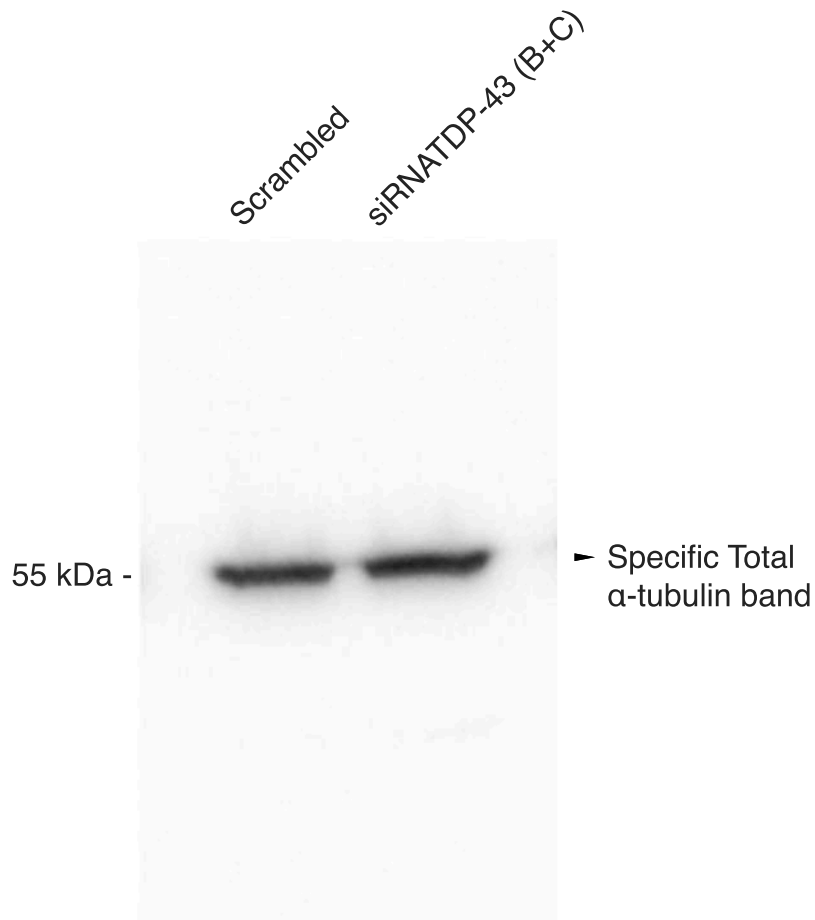

**Figure S4.** Replicate 3 HDAC6 complete gel Western-blot associated with Figure 6A  
Cabrera-Rodríguez, R., *et al.*

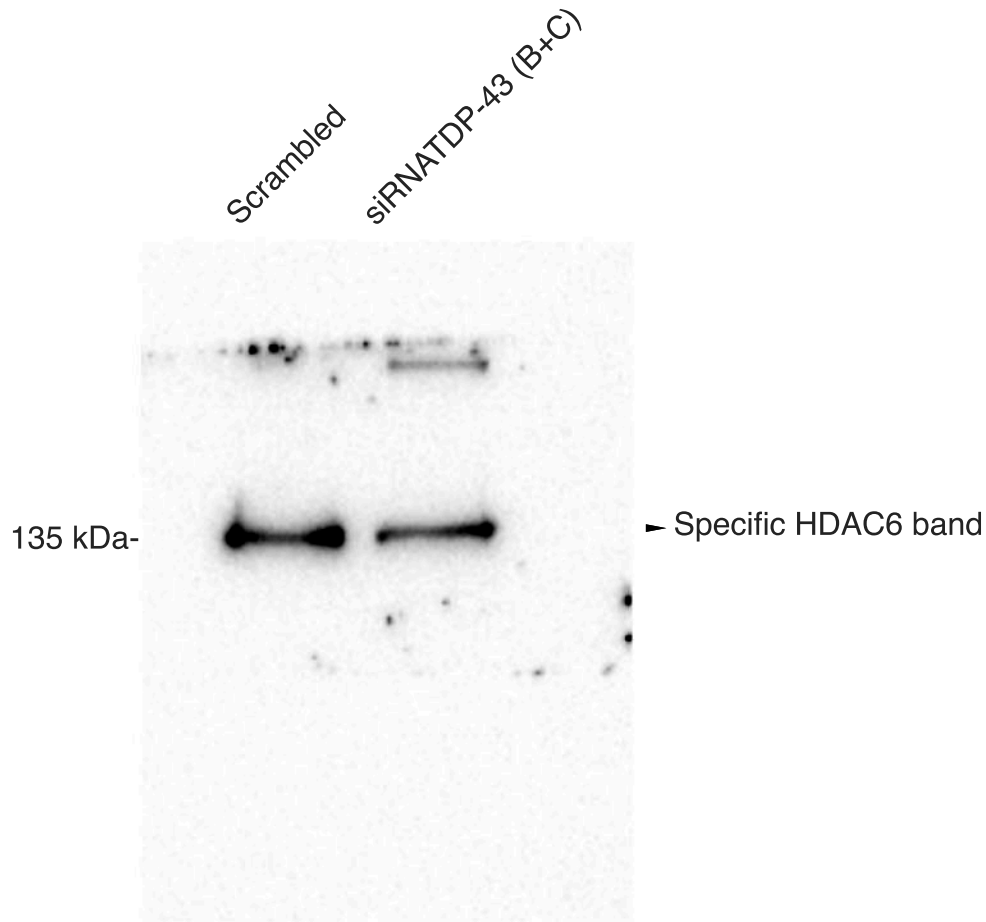

**Figure S4.** Replicate 3 TDP-43 complete gel Western-blot associated with Figure 6A  
Cabrera-Rodríguez, R., *et al.*

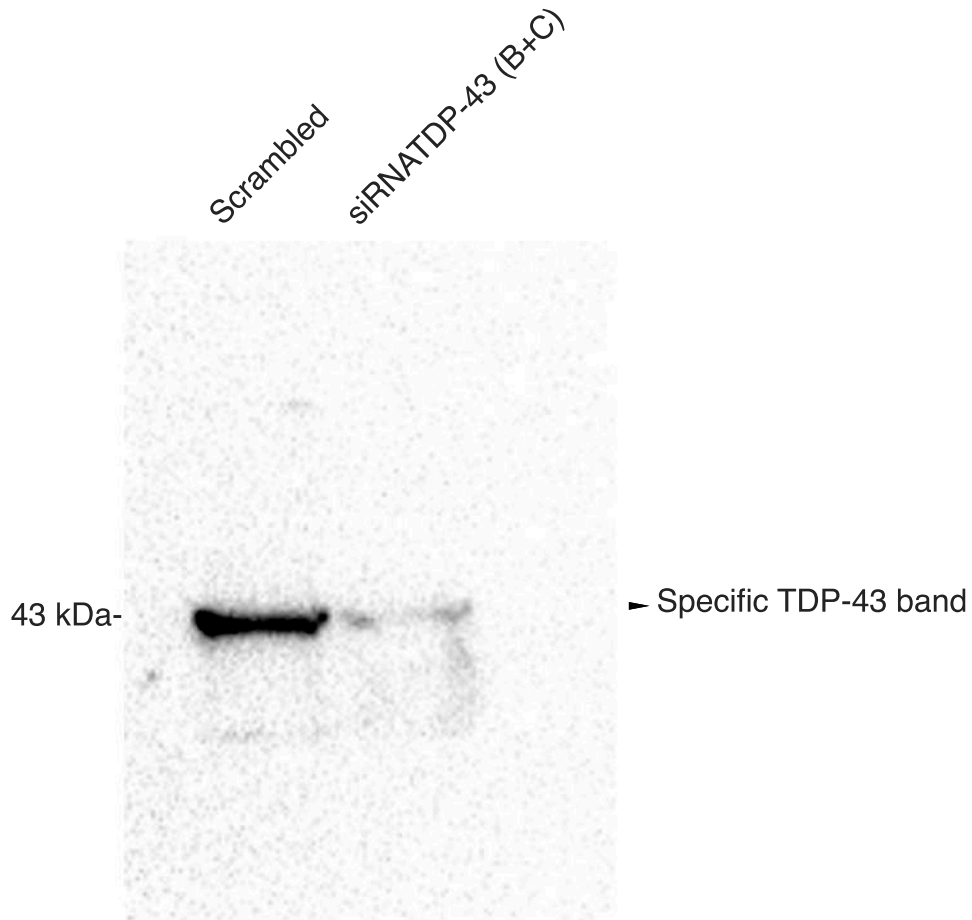

**Figure S4.** Replicate 3 Acetylated  $\alpha$ -tubulin complete gel Western-blot associated with Figure 6A  
Cabrera-Rodríguez, R., *et al.*

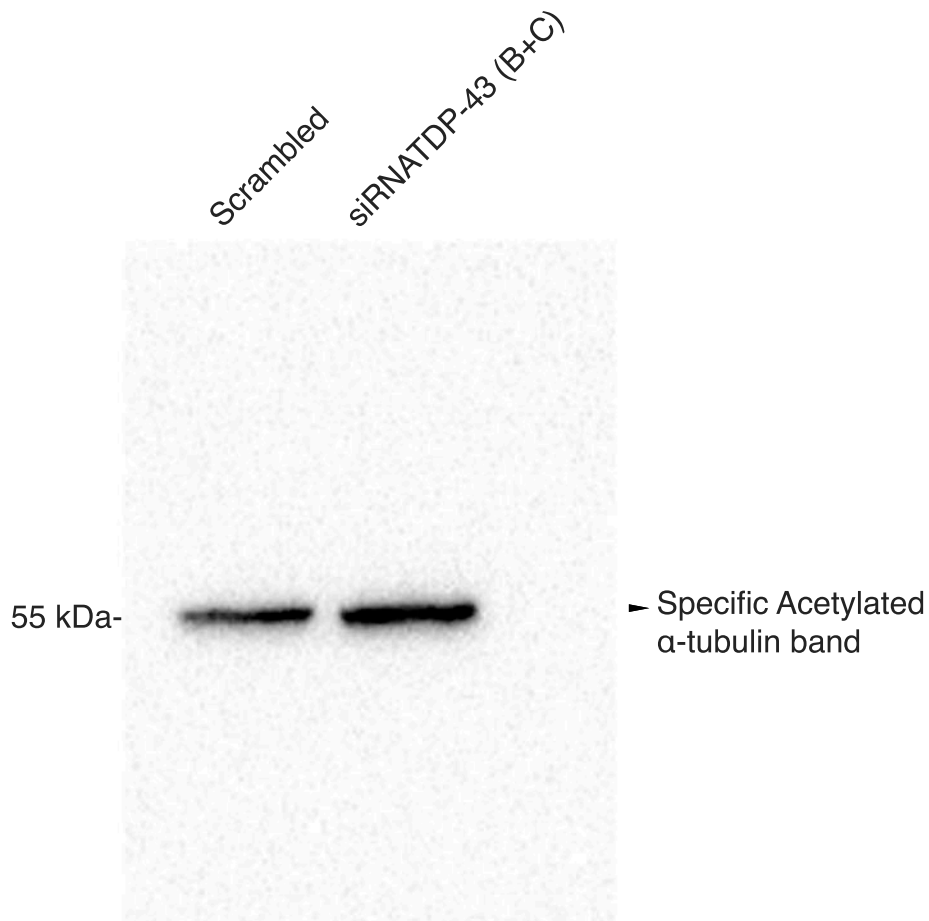

**Figure S4.** Replicate 3 Total  $\alpha$ -tubulin complete gel Western-blot associated with Figure 6A  
Cabrera-Rodríguez, R., *et al.*

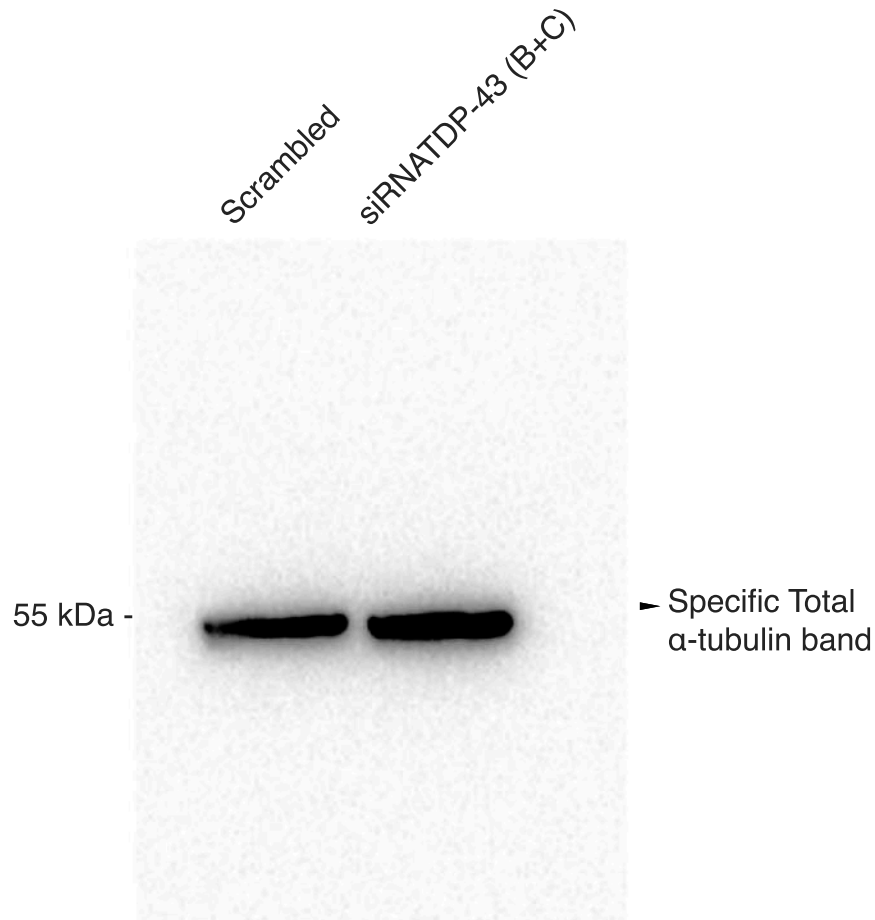

Supplement: s1 [file s1]
